# Supplementary material for: Prevalence of cigarette and waterpipe tobacco smoking among adults in three Eastern Mediterranean countries: a cross-sectional household survey
Source: PubMed Central journal article supplement — BMJ Open. 2022 Mar 4;12(3):e055201. doi: 10.1136/bmjopen-2021-055201 (PMC8900030; doi:10.1136/bmjopen-2021-055201), 2022-03-04
Supplement: bmjopen-2021-055201.draft_revisions.pdf [file bmjopen-2021-055201.draft_revisions.pdf]

# BMJ Open

BMJ Open is committed to open peer review. As part of this commitment we make the peer review history of every article we publish publicly available.

When an article is published we post the peer reviewers' comments and the authors' responses online. We also post the versions of the paper that were used during peer review. These are the versions that the peer review comments apply to.

The versions of the paper that follow are the versions that were submitted during the peer review process. They are not the versions of record or the final published versions. They should not be cited or distributed as the published version of this manuscript.

BMJ Open is an open access journal and the full, final, typeset and author-corrected version of record of the manuscript is available on our site with no access controls, subscription charges or pay-per-view fees (<http://bmjopen.bmj.com>).

If you have any questions on BMJ Open's open peer review process please email [info.bmjopen@bmj.com](mailto:info.bmjopen@bmj.com)

# BMJ Open

## Prevalence of Cigarette and Waterpipe Tobacco Smoking among Adults in Three Eastern Mediterranean Countries

|                               |                                                                                                                                                                                                                                                                                                                                                                                                                                                                                                                                                                                                                                                                                                                                                                                                                                                                                                                                                        |
|-------------------------------|--------------------------------------------------------------------------------------------------------------------------------------------------------------------------------------------------------------------------------------------------------------------------------------------------------------------------------------------------------------------------------------------------------------------------------------------------------------------------------------------------------------------------------------------------------------------------------------------------------------------------------------------------------------------------------------------------------------------------------------------------------------------------------------------------------------------------------------------------------------------------------------------------------------------------------------------------------|
| Journal:                      | <i>BMJ Open</i>                                                                                                                                                                                                                                                                                                                                                                                                                                                                                                                                                                                                                                                                                                                                                                                                                                                                                                                                        |
| Manuscript ID                 | bmjopen-2021-055201                                                                                                                                                                                                                                                                                                                                                                                                                                                                                                                                                                                                                                                                                                                                                                                                                                                                                                                                    |
| Article Type:                 | Original research                                                                                                                                                                                                                                                                                                                                                                                                                                                                                                                                                                                                                                                                                                                                                                                                                                                                                                                                      |
| Date Submitted by the Author: | 05-Jul-2021                                                                                                                                                                                                                                                                                                                                                                                                                                                                                                                                                                                                                                                                                                                                                                                                                                                                                                                                            |
| Complete List of Authors:     | Nakkash, Rima; American University of Beirut Department of Health Promotion and Community Health<br>Khader, Yousef; Jordan University of Science and Technology, Department of Community Medicine, Public Health and Family Medicine, Faculty of Medicine<br>Chalak, Ali; American University of Beirut, Department of Agriculture, Faculty of Agricultural and Food Sciences<br>Abla, Ruba; American University of Beirut, Faculty of Health Sciences<br>Abu-Rmeileh, Niveen; Birzeit University, Institute of Community and Public Health<br>Mostafa, Aya; Ain Shams University Faculty of Medicine, Department of Community, Environmental and Occupational Medicine<br>Jawad, Mohammed; Imperial College London School of Public Health, Public Health Policy Evaluation Unit<br>Lee, Ji-Hyun; University of Florida, Department of Biostatistics and UF Health Cancer Center<br>Salloum, Ramzi; University of Florida, Health Outcomes and Policy |
| Keywords:                     | PUBLIC HEALTH, EPIDEMIOLOGY, Health policy < HEALTH SERVICES ADMINISTRATION & MANAGEMENT                                                                                                                                                                                                                                                                                                                                                                                                                                                                                                                                                                                                                                                                                                                                                                                                                                                               |
|                               |                                                                                                                                                                                                                                                                                                                                                                                                                                                                                                                                                                                                                                                                                                                                                                                                                                                                                                                                                        |

SCHOLARONE™  
Manuscripts

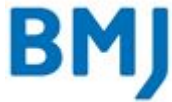

I, the Submitting Author has the right to grant and does grant on behalf of all authors of the Work (as defined in the below author licence), an exclusive licence and/or a non-exclusive licence for contributions from authors who are: i) UK Crown employees; ii) where BMJ has agreed a CC-BY licence shall apply, and/or iii) in accordance with the terms applicable for US Federal Government officers or employees acting as part of their official duties; on a worldwide, perpetual, irrevocable, royalty-free basis to BMJ Publishing Group Ltd ("BMJ") its licensees and where the relevant Journal is co-owned by BMJ to the co-owners of the Journal, to publish the Work in this journal and any other BMJ products and to exploit all rights, as set out in our [licence](#).

The Submitting Author accepts and understands that any supply made under these terms is made by BMJ to the Submitting Author unless you are acting as an employee on behalf of your employer or a postgraduate student of an affiliated institution which is paying any applicable article publishing charge ("APC") for Open Access articles. Where the Submitting Author wishes to make the Work available on an Open Access basis (and intends to pay the relevant APC), the terms of reuse of such Open Access shall be governed by a Creative Commons licence – details of these licences and which [Creative Commons](#) licence will apply to this Work are set out in our licence referred to above.

Other than as permitted in any relevant BMJ Author's Self Archiving Policies, I confirm this Work has not been accepted for publication elsewhere, is not being considered for publication elsewhere and does not duplicate material already published. I confirm all authors consent to publication of this Work and authorise the granting of this licence.

**Title:** Prevalence of Cigarette and Waterpipe Tobacco Smoking among Adults in Three Eastern Mediterranean Countries

**Authors**

Rima Nakkash<sup>1</sup>, Yousef Khader<sup>2</sup>, Ali Chalak<sup>3</sup>, Ruba Abla<sup>1</sup>, Niveen M.E. Abu-Rmeileh<sup>4</sup>, Aya Mostafa<sup>5</sup>, Mohammed Jawad<sup>6</sup>, Ji-Hyun Lee<sup>7</sup>, Ramzi G. Salloum<sup>1,8</sup>

**Affiliations**

1. Department of Health Promotion and Community Health, Faculty of Health Sciences, American University of Beirut, Beirut, Lebanon
2. Department of Community Medicine, Public Health and Family Medicine, Faculty of Medicine, Jordan University of Science and Technology, Irbid, Jordan
3. Department of Agriculture, Faculty of Agricultural and Food Sciences, American University of Beirut, Beirut, Lebanon
4. Institute of Community and Public Health, Birzeit University, Birzeit, Palestine
5. Department of Community, Environmental and Occupational Medicine, Faculty of Medicine, Ain Shams University, Cairo, Egypt
6. Public Health Policy Evaluation Unit, Imperial College London, London, United Kingdom
7. Department of Biostatistics and UF Health Cancer Center, University of Florida, Gainesville, FL, USA
8. Department of Health Outcomes and Biomedical Informatics, College of Medicine, University of Florida, Gainesville, FL, USA

Corresponding Author:

Rima Nakkash

Riad El-Solh / Beirut 1107 2020

American University of Beirut

Email: [rn06@aub.edu.lb](mailto:rn06@aub.edu.lb)

Word count: 3085

Tables/figures: 4 tables/ 1 figure

References: 25

## ABSTRACT

**Objectives:** Tobacco smoking is on the rise in the Eastern Mediterranean region. In light of limited surveillance of smoking in the region, this study sought to understand the prevalence of cigarette and waterpipe smoking among adults and the factors associated with smoking in Lebanon, Jordan, and Palestine.

**Design, setting and participants:** Household surveys were conducted in Lebanon (n=1680), Jordan (n=1925) and Palestine (n=1679). A multistage cluster sampling approach with probability-proportional-to-size random selection method was followed in the three countries

**Primary and secondary outcome measures:** Gender-specific prevalence rates and their 95% confidence intervals for cigarette and waterpipe smoking were estimated. Multivariable logistic regression was used to examine factors associated with current cigarette and waterpipe tobacco smoking.

**Results:** The prevalence of cigarette smoking among males/females respectively, was 48.6%/21.5% in Lebanon, 50.4%/9.1% in Jordan, and 53.4%/3.1% in Palestine. The prevalence of waterpipe smoking among males/females respectively was 32.7%/46.2% in Lebanon, 13.4%/7.8% in Jordan, and 18.0%/7.9% in Palestine. Cigarette smokers were more likely to be male, younger, and with lower educational attainment across the three countries. Waterpipe smokers were more likely to be young adults across the three countries. They were more likely to be male in Jordan and Palestine, and more likely to be female in Lebanon.

**Conclusions:** The high prevalence rates of smoking in Lebanon, Jordan, and Palestine are concerning. Continued surveillance is key to monitor smoking patterns and inform stronger tobacco control measures.

**Keywords:** cigarette smoking, waterpipe tobacco smoking, smoking prevalence, surveillance

### Strengths and Limitations of the study:

- The study reports contemporary estimates of smoking prevalence using large, nationally representative surveys, that have been consistently lacking in previous studies.
- The study used standardized questionnaires across the three countries, allowing for valid cross-country comparisons.
- Tobacco use was self-reported and not biochemically verified and only a small number of females reported current smoking in Jordan and Palestine, which may have underreported prevalence.
- The study did not report on use of other alternative smoking products which are increasingly more available in the loosely regulated markets of those countries.

## INTRODUCTION

1  
2  
3 Smoking is the leading cause of preventable death as well as a main risk factor for cancer,  
4 cardiovascular and pulmonary diseases<sup>[1]</sup>. Although considerable progress has been achieved in  
5 curbing the tobacco epidemic in many parts of the world, smoking trends continue to increase in  
6 low- and middle-income countries<sup>[2]</sup>. One notable example has been the Eastern Mediterranean  
7 region –which the World Health Organization (WHO) has projected the smoking prevalence to  
8 increase by 2025<sup>[2]</sup>. Cigarette smoking is highly prevalent in the Eastern Mediterranean region,  
9 due to weak regulatory environments, insufficient surveillance infrastructure and interference  
10 from a strong tobacco industry<sup>[3]</sup>. The problem is compounded by the wide prevalence of  
11 waterpipe tobacco smoking<sup>[4]</sup>. Waterpipe smoking rates in the region are considered the highest  
12 worldwide, with notably high prevalence among young adults<sup>[5]</sup>. This pattern is attributed to  
13 multiple factors, including the perception of waterpipe smoking as a less harmful alternative to  
14 cigarette smoking, the café culture encouraging social smoking of the waterpipe, and appeal of  
15 flavored waterpipe tobacco<sup>[6, 7]</sup>.  
16  
17  
18

19 The World Health Organization (WHO) Framework Convention on Tobacco Control requires  
20 parties to collect data on tobacco use and exposure on a regular basis to monitor smoking trends  
21 and policy implementation<sup>[1]</sup>. To date, surveillance of tobacco use among adults in the Eastern  
22 Mediterranean region has been limited. For example, routinely available data from the Global  
23 Adult Tobacco Survey (GATS) are only available in Egypt (2009)<sup>[8]</sup>, Qatar (2013)<sup>[9]</sup> and  
24 Pakistan (2014)<sup>[10]</sup>. Other surveillance efforts in the region have been limited to specific  
25 populations, such as youth<sup>[11]</sup>, university students<sup>[12, 13]</sup>, and healthcare professionals <sup>[14]</sup>.  
26 These limitations in the available smoking prevalence data justify the need for detailed national  
27 prevalence data on both cigarette and waterpipe smoking among adults in Eastern Mediterranean  
28 countries.  
29  
30  
31

32 In Lebanon, the most recent national estimates for adult cigarette smoking date back to 2013,<sup>[2]</sup>  
33 when the prevalence of current cigarette smoking was 34% among males and 19% among  
34 females. The national estimates for waterpipe tobacco smoking prevalence (25.3%) date back to  
35 2009, when the prevalence rate was 26.5% among males and 24.3% among females<sup>[15]</sup>. In  
36 Jordan, according to STEPS 2019 survey, the prevalence of current smoking in Jordan is 41%  
37 (65.3% among men and 16.4% among women)<sup>[16]</sup>. As for Palestine, the most recent national  
38 estimates were from the Palestinian Family Survey in 2010, when the prevalence rate for  
39 cigarette smoking was 29.9% among adults (49.7% among men and 3.5% among women)<sup>[17]</sup>.  
40  
41

42 Given that the most recent national prevalence estimates across the three countries date back to  
43 one decade, this study sought to estimate contemporary prevalence rates of current cigarette and  
44 waterpipe smoking in Lebanon, Jordan, and Palestine, and their correlates. Further, the issue of  
45 dual tobacco use has not been sufficiently explored in studies coming from the region, and as  
46 such, this study examined the dual use of cigarette and waterpipe tobacco in these three  
47 countries.  
48  
49

## 50 **METHODS**

### 51 **Data source**

52 We conducted nationally-representative in-person household surveys in Lebanon, Jordan, and  
53 Palestine between June and August 2019. Eligible respondents included males and females aged  
54 18 years and older, residing in each of the countries as their primary place of residence,  
55  
56  
57  
58  
59

1  
2  
3 regardless of nationality. We identified target sample sizes of 1,680 (50% female) for each  
4 country, based on sample size calculations to estimate the prevalence of current waterpipe  
5 tobacco smoking for adult males and females separately in each country, based on previously  
6 reported prevalence rates[2, 18]. A multistage cluster sampling approach with probability-  
7 proportional-to-size random selection method was followed. In each country, the sample of  
8 households was chosen in two stages. First, well-defined clusters were selected within each  
9 governorate (i.e., province). Second, housing units were selected within each selected cluster.  
10 The sampling frame for clusters was specific to the characteristics of each country. In Lebanon,  
11 all eight governorates were selected for sampling: Akkar, Baalbek-Hermel, Bekaa, Beirut, Mount  
12 Lebanon, Nabatieh, North Lebanon, and South Lebanon. In Jordan, all 12 governorates were  
13 included in the study: Ajloun, Amman, Aqaba, Balqa, Irbid, Jerash, Karak, Ma'an, Madaba,  
14 Ma'fra, Tafilah, and Zarqa. In Palestine, all 11 governorates of the West Bank were selected:  
15 Bethlehem, East Jerusalem, Hebron, Jenin, Qalqilya, Nablus, Ramallah and Al-Bireh, Jericho,  
16 Salfit, Tubas, and Tulkarm. The Palestinian governorates in Gaza were excluded due to logistical  
17 barriers. The second stage of household selection involved choosing a random sample of 30  
18 households from a complete list of households in a selected area, based on local administrative  
19 sources or household lists from the most recent census. One eligible male and one female  
20 resident were selected from each selected household. In Lebanon and Palestine, if an eligible  
21 female or male was not available for interview at the time of household visit, additional  
22 households were selected until an equal number of males and females was reached. In Jordan,  
23 additional households were selected that yielded a higher number of males than females. After  
24 eligibility screening, we provided potential respondents with information about the study and  
25 asked them to provide consent to participate. With the exception of aforementioned respondent  
26 selection, the same methods and recruitment protocol were used in all three countries.  
27  
28  
29  
30  
31

### 32 **Data collection**

33 Data were collected using the same structured, Arabic-language questionnaire, with selected  
34 questions tailored to local context for each country. In the three countries, the surveys were  
35 administered face-to-face by trained interviewers. Data collectors in the three countries were  
36 trained on the ethics of data collection, consenting, sampling methodology and on the survey  
37 questions, using the same training manual. The training included a review of each questionnaire  
38 item, followed by practice sessions which involved role play as interviewer and interviewee  
39 which focused on probing to make sure all interviewees give full answers to ensure that there is  
40 no missing data for the analysis.  
41  
42

### 43 **Measures**

44 Respondents were asked if they had ever tried cigarettes or waterpipe tobacco. Among ever users  
45 of each product, respondents were asked if they were current users of the product. Current  
46 cigarette smoking was defined as currently smoking cigarettes every day or some days.  
47 Similarly, current waterpipe smoking was defined as currently smoking tobacco in a waterpipe  
48 every day or some days. Among current cigarette smokers, respondents were asked about the  
49 number of cigarettes smoked per day. Dual current smokers included both cigarette and  
50 waterpipe smokers while any current smoker included cigarette or waterpipe smokers. Among  
51 current waterpipe tobacco smokers, respondents were asked about the number of waterpipe  
52 sessions they smoked at home per week, the number of waterpipe sessions they smoked in a café  
53 per week, and whether they usually smoked flavored waterpipe tobacco. We assessed the  
54  
55  
56  
57  
58  
59  
60

demographic characteristics of respondents, including their sex, age in years, marital status, educational attainment, and household monthly income.

### Statistical analysis

Descriptive statistics were used to summarize the study participants' demographic and socio-economic characteristics. We estimated overall gender-specific prevalence rates of cigarette and waterpipe smoking and their 95% confidence intervals (CI) within each country. Multivariable logistic regression analysis was conducted to examine factors associated with current cigarette smoking and current waterpipe smoking in separate models for each country. The independent variables tested in these models included gender (female vs. male), age group in years (18-29, 30-49, 50-64, and 65 or older), educational attainment (primary school or less, middle school, high school/diploma, and university), marital status (ever married vs. never married) and individual monthly income (quartiles within each country). Odds ratios (ORs) and their 95% CIs were estimated from the models. A p-value of less than 0.05 was considered statistically significant. Respondents with missing data on outcome measures or covariates were excluded from models on a case-wise basis. Data were analyzed using Stata statistical software version 16 (StataCorp, College Station, TX).

### Patient and Public Involvement

It was not appropriate or possible to involve patients or the public in the design, or conduct, or reporting, or dissemination plans of our research

## RESULTS

Table 1 presents the characteristics of respondents by gender in each country. A total of 1,680 respondents in Lebanon, 1,925 in Jordan, and 1,679 in Palestine completed the surveys. Females represented 50.0% of the sample in Lebanon, 44.6% in Jordan and 50.0% in Palestine. In terms of age composition, 45.1% of respondents in Lebanon, 45.9% of respondents in Jordan, and 41.3% of respondents in the Palestine were younger than 50 years old. In terms of marital status, 80.8% of respondents in Lebanon, 75% of respondents in Jordan and 81.5% of respondents in Palestine were ever married. In terms of education, 20.7% of respondents in Lebanon, 25.1 % in Jordan, and 16.2 % in Palestine completed university education.

**Table 1. Socio-demographic characteristics by gender and country**

| Variable             | Lebanon         |                   | Jordan           |                   | Palestine       |                   |
|----------------------|-----------------|-------------------|------------------|-------------------|-----------------|-------------------|
|                      | Male<br>(n=840) | Female<br>(n=840) | Male<br>(n=1067) | Female<br>(n=858) | Male<br>(n=839) | Female<br>(n=840) |
|                      | (%) n           | (%) n             | (%) n            | (%) n             | (%) n           | (%) n             |
| <b>Age, in years</b> |                 |                   |                  |                   |                 |                   |
| 18 – 29              | (22.7) 191      | (29.3) 246        | (26.4) 282       | (27.7) 238        | (32.9) 276      | (25.7) 216        |
| 30 – 49              | (44.5) 374      | (45.7) 384        | (45.2) 482       | (46.6) 400        | (37.8) 317      | (44.8) 376        |
| 50 – 64              | (28.3) 238      | (23.2) 195        | (19.9) 212       | (18.9) 162        | (25.4) 213      | (28.6) 240        |
| ≥65                  | (4.4) 37        | (1.8) 15          | (8.5) 91         | (6.8) 58          | (3.9) 33        | (1.0) 8           |



| Marital Status         |            |            |            |            |            |            |
|------------------------|------------|------------|------------|------------|------------|------------|
| Never married          | (20.4) 170 | (18.1) 153 | (25.0) 210 | (12.1) 102 | (22.1) 185 | (8.2) 69   |
| Ever married           | (79.8) 670 | (81.8) 687 | (75.0) 629 | (75.0) 738 | (75.0) 629 | (87.9) 738 |
| Education              |            |            |            |            |            |            |
| Primary school or less | (17.4) 146 | (11.9) 100 | (22.3) 238 | (24.0) 206 | (44.3) 372 | (50.4) 423 |
| Middle school          | (21.7) 182 | (21.3) 179 | (41.1) 439 | (36.6) 314 | (33.7) 283 | (25.8) 217 |
| High school/diploma    | (40.0) 336 | (46.4) 390 | (12.0) 128 | (13.9) 119 | (7.5) 63   | (5.9) 50   |
| University             | (21.0) 176 | (20.4) 171 | (24.6) 262 | (25.5) 219 | (14.4) 121 | (17.9) 150 |
| Monthly Income*        |            |            |            |            |            |            |
| Quartile 1             | (7.51) 62  | (9.1) 75   | (21.7) 227 | (24.9) 207 | (21.2) 174 | (26.6) 214 |
| Quartile 2             | (39.5) 326 | (38.8) 321 | (39.4) 411 | (38.5) 320 | (41.9) 344 | (44.0) 355 |
| Quartile 3             | (39.1) 323 | (38.7) 320 | (25.1) 262 | (23.7) 197 | (19.8) 163 | (16.5) 133 |
| Quartile 4             | (13.9) 115 | (13.4) 111 | (13.8) 144 | (12.9) 107 | (17.0) 140 | (12.9) 104 |
| No income              | (1.7) 14   | (1.6) 13   | (2.2) 23   | (3.2) 27   | (2.2) 18   | (4.0) 34   |

\*Income quartile levels: **Lebanon:** [1] <\$529.88; [2] \$529.88 - < \$993.53; [3] \$993.53 - < \$1,987.05; [4] ≥ \$1,987.05. **Jordan:** [1] < \$423.13; [2] \$423.13 = < \$705.22; [3] \$705.22 - < \$1,269.39. **Palestine:** [1] < \$610.04; \$610.04 - < \$1,067.57; [3] \$1,067.57 - < \$1,525.10; [4] ≥ 1,525.10.

### Prevalence of cigarette and waterpipe tobacco smoking

Figure 1 shows the overall and gender-specific prevalence of current cigarette smoking, waterpipe smoking, dual smoking and any smoking, by country. Overall, the prevalence rate (95% CI) for current cigarette smoking was 35.1% (32.8, 37.3) in Lebanon, 32.0% (29.9, 34.1) in Jordan, and 28.2% (26.1, 30.5). The prevalence rate for current waterpipe smoking was 39.5% (37.1, 41.8) in Lebanon, 11.0% (9.6, 12.4) in Jordan, and 12.9% (11.4, 14.6) in Palestine. The overall rate for dual current smoking was 3.6% (2.8, 4.6) in Lebanon, 2.8% (2.1, 3.6) in Jordan, and 4.4% (3.5, 5.5) in Palestine. As for any current smoking, the prevalence rate was 70.9% (68.7, 73.1) in Lebanon, 40.2% (38.0, 42.4) in Jordan, and 36.7% (34.4, 39.1) in Palestine.

### Patterns of cigarette and waterpipe smoking

Table 2 presents the patterns of cigarette and waterpipe smoking among current smokers according to gender and country. In Lebanon, almost half of current cigarette smokers reported smoking ≥20 cigarettes per day (42.6% of males and 51.9% of females). In Jordan, more than half of male current cigarette smokers (52.0%) and one third of female cigarette smokers (33.3%) reported smoking ≥20 cigarettes per day. In Palestine, among those who currently smoke cigarettes, 37.5% of males and 3.8% of females reported smoking ≥20 cigarettes per day.

The majority of waterpipe smokers in Lebanon used flavored tobacco (86.2% of males and 89.2% of females), smoked more than 3 sessions at home (92.5% of males and 86.9% of females) and smoked three sessions or less per week in a café (90.0% of males and 96.3% of females). In Jordan, the majority of waterpipe smokers used flavored tobacco (92.3% of males and 98.5% of females), the majority of male respondents (70.5%) and less than half of females (46.9%) smoked more than three waterpipe sessions at home, and the majority of respondents smoked three sessions or less per week in a café (62.9% of males and 85.7% of females). In Palestine, the majority of waterpipe smokers used flavored tobacco (94.6% of males and 93.9%

1  
2  
3 of females), the majority of respondents (85.7% of males and 95.4% of females) smoked more  
4 than 3 sessions of waterpipe at home, and the majority of respondents smoked three sessions or  
5 less per week in a café (97.7% of males and 95.5% of females).  
6  
7  
8  
9  
10  
11  
12  
13  
14  
15  
16  
17  
18  
19  
20  
21  
22  
23  
24  
25  
26  
27  
28  
29  
30  
31  
32  
33  
34  
35  
36  
37  
38  
39  
40  
41  
42  
43  
44  
45  
46  
47  
48  
49  
50  
51  
52  
53  
54  
55  
56  
57  
58  
59  
60

For peer review only

**Table 2. Patterns of cigarette and waterpipe smoking among current smokers according to gender by country**

| Variable                             | Lebanon     |             | Jordan      |            | Palestine   |            |
|--------------------------------------|-------------|-------------|-------------|------------|-------------|------------|
|                                      | Males       | Females     | Males       | Females    | Males       | Females    |
|                                      | (%) n       | (%) n       | (%) n       | (%) n      | (%) n       | (%) n      |
| Cigarettes per day                   |             |             |             |            |             |            |
| <10                                  | (35.0) 143  | (34.8) 63   | (3.4) 18    | (18.0) 14  | (9.4) 42    | (23.1) 6   |
| 10 – 20                              | (42.6) 174  | (51.9) 94   | (44.6) 240  | (48.7) 38  | (53.1) 238  | (73.1) 19  |
| >20                                  | (22.3) 91   | (13.3) 24   | (52.0) 280  | (33.3) 26  | (37.5) 168  | (3.8) 1    |
| Total                                | (100.0) 408 | (100.0) 181 | (100.0) 538 | (100.0) 78 | (100.0) 448 | (100.0) 26 |
| Waterpipe sessions at home, per week |             |             |             |            |             |            |
| ≤3                                   | (7.5) 19    | (13.1) 49   | (29.5) 33   | (53.1) 34  | (85.7) 108  | (95.4) 62  |
| >3                                   | (92.5) 234  | (86.9) 326  | (70.5) 79   | (46.9) 30  | (14.3) 18   | (4.6) 3    |
| Waterpipe sessions at café, per week |             |             |             |            |             |            |
| ≤3                                   | (90.9) 180  | (96.3) 236  | (62.9) 22   | (85.7) 6   | (97.7) 85   | (95.5) 21  |
| >3                                   | (9.1) 18    | (3.7) 9     | (37.1) 13   | (14.3) 1   | (2.3) 2     | (4.5) 1    |
| Type of waterpipe tobacco smoked     |             |             |             |            |             |            |
| Flavored                             | (86.2) 237  | (89.2) 346  | (92.3) 132  | (98.5) 66  | (94.6) 141  | (93.9) 62  |
| Non-flavored                         | (13.8) 38   | (10.8) 42   | (7.7) 11    | (1.5) 1    | (5.4) 8     | (6.1) 4    |

### Factors associated with current cigarette smoking

Table 3 presents the results of the multivariable analysis of factors associated with current cigarette smoking by country. In Lebanon, males were more likely than females to be current cigarette smokers (OR: 5.07; 95% CI: 3.73, 6.89). Compared with young adults 18-29 years old, respondents who were older were more likely to be current smokers: (5.52; 3.22, 9.49) among those 30-49 years old, (6.34; 3.57, 11.26) among adults 50-64 years old, and (2.84; 1.15, 7.05) among adults  $\geq 65$  years old. Compared with adults who had a primary school education or less, adults with a high school education (0.44; 0.27, 0.72) and those with a university education (0.52; 0.29, 0.92) were significantly less likely to be current cigarette smokers.

In Jordan, males were significantly more likely than females to be current cigarette smokers (13.77; 9.29, 20.44). Adults  $\geq 65$  years old were less likely than those 18-29 years old to be current cigarette smokers (0.35; 0.19, 0.65). Compared with adults who had a primary school education or less, adults with a high school education (0.61; 0.38, 0.97) and those with a university education (0.61; 0.41, 0.91) were less likely to be current cigarette smokers. In addition, adults in the highest income quartile were significantly more likely to be current smokers compared with adults in the lowest income quartile (1.68; 1.05, 2.69).

Finally, in Palestine, males were also significantly more likely than females to be current cigarette smokers (66.95; 29.28, 153.10). Adults  $\geq 65$  years old were less likely than those 18-29 years old to be cigarette smokers (0.33; 0.12, 0.88). Compared to adults with a primary school education or less, adults with a middle school education (0.58; 0.39, 0.84) and those with a university education (0.57; 0.35, 0.93) were significantly less likely to be current cigarette smokers.

**Table 3. Multivariable analysis of factors associated with current cigarette smoking among adults by country**

| Variable               | Lebanon            |        | Jordan              |        | Palestine             |        |
|------------------------|--------------------|--------|---------------------|--------|-----------------------|--------|
|                        | OR (95% CI)        | p      | OR (95% CI)         | p      | OR (95% CI)           | p      |
| <b>Gender</b>          |                    |        |                     |        |                       |        |
| Female                 | reference          |        | reference           |        | reference             |        |
| Male                   | 5.07 (3.73, 6.89)  | <0.001 | 13.77 (9.29, 20.44) | <0.001 | 66.95 (29.28, 153.10) | <0.001 |
| <b>Age, in years</b>   |                    |        |                     |        |                       |        |
| 18 – 29                | reference          |        | reference           |        | reference             |        |
| 30 – 49                | 5.52 (3.22, 9.49)  | <0.001 | 1.06 (0.77, 1.54)   | 0.76   | 1.43 (0.89, 2.27)     | 0.13   |
| 50 – 64                | 6.34 (3.57, 11.26) | <0.001 | 0.89 (0.57, 1.37)   | 0.59   | 1.64 (0.38, 1.05)     | 0.08   |
| ≥65                    | 2.84 (1.15, 7.05)  | 0.024  | 0.35 (0.19, 0.65)   | 0.001  | 0.33 (0.12, 0.88)     | 0.03   |
| <b>Education</b>       |                    |        |                     |        |                       |        |
| Primary school or less | reference          |        | reference           |        | reference             |        |
| Middle school          | 0.94 (0.58, 1.52)  | 0.79   | 0.83 (0.59, 1.17)   | 0.31   | 0.58 (0.39, 0.84)     | <0.001 |
| High school/diploma    | 0.44 (0.27, 0.72)  | 0.001  | 0.61 (0.38, 0.97)   | 0.04   | 0.68 (0.37, 1.26)     | 0.22   |
| University             | 0.52 (0.29, 0.92)  | 0.02   | 0.61 (0.41, 0.91)   | 0.02   | 0.57 (0.35, 0.93)     | 0.03   |
| <b>Marital Status</b>  |                    |        |                     |        |                       |        |
| Not Married            | reference          |        | reference           |        | reference             |        |
| Married                | 0.61 (0.36, 1.02)  | 0.06   | 1.18 (0.83, 1.67)   | 0.35   | 1.12 (0.69, 1.80)     | 0.64   |
| <b>Monthly Income*</b> |                    |        |                     |        |                       |        |
| Quartile 1             | reference          |        | reference           |        | reference             |        |
| Quartile 2             | 1.09 (0.60, 2.01)  | 0.77   | 1.42 (1.00, 2.03)   | 0.05   | 0.83 (0.54, 1.26)     | 0.37   |
| Quartile 3             | 1.06 (0.56, 2.00)  | 0.87   | 1.46 (0.99, 2.15)   | 0.06   | 1.17 (0.71, 1.93)     | 0.54   |
| Quartile 4             | 1.61 (0.76, 3.40)  | 0.21   | 1.68 (1.05, 2.69)   | 0.03   | 0.62 (0.36, 1.06)     | 0.08   |
| No income              | 1.54 (0.44, 5.40)  | 0.50   | 0.98 (0.41, 2.36)   | 0.96   | 0.37 (0.12, 1.21)     | 0.10   |

\*Income quartile levels: **Lebanon:** [1] <\$529.88; [2] \$529.88 - < \$993.53; [3] \$993.53 - < \$1,987.05; [4] ≥ \$1,987.05. **Jordan:** [1] < \$423.13; [2] \$423.13 = < \$705.22; [3] \$705.22 - < \$1,269.39. **Palestine:** [1] < \$610.04; \$610.04 - < \$1,067.57; [3] \$1,067.57 - < \$1,525.10; [4] ≥ 1,525.10.

### Factors associated with current waterpipe tobacco smoking

Table 4 presents the results of multivariable analysis of factors associated with current waterpipe tobacco smoking by country. In Lebanon, males were less likely than females to be current waterpipe smokers (0.49; 0.37, 0.64). Also, adults older than 18-29 years old were less likely to be current waterpipe smokers: (0.30; 0.18, 0.49) among 30-49 years old, (0.08; 0.04, 0.15) among 50-64 years old, and (0.03; 0.01, 0.14). Compared to adults with a primary school education or less, adults with a high school education were more likely to be waterpipe smokers (1.87; 1.05, 3.34). Compared with adults in the lowest income quartile, those in the second (2.50; 1.19, 5.26) and third (2.45; 1.13, 5.30) quartiles were more likely to be current waterpipe smokers.

In Jordan, males were more likely than females to be current waterpipe smokers (1.92; 1.40, 2.62). Compared with adults 18-29 years old, older adults were less likely to be waterpipe smokers: (0.66; 0.44, 0.99) among those 30-49 years old, (0.45; 0.27, 0.75) among those 50-64 years old, and (0.07; 0.02, 0.31) among those  $\geq 65$  years old.

Similarly, in Palestine, males were more likely than females to be current waterpipe smokers (2.69; 1.85, 3.92). Compared with adults 18-29 years old, older adults were less likely to be waterpipe smokers: (0.48; 0.30, 0.77) among adults 30-49 years old, (0.19; 0.09, 0.35) among adults 50-64 years old, and (0.19; 0.05, 0.77) among adults  $\geq 65$  years old.

**Table 4. Multivariable analysis of factors associated with current waterpipe smoking among adults by country**

| Variable               | Lebanon           |        | Jordan            |        | Palestine         |        |
|------------------------|-------------------|--------|-------------------|--------|-------------------|--------|
|                        | OR (95% CI)       | p      | OR (95% CI)       | p      | OR (95% CI)       | p      |
| <b>Gender</b>          |                   |        |                   |        |                   |        |
| Female                 | reference         |        | reference         |        | reference         |        |
| Male                   | 0.49 (0.37, 0.64) | <0.001 | 1.92 (1.40, 2.62) | <0.001 | 2.69 (1.85, 3.92) | <0.001 |
| <b>Age, in years</b>   |                   |        |                   |        |                   |        |
| 18 – 29                | reference         |        | reference         |        | reference         |        |
| 30 – 49                | 0.30 (0.18, 0.49) | <0.001 | 0.66 (0.44, 0.99) | 0.04   | 0.48 (0.30, 0.77) | 0.002  |
| 50 – 64                | 0.08 (0.04, 0.15) | <0.001 | 0.45 (0.27, 0.75) | 0.02   | 0.19 (0.09, 0.35) | <0.001 |
| ≥65                    | 0.03 (0.01, 0.14) | <0.001 | 0.07 (0.02, 0.31) | <0.001 | 0.19 (0.05, 0.77) | 0.02   |
| <b>Education</b>       |                   |        |                   |        |                   |        |
| Primary school or less | reference         |        | reference         |        | reference         |        |
| Middle school          | 1.03 (0.58, 1.86) | 0.91   | 1.34 (0.87, 2.08) | 0.18   | 1.37 (0.90, 2.10) | 0.14   |
| High school/diploma    | 1.87 (1.05, 3.34) | 0.03   | 1.14 (0.64, 2.02) | 0.65   | 1.72 (0.84, 3.51) | 0.14   |
| University             | 1.90 (0.98, 3.69) | 0.06   | 1.19 (0.73, 1.95) | 0.47   | 1.26 (0.75, 2.13) | 0.39   |
| <b>Marital Status</b>  |                   |        |                   |        |                   |        |
| Not Married            | reference         |        | reference         |        | reference         |        |
| Married                | 1.54 (0.91, 2.63) | 0.11   | 1.06 (0.71, 1.58) | 0.76   | 0.66 (0.41, 1.06) | 0.08   |
| <b>Monthly Income*</b> |                   |        |                   |        |                   |        |
| Quartile 1             | reference         |        | reference         |        | reference         |        |
| Quartile 2             | 2.50 (1.19, 5.26) | 0.02   | 0.75 (0.49, 1.14) | 0.18   | 0.71 (0.43, 1.18) | 0.18   |
| Quartile 3             | 2.45 (1.13, 5.30) | 0.02   | 1.05 (0.67, 1.66) | 0.82   | 0.89 (0.49, 1.61) | 0.50   |
| Quartile 4             | 1.93 (0.79, 4.74) | 0.15   | 1.44 (0.87, 2.37) | 0.16   | 1.20 (0.66, 2.20) | 0.66   |
| No income              | 1.27 (0.28, 5.84) | 0.76   | 1.01 (0.37, 2.75) | 0.98   | 0.72 (0.22, 2.37) | 0.22   |

\*Income quartile levels: **Lebanon:** [1] <\$529.88; [2] \$529.88 - < \$993.53; [3] \$993.53 - < \$1,987.05; [4] ≥ \$1,987.05. **Jordan:** [1] < \$423.13; [2] \$423.13 = < \$705.22; [3] \$705.22 - < \$1,269.39. **Palestine:** [1] < \$610.04; \$610.04 - < \$1,067.57; [3] \$1,067.57 - < \$1,525.10; [4] ≥ 1,525.10.

## DISCUSSION

This study provides contemporary estimates of the prevalence and patterns of cigarette and waterpipe smoking among adults in Lebanon, Jordan and Palestine using nationally representative surveys. Findings from the study raise renewed concerns over tobacco use in these countries, which have some of the highest smoking prevalence rates globally: more than two in three adults in Lebanon are current smokers of combustible tobacco products, and almost two-thirds of adult males in Jordan and Palestine are also current smokers. Generally, males were more likely to be current smokers than females. However, almost half of adult females were current waterpipe smokers in Lebanon, exceeding by 40% the prevalence among adult males in that country.

Our study showed comparable results to previously reported prevalence estimates of cigarette smoking in Lebanon,[19] with significantly higher estimates in males than females, yet a higher prevalence for waterpipe smoking particularly in females, which may be partially explained by the fact that waterpipe smoking is becoming a socially normative behavior, and it is unregulated, widely available and affordable in Lebanon[20]. In Jordan, our results were comparable to previously reported estimates from the 2019 STEP[16]. In Palestine, adult prevalence estimates among males were markedly higher than previously reported estimates[18, 21].

The gender- and age-specific prevalence rates of cigarette and waterpipe tobacco smoking are generally consistent with previous findings in the three countries[3]. Females in Lebanon had the highest prevalence of waterpipe smoking whereas males in Palestine had the highest prevalence of cigarette smoking across the three countries. Young adults across all three countries were more likely to smoke waterpipe tobacco. This may be attributable to the fact that waterpipe smoking is considered more socially acceptable and is widely perceived to be less harmful than cigarette smoking among young people[6].

Patterns of smoking were different among current cigarette smokers across the three countries. More than one-third of males and females in Lebanon were light smokers, averaging less than ten cigarettes per day. In contrast, only 3.4% of males and 18.0% of females who were current cigarette smokers in Jordan were light smokers. Similarly, in Palestine, 9.4% of males and 23.1% of females were light smokers. These patterns, combined with the high overall prevalence rates of cigarette smoking, may be suggestive that for a significant proportion of smokers, cigarette smoking may be a social behavior, especially in Lebanon. Alternatively, almost all male smokers in Jordan were heavy smokers, suggesting higher levels of addiction, with relevant implications for smoking cessation programs.

As for waterpipe smoking patterns, the vast majority of current smokers in Lebanon reported smoking more than three sessions weekly at home, and three sessions or less in cafés. This pattern was similar among males in Jordan. However, a majority of female smokers reported three sessions or less weekly regardless of the setting. This pattern was also reflected among males and females in Palestine. Across all three countries, the overwhelmingly majority of current waterpipe smokers use flavored tobacco. This pattern may be attributed to increased availability of flavored tobacco products, affordability, their unregulated marketing, as well as poor and often misleading labeling of waterpipe tobacco products[5]. Previous research reported



1  
2  
3 that smokers using flavored waterpipe tobacco experience more satisfaction, joy and calmness  
4 following the smoking session[22].  
5

6  
7 Strengths of this study include the fact that it reports contemporary estimates of smoking  
8 prevalence using large, nationally representative surveys, that have been consistently lacking in  
9 previous studies. The study used standardized questionnaires across the three countries, allowing  
10 for valid cross-country comparisons. Study limitations include the fact that tobacco use was self-  
11 reported and not biochemically verified, which may underreport prevalence. In addition, only a  
12 small number of females reported current smoking in Jordan and Palestine. These small sample  
13 sizes may have resulted in unreliable estimates of the detailed patterns of cigarette and waterpipe  
14 smoking reported for females in the two countries. The study also did not report on use of other  
15 alternative smoking products such as electronic cigarettes[16, 23], heated tobacco, and midwakh  
16 [24, 25], which are increasingly more available in the loosely regulated markets of those  
17 countries.  
18  
19

## 20 **CONCLUSION**

21 The alarmingly high prevalence of tobacco smoking in Lebanon, Jordan, and Palestine highlights  
22 the immediate need for strengthening existing tobacco control policies, especially those that curb  
23 waterpipe tobacco smoking. A starting point would be to regularly monitor tobacco trends at the  
24 national level using surveillance data such as the ones reported in this study. Findings from this  
25 research provide policy makers with evidence that can help in pushing forward implementation  
26 and enforcement of more effective and tailored tobacco control measures  
27  
28  
29  
30  
31  
32  
33  
34  
35  
36  
37  
38  
39  
40  
41  
42  
43  
44  
45  
46  
47  
48  
49  
50  
51  
52  
53  
54  
55  
56  
57  
58  
59  
60

## ACKNOWLEDGEMENTS

### Contributors

YK led the study design. RN, YK, and NAR monitored data collection. YK, MJ and AC was responsible for data analysis. RN, RA, and RS wrote the first draft. YK, AC, NAR, MJ, AM, and JL contributed to successive drafts. All authors approved the final manuscript.

### Funding

This study was funded by the International Development Research Centre (Grant number 108821).

### Disclaimer

The funding agency played no role in study design, in the collection, analysis and interpretation of data, in the writing of the report and in the decision to submit the article for publication. The content is solely the responsibility of the authors and does not necessarily represent the official views of the funding agency.

### Ethics approval

The institutional review boards at the American University of Beirut, Jordan University of Science and Technology, and Birzeit University.

### Conflict of Interests

None declared.

### Data Sharing

Data are available upon reasonable request.

## REFERENCES

1. WHO. WHO report on the global tobacco epidemic, 2008: the MPOWER package. Geneva, Switzerland: World Health Organization; 2008.
2. WHO. WHO global report on trends in prevalence of tobacco smoking 2000-2025: World Health Organization; 2018.
3. Maziak W, Nakkash R, Bahelah R, et al. Tobacco in the Arab world: old and new epidemics amidst policy paralysis. *Health Policy Plan.* 2014;29(6):784-94.
4. Akl EA, Gunukula SK, Aleem S, et al. The prevalence of waterpipe tobacco smoking among the general and specific populations: a systematic review. *BMC Public Health.* 2011;11:244.
5. Maziak W, Taleb ZB, Bahelah R, et al. The global epidemiology of waterpipe smoking. *Tob Control.* 2015;24 Suppl 1:i3-i12.
6. Akl EA, Ward KD, Bteddini D, et al. The allure of the waterpipe: a narrative review of factors affecting the epidemic rise in waterpipe smoking among young persons globally. *Tob Control.* 2015;24 Suppl 1:i13-i21.
7. Salloum RG, Nakkash R, Abu-Rmeileh NME, et al. Individual-level determinants of waterpipe smoking demand in four Eastern-Mediterranean countries. *Health Promot Int.* 2019;34(6):1157-66.
8. WHO. Global Adult Tobacco Survey: Egypt Country Report 2009. 2009.
9. WHO. Global Adult Tobacco Survey: Qatar Country Report 2013. 2013.
10. WHO. Global Adult Tobacco Survey: Pakistan Country Report 2014. 2014.
11. Jawad M, Lee JT, Millett C. Waterpipe Tobacco Smoking Prevalence and Correlates in 25 Eastern Mediterranean and Eastern European Countries: Cross-Sectional Analysis of the Global Youth Tobacco Survey. *Nicotine Tob Res.* 2016;18(4):395-402.
12. Salloum RG, Lee J, Mostafa A, et al. Waterpipe Tobacco Smoking among University Students in Three Eastern Mediterranean Countries: Patterns, Place, and Price. *Subst Use Misuse.* 2019;54(14):2275-83.
13. Hamadeh RR, Lee J, Abu-Rmeileh NME, et al. Gender differences in waterpipe tobacco smoking among university students in four Eastern Mediterranean countries. *Tob Induc Dis.* 2020;18:100.
14. Merrill RM, Madanat H, Kelley AT. Smoking prevalence, attitudes, and perceived smoking prevention and control responsibilities and practices among nurses in Amman, Jordan. *Int J Nurs Pract.* 2010;16(6):624-32.
15. Sibai A, Tohme R, Mahfoud Z, et al. Non-communicable diseases and behavioral risk factor survey: comparison of estimates based on cell phone interviews with face to face interviews. WHO Lebanon office Beirut, Lebanon: Final report submitted to World Health Organization-Lebanon office. 2009.
16. Ministry of Health Jordan. Jordan National Stepwise (STEPS) Survey for Non-communicable Disease Risk Factors. Jordan 2019
17. Palestinian Bureau of Statistics. Palestinian Family Survey 2010. Monitoring the Situation of Children and Women. UNICEF, UNFPA. 2013.
18. Abdulrahim S, Jawad M. Socioeconomic differences in smoking in Jordan, Lebanon, Syria, and Palestine: A cross-sectional analysis of national surveys. *PLoS One.* 2018;13(1):e0189829.

19. Sibai AM, Iskandarani M, Darzi A, et al. Cigarette smoking in a Middle Eastern country and its association with hospitalisation use: a nationwide cross-sectional study. *BMJ Open*. 2016;6(4):e009881.
20. Daou KN, Bou-Orm IR, Adib SM. Factors associated with waterpipe tobacco smoking among Lebanese women. *Women Health*. 2018;58(10):1124-34.
21. Bronnum-Hansen H, Jonassen M, Shaheen A, et al. The impact of smoking on expected lifetime with and without chronic disease among Palestinian men in the West Bank. *Eur J Public Health*. 2018;28(3):538-41.
22. Ben Taleb Z, Breland A, Bahelah R, et al. Flavored Versus Nonflavored Waterpipe Tobacco: A Comparison of Toxicant Exposure, Puff Topography, Subjective Experiences, and Harm Perceptions. *Nicotine Tob Res*. 2019;21(9):1213-9.
23. Aghar H, El-Khoury N, Reda M, et al. Knowledge and attitudes towards E-cigarette use in Lebanon and their associated factors. *BMC Public Health*. 2020;20:1-18.
24. Nakkash RT, El Boukhari N, Afifi RA. 'When I smoked it, it was like a slap in the face but it felt really good': exploring determinants of midwakh use among young adults in Lebanon. *Tobacco Control*. 2021;30(3):351-5.
25. Afifi R, Saravanan M, El Salibi N, et al. Evidence from the Lebanon Global School-based Student Health Survey on midwakh tobacco smoking in school students: a harbinger of the next global tobacco pandemic? *Eastern Mediterranean Health Journal*. 2020;26(1):116-21.

1  
2  
3  
4  
5  
6  
7  
8  
9  
10  
11  
12  
13  
14  
15  
16  
17  
18  
19  
20  
21  
22  
23  
24  
25  
26  
27  
28  
29  
30  
31  
32  
33  
34  
35  
36  
37  
38  
39  
40  
41  
42  
43  
44  
45  
46  
47  
48  
49  
50  
51  
52  
53  
54  
55  
56  
57  
58  
59  
60

For peer review only

Figure 1. Overall and gender specific prevalence of current cigarette smoking, waterpipe smoking, dual smoking, and any smoking by country

■ Male ■ Female

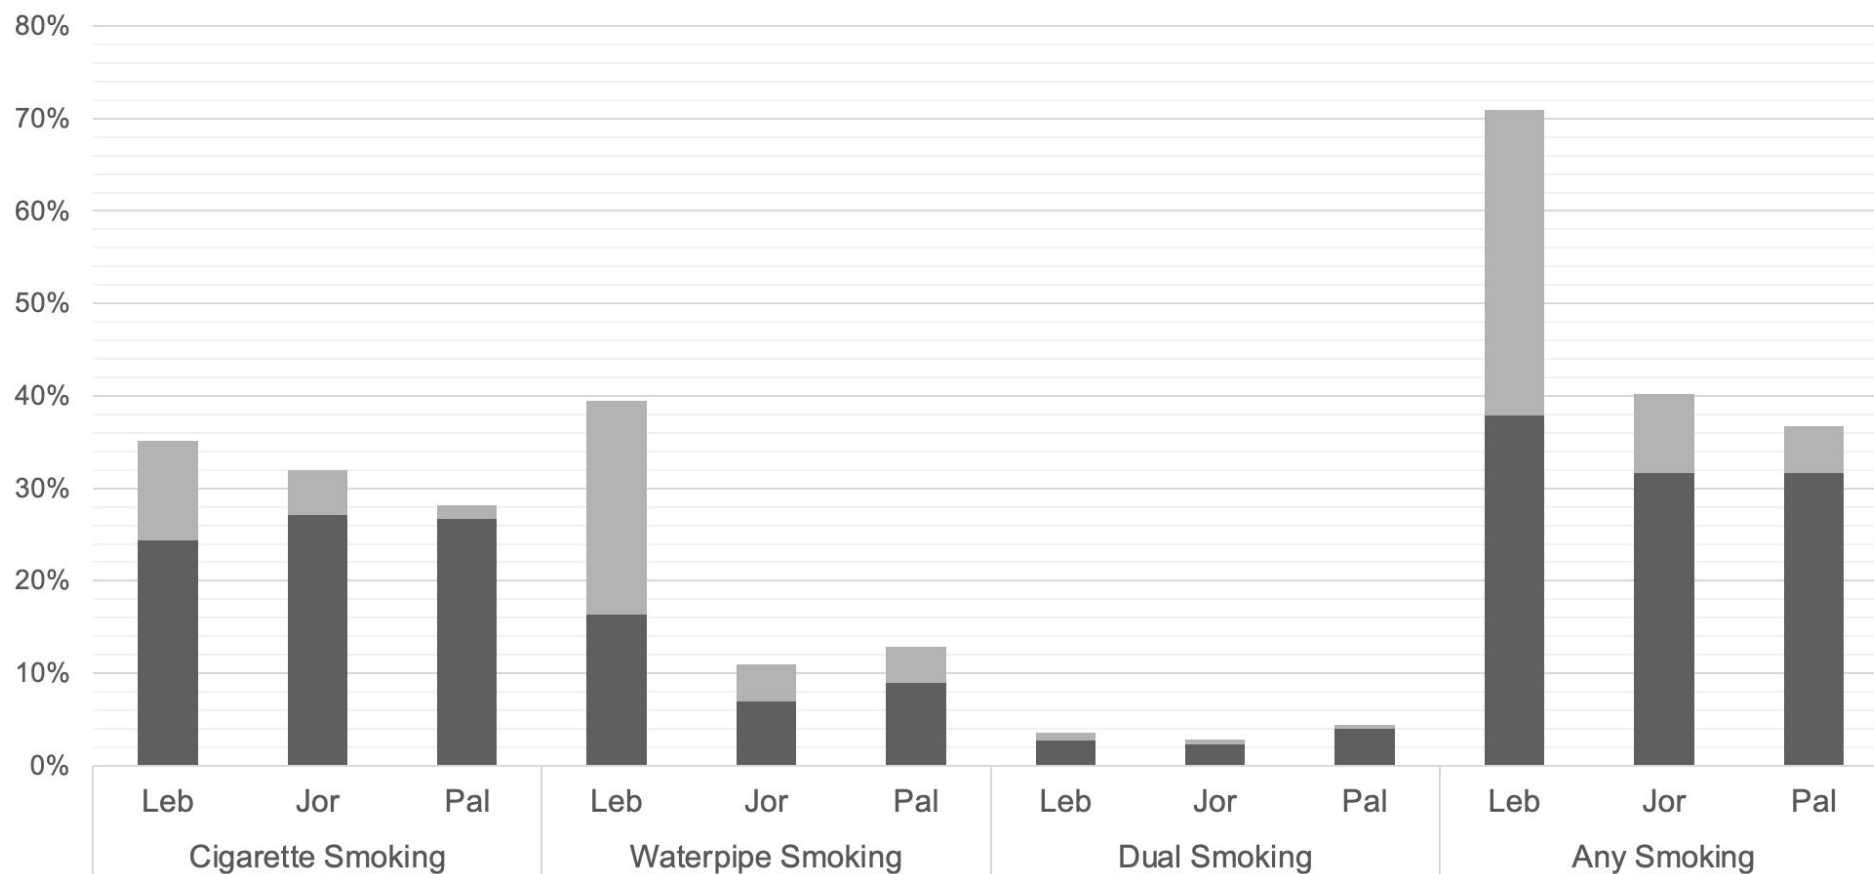

% (95% CI)

|               |                         |                         |                         |                         |                         |                         |                      |                      |                       |                         |                         |                      |
|---------------|-------------------------|-------------------------|-------------------------|-------------------------|-------------------------|-------------------------|----------------------|----------------------|-----------------------|-------------------------|-------------------------|----------------------|
| <b>Male</b>   | 48.6<br>(45.1,<br>52.0) | 50.4<br>(47.4,<br>53.5) | 53.4<br>(50.0,<br>56.8) | 32.7<br>(29.6,<br>36.0) | 13.5<br>(11.5,<br>15.7) | 18.0<br>(15.5,<br>20.8) | 5.5<br>(4.0,<br>7.2) | 4.3<br>(3.2,<br>5.7) | 8.0<br>(6.2,<br>10.0) | 75.8<br>(72.8,<br>78.7) | 59.6<br>(56.6,<br>62.6) | 63.4 (60.0,<br>66.7) |
| <b>Female</b> | 21.5<br>(18.8,<br>24.5) | 9.1<br>(7.3,<br>11.2)   | 3.1<br>(2.0,<br>4.5)    | 46.2<br>(42.8,<br>49.6) | 7.8<br>(6.1,<br>9.8)    | 7.9<br>(6.1,<br>9.9)    | 1.8<br>(1.0,<br>2.9) | 0.8<br>(0.3,<br>1.7) | 0.8<br>(0.3,<br>1.7)  | 66.0<br>(62.6,<br>69.2) | 16.1<br>(13.7,<br>18.7) | 10.1 (8.2,<br>12.4)  |
| <b>Total</b>  | 35.1<br>(32.8,<br>37.4) | 32.0<br>(29.9,<br>34.1) | 28.2<br>(26.1,<br>30.5) | 39.5<br>(37.1,<br>41.8) | 11.0<br>(9.6,<br>12.4)  | 12.9<br>(11.4,<br>14.6) | 3.6<br>(2.8,<br>4.6) | 2.8<br>(2.1,<br>3.6) | 4.4<br>(3.5,<br>5.5)  | 70.9<br>(68.7,<br>73.1) | 40.2<br>(38.0,<br>42.4) | 36.7 (34.4,<br>39.1) |

1  
2  
3  
4  
5  
6  
7  
8  
9  
10  
11  
12  
13  
14  
15  
16  
17  
18  
19  
20  
21  
22  
23  
24  
25  
26  
27  
28  
29  
30  
31  
32  
33  
34  
35  
36  
37  
38  
39  
40  
41  
42  
43  
44  
45  
46  
47

For peer review only

STROBE Statement—Checklist of items that should be included in reports of *cross-sectional studies*

|                                          | Item number | Description                                                                                                                                                                                       | Weight |
|------------------------------------------|-------------|---------------------------------------------------------------------------------------------------------------------------------------------------------------------------------------------------|--------|
| 0-1#%,*+%,23"4,)"%                       | 1           | (a) Indicate the study's design with a commonly used term in the title or the abstract                                                                                                            | 1      |
|                                          |             | (b) Provide in the abstract an informative and balanced summary of what was done and what was found                                                                                               | 2      |
| <b>!"#\$%&amp;'% (#)'\$ \$#*+,-'*\$%</b> |             |                                                                                                                                                                                                   |        |
| Background/rationale                     | 2           | Explain the scientific background and rationale for the investigation being reported                                                                                                              | 3      |
| Objectives                               | 3           | State specific objectives, including any prespecified hypotheses                                                                                                                                  | 4      |
| <b>!"4'+5)"-'*\$%</b>                    |             |                                                                                                                                                                                                   |        |
| Study design                             | 4           | Present key elements of study design early in the paper                                                                                                                                           | 4      |
| Setting                                  | 5           | Describe the setting, locations, and relevant dates, including periods of recruitment, exposure, follow-up, and data collection                                                                   | 4      |
| Participants                             | 6           | (a) Give the eligibility criteria, and the sources and methods of selection of participants                                                                                                       | 4      |
| Variables                                | 7           | Clearly define all outcomes, exposures, predictors, potential confounders, and effect modifiers. Give diagnostic criteria, if applicable                                                          | 5      |
| Data sources/<br>measurement             | 8*          | For each variable of interest, give sources of data and details of methods of assessment (measurement). Describe comparability of assessment methods if there is more than one group              | 5      |
| Bias                                     | 9           | Describe any efforts to address potential sources of bias                                                                                                                                         | 5      |
| Study size                               | 10          | Explain how the study size was arrived at                                                                                                                                                         | 4      |
| Quantitative variables                   | 11          | Explain how quantitative variables were handled in the analyses. If applicable, describe which groupings were chosen and why                                                                      | 5      |
| Statistical methods                      | 12          | (a) Describe all statistical methods, including those used to control for confounding                                                                                                             | 5      |
|                                          |             | (b) Describe any methods used to examine subgroups and interactions                                                                                                                               | 5      |
|                                          |             | (c) Explain how missing data were addressed                                                                                                                                                       | 5      |
|                                          |             | (d) If applicable, describe analytical methods taking account of sampling strategy                                                                                                                | 5      |
|                                          |             | (e) Describe any sensitivity analyses                                                                                                                                                             | 5      |
| <b>(#351"3%</b>                          |             |                                                                                                                                                                                                   |        |
| Participants                             | 13*         | (a) Report numbers of individuals at each stage of study—eg numbers potentially eligible, examined for eligibility, confirmed eligible, included in the study, completing follow-up, and analysed | 4      |
|                                          |             | (b) Give reasons for non-participation at each stage                                                                                                                                              |        |
|                                          |             | (c) Consider use of a flow diagram                                                                                                                                                                |        |



|                                                          |                            |     |                                                                                                                                                                                                                                                                                                                                                                                                                           |                                                                          |
|----------------------------------------------------------|----------------------------|-----|---------------------------------------------------------------------------------------------------------------------------------------------------------------------------------------------------------------------------------------------------------------------------------------------------------------------------------------------------------------------------------------------------------------------------|--------------------------------------------------------------------------|
| 1<br>2<br>3<br>4<br>5<br>6<br>7                          | Descriptive data           | 14* | (a) Give characteristics of study participants (eg demographic, clinical, social) and information on exposures and potential confounders<br><hr/> (b) Indicate number of participants with missing data for each variable of interest                                                                                                                                                                                     | 5 – 6                                                                    |
| 8<br>9                                                   | Outcome data               | 15* | Report numbers of outcome events or summary measures                                                                                                                                                                                                                                                                                                                                                                      | 6-12                                                                     |
| 10<br>11<br>12<br>13<br>14<br>15<br>16<br>17<br>18<br>19 | Main results               | 16  | (a) Give unadjusted estimates and, if applicable, confounder-adjusted estimates and their precision (eg, 95% confidence interval). Make clear which confounders were adjusted for and why they were included<br><hr/> (b) Report category boundaries when continuous variables were categorized<br><hr/> (c) If relevant, consider translating estimates of relative risk into absolute risk for a meaningful time period | 6-12<br><br>p.6 (table 1), p.8 (table 2), p.10 (table 3), p.12 (table 4) |
| 20<br>21<br>22<br>23<br>24                               | Other analyses             | 17  | Report other analyses done—eg analyses of subgroups and interactions, and sensitivity analyses                                                                                                                                                                                                                                                                                                                            | p.6 (table 1), p.8 (table 2),                                            |
| 25                                                       | <b>8-3)533-’*%#</b>        |     |                                                                                                                                                                                                                                                                                                                                                                                                                           |                                                                          |
| 26<br>27                                                 | Key results                | 18  | Summarise key results with reference to study objectives                                                                                                                                                                                                                                                                                                                                                                  | 13                                                                       |
| 28<br>29<br>30<br>31                                     | Limitations                | 19  | Discuss limitations of the study, taking into account sources of potential bias or imprecision. Discuss both direction and magnitude of any potential bias                                                                                                                                                                                                                                                                | 14                                                                       |
| 32<br>33<br>34                                           | Interpretation             | 20  | Give a cautious overall interpretation of results considering objectives, limitations, multiplicity of analyses, results from similar studies, and other relevant evidence                                                                                                                                                                                                                                                | 13                                                                       |
| 35<br>36<br>37                                           | Generalisability           | 21  | Discuss the generalisability (external validity) of the study results                                                                                                                                                                                                                                                                                                                                                     | 13                                                                       |
| 38                                                       | <b>9"7#4!-*:’4\$,-’*%#</b> |     |                                                                                                                                                                                                                                                                                                                                                                                                                           |                                                                          |
| 39<br>40<br>41<br>42                                     | Funding                    | 22  | Give the source of funding and the role of the funders for the present study and, if applicable, for the original study on which the present article is based                                                                                                                                                                                                                                                             | 15                                                                       |

\*Give information separately for exposed and unexposed groups.

&’"#; An Explanation and Elaboration article discusses each checklist item and gives methodological background and published examples of transparent reporting. The STROBE checklist is best used in conjunction with this article (freely available on the Web sites of PLoS Medicine at <http://www.plosmedicine.org/>, Annals of Internal Medicine at <http://www.annals.org/>, and Epidemiology at <http://www.epidem.com/>). Information on the STROBE Initiative is available at [www.strobe-statement.org](http://www.strobe-statement.org).

# BMJ Open

**Title: Prevalence of Cigarette and Waterpipe Tobacco Smoking among Adults in Three Eastern Mediterranean Countries: A cross-sectional household survey**

|                                 |                                                                                                                                                                                                                                                                                                                                                                                                                                                                                                                                                                                                                                                                                                                                                                                                                                                                                                                                                        |
|---------------------------------|--------------------------------------------------------------------------------------------------------------------------------------------------------------------------------------------------------------------------------------------------------------------------------------------------------------------------------------------------------------------------------------------------------------------------------------------------------------------------------------------------------------------------------------------------------------------------------------------------------------------------------------------------------------------------------------------------------------------------------------------------------------------------------------------------------------------------------------------------------------------------------------------------------------------------------------------------------|
| Journal:                        | <i>BMJ Open</i>                                                                                                                                                                                                                                                                                                                                                                                                                                                                                                                                                                                                                                                                                                                                                                                                                                                                                                                                        |
| Manuscript ID                   | bmjopen-2021-055201.R1                                                                                                                                                                                                                                                                                                                                                                                                                                                                                                                                                                                                                                                                                                                                                                                                                                                                                                                                 |
| Article Type:                   | Original research                                                                                                                                                                                                                                                                                                                                                                                                                                                                                                                                                                                                                                                                                                                                                                                                                                                                                                                                      |
| Date Submitted by the Author:   | 13-Dec-2021                                                                                                                                                                                                                                                                                                                                                                                                                                                                                                                                                                                                                                                                                                                                                                                                                                                                                                                                            |
| Complete List of Authors:       | Nakkash, Rima; American University of Beirut Department of Health Promotion and Community Health<br>Khader, Yousef; Jordan University of Science and Technology, Department of Community Medicine, Public Health and Family Medicine, Faculty of Medicine<br>Chalak, Ali; American University of Beirut, Department of Agriculture, Faculty of Agricultural and Food Sciences<br>Abla, Ruba; American University of Beirut, Faculty of Health Sciences<br>Abu-Rmeileh, Niveen; Birzeit University, Institute of Community and Public Health<br>Mostafa, Aya; Ain Shams University Faculty of Medicine, Department of Community, Environmental and Occupational Medicine<br>Jawad, Mohammed; Imperial College London School of Public Health, Public Health Policy Evaluation Unit<br>Lee, Ji-Hyun; University of Florida, Department of Biostatistics and UF Health Cancer Center<br>Salloum, Ramzi; University of Florida, Health Outcomes and Policy |
| <b>Primary Subject Heading</b>: | Public health                                                                                                                                                                                                                                                                                                                                                                                                                                                                                                                                                                                                                                                                                                                                                                                                                                                                                                                                          |
| Secondary Subject Heading:      | Smoking and tobacco                                                                                                                                                                                                                                                                                                                                                                                                                                                                                                                                                                                                                                                                                                                                                                                                                                                                                                                                    |
| Keywords:                       | PUBLIC HEALTH, EPIDEMIOLOGY, Health policy < HEALTH SERVICES ADMINISTRATION & MANAGEMENT                                                                                                                                                                                                                                                                                                                                                                                                                                                                                                                                                                                                                                                                                                                                                                                                                                                               |
|                                 |                                                                                                                                                                                                                                                                                                                                                                                                                                                                                                                                                                                                                                                                                                                                                                                                                                                                                                                                                        |

SCHOLARONE™  
Manuscripts



I, the Submitting Author has the right to grant and does grant on behalf of all authors of the Work (as defined in the below author licence), an exclusive licence and/or a non-exclusive licence for contributions from authors who are: i) UK Crown employees; ii) where BMJ has agreed a CC-BY licence shall apply, and/or iii) in accordance with the terms applicable for US Federal Government officers or employees acting as part of their official duties; on a worldwide, perpetual, irrevocable, royalty-free basis to BMJ Publishing Group Ltd ("BMJ") its licensees and where the relevant Journal is co-owned by BMJ to the co-owners of the Journal, to publish the Work in this journal and any other BMJ products and to exploit all rights, as set out in our [licence](#).

The Submitting Author accepts and understands that any supply made under these terms is made by BMJ to the Submitting Author unless you are acting as an employee on behalf of your employer or a postgraduate student of an affiliated institution which is paying any applicable article publishing charge ("APC") for Open Access articles. Where the Submitting Author wishes to make the Work available on an Open Access basis (and intends to pay the relevant APC), the terms of reuse of such Open Access shall be governed by a Creative Commons licence – details of these licences and which [Creative Commons](#) licence will apply to this Work are set out in our licence referred to above.

Other than as permitted in any relevant BMJ Author's Self Archiving Policies, I confirm this Work has not been accepted for publication elsewhere, is not being considered for publication elsewhere and does not duplicate material already published. I confirm all authors consent to publication of this Work and authorise the granting of this licence.

**Title:** Prevalence of Cigarette and Waterpipe Tobacco Smoking among Adults in Three Eastern Mediterranean Countries: A cross-sectional household survey

**Authors**

Rima Nakkash<sup>1</sup>, Yousef Khader<sup>2</sup>, Ali Chalak<sup>3</sup>, Ruba Abla<sup>1</sup>, Niveen M.E. Abu-Rmeileh<sup>4</sup>, Aya Mostafa<sup>5</sup>, Mohammed Jawad<sup>6</sup>, Ji-Hyun Lee<sup>7</sup>, Ramzi G. Salloum<sup>1,8</sup>

**Affiliations**

1. Department of Health Promotion and Community Health, Faculty of Health Sciences, American University of Beirut, Beirut, Lebanon
2. Department of Community Medicine, Public Health and Family Medicine, Faculty of Medicine, Jordan University of Science and Technology, Irbid, Jordan
3. Department of Agriculture, Faculty of Agricultural and Food Sciences, American University of Beirut, Beirut, Lebanon
4. Institute of Community and Public Health, Birzeit University, Birzeit, Palestine
5. Department of Community, Environmental and Occupational Medicine, Faculty of Medicine, Ain Shams University, Cairo, Egypt
6. Public Health Policy Evaluation Unit, Imperial College London, London, United Kingdom
7. Department of Biostatistics and UF Health Cancer Center, University of Florida, Gainesville, FL, USA
8. Department of Health Outcomes and Biomedical Informatics, College of Medicine, University of Florida, Gainesville, FL, USA

Corresponding Author:

Rima Nakkash

Riad El-Solh / Beirut 1107 2020

American University of Beirut

Email: [rn06@aub.edu.lb](mailto:rn06@aub.edu.lb)

Word count: 3659

Tables/figures: 5 tables

References: 33

## ABSTRACT

**Objectives:** Tobacco smoking is on the rise in the Eastern Mediterranean region. In light of limited surveillance of smoking in the region, this study sought to understand the prevalence of cigarette and waterpipe smoking among adults and the factors associated with smoking in Lebanon, Jordan, and the West Bank.

**Design, setting and participants:** Household surveys were conducted with participants over the age of 18 in Lebanon (n=1680), Jordan (n=1925) and the West Bank (n=1679) between June and August 2019. A multistage cluster sampling approach with probability-proportional-to-size random selection method was followed in the three countries.

**Primary and secondary outcome measures:** Gender-specific prevalence rates and their 95% confidence intervals for cigarette and waterpipe smoking were estimated. Multivariable logistic regression was used to examine factors associated with current cigarette and waterpipe tobacco smoking.

**Results:** The prevalence of cigarette smoking among males and females respectively was 48.6% and 21.5% in Lebanon, 50.4% and 9.1% in Jordan, and 53.4% and 3.1% in the West Bank. The prevalence of waterpipe smoking among males and females respectively was 32.7% and 46.2% in Lebanon, 13.4% and 7.8% in Jordan, and 18.0% and 7.9% in the West Bank. Cigarette smokers were significantly ( $p<0.05$ ) more likely to be male, younger, and with lower educational attainment across the three countries. Waterpipe smokers were more likely to be young adults across the three countries ( $p<0.001$ ). They were more likely to be male in Jordan and the West Bank, and more likely to be female in Lebanon.

**Conclusions:** The high prevalence rates of smoking in Lebanon, Jordan, and the West Bank are concerning. Continued surveillance is key to monitor smoking patterns and inform stronger tobacco control measures.

**Keywords:** cigarette smoking, waterpipe tobacco smoking, smoking prevalence, surveillance

### Strengths and Limitations of the study:

- The study reports contemporary estimates of smoking prevalence using large, nationally representative surveys, that have been consistently lacking in previous studies.
- The study used standardized questionnaires across the three countries, allowing for valid cross-country comparisons.
- Tobacco use was self-reported and not biochemically verified and only a small number of females reported current smoking in Jordan and the West Bank, which may have underreported prevalence.
- The study did not report on use of other alternative smoking products which are increasingly more available in the loosely regulated markets of those countries.

## INTRODUCTION

Smoking is the leading cause of preventable death as well as a main risk factor for cancer, cardiovascular and pulmonary diseases. Although considerable progress has been achieved in curbing the tobacco epidemic in many parts of the world, smoking trends continue to increase in low- and middle-income countries[1]. One notable example has been the Eastern Mediterranean region –which the World Health Organization (WHO) has projected the smoking prevalence to increase by 2025[2]. Cigarette smoking is highly prevalent in the Eastern Mediterranean region, due to weak regulatory environments, insufficient surveillance infrastructure and interference from a strong tobacco industry[3]. The problem is compounded by the wide prevalence of waterpipe tobacco smoking[4]. Waterpipe smoking rates in the region are considered the highest worldwide, with notably high prevalence among young adults[5]. This pattern is attributed to multiple factors, including the perception of waterpipe smoking as a less harmful alternative to cigarette smoking, the café culture encouraging social smoking of the waterpipe, and appeal of flavored waterpipe tobacco[6, 7].

The World Health Organization (WHO) Framework Convention on Tobacco Control requires parties to collect data on tobacco use and exposure on a regular basis to monitor smoking trends and policy implementation[8]. To date, surveillance of tobacco use among adults in the Eastern Mediterranean region has been limited. For example, routinely available data from the Global Adult Tobacco Survey (GATS) are only available in Egypt (2009)[9], Qatar (2013)[10] and Pakistan (2014)[11]. Other surveillance efforts in the region have been limited to specific populations, such as youth[12], university students[13, 14], and healthcare professionals [15]. These limitations in the available smoking prevalence data justify the need for detailed national prevalence data on both cigarette and waterpipe smoking among adults in Eastern Mediterranean countries.

In Lebanon, the most recent national estimates for adult cigarette smoking date back to 2013[2] when the prevalence of current cigarette smoking was 34% among males and 19% among females. The national estimates for waterpipe tobacco smoking prevalence (25.3%) date back to 2009, when the prevalence rate was 26.5% among males and 24.3% among females[16]. According to Jordan STEPS 2019 survey, 65.3% of men and 16.4% of women were current smokers of any tobacco products[17]. As for the West Bank, the most recent national estimates were from the Palestinian Family Survey in 2010, when the prevalence rate for cigarette smoking was 29.9% among adults (49.7% among men and 3.5% among women)[18].

Given that the most recent national prevalence estimates across the three countries date back to one decade, this study sought to estimate contemporary prevalence rates of current cigarette and waterpipe smoking in Lebanon, Jordan, and the West Bank, and their correlates. Further, the issue of dual tobacco use has not been sufficiently explored in studies coming from the region, and as such, this study examined the dual use of cigarette and waterpipe tobacco in these three countries.

## METHODS

### Data source

We conducted nationally-representative in-person cross-sectional household surveys in Lebanon, Jordan, and the West Bank between June and August 2019. Eligible respondents included males

1  
2  
3 and females aged 18 years and older, residing in each of the countries as their primary place of  
4 residence, regardless of nationality.  
5

6  
7 The sample size was calculated to estimate the prevalence of current waterpipe smoking for males  
8 and females in each country based on previously reported prevalence rates [2, 19] with a margin  
9 of error of 5% if the prevalence rate is more than 10% or with a margin of error of half of the  
10 assumed prevalence if it is less than 10%. The average number of individuals or households  
11 sampled per cluster and the design effect were taken into consideration. A design effect of 2.0 was  
12 used based on the recommendations of the Global Adult Tobacco Survey (GATS) manual. With  
13 an 80% power and  $\alpha=0.05$ , the minimum number of clusters needed in the countries ranged from  
14 16 to 28 and the number of subjects ranged from 480 to 840 persons. Since one male and one  
15 female were to be selected from each household, the largest number of clusters and households  
16 (28 clusters and 1680 subjects; 840 men and 840 women) was the sample size for each country.  
17  
18  
19  
20

21 A multistage cluster sampling approach with probability-proportional-to-size random selection  
22 method was followed. In each country, the sample of households was chosen in two stages. First,  
23 well-defined clusters were selected within each governorate (i.e., province). Second, housing  
24 units were selected within each selected cluster. The sampling frame for clusters was specific to  
25 the characteristics of each country. In Lebanon, all eight governorates were selected for  
26 sampling: Akkar, Baalbek-Hermel, Bekaa, Beirut, Mount Lebanon, Nabatieh, North Lebanon,  
27 and South Lebanon. In Jordan, all 12 governorates were included in the study: Ajloun, Amman,  
28 Aqaba, Balqa, Irbid, Jerash, Karak, Ma'an, Madaba, Mafraq, Tafilah, and Zarqa. In the West  
29 Bank, all 11 governorates of the West Bank were selected: Bethlehem, East Jerusalem, Hebron,  
30 Jenin, Qalqilya, Nablus, Ramallah and Al-Bireh, Jericho, Salfit, Tubas, and Tulkarm. The  
31 Palestinian governorates in Gaza were excluded due to logistical barriers. The second stage of  
32 household selection involved choosing a random sample of 30 households from a complete list  
33 of households in a selected area, based on local administrative sources or household lists from  
34 the most recent census. One eligible male and one female resident, who consider the site of data  
35 collection as their primary place of residence, were selected from each selected household. In  
36 Lebanon and Palestine, if an eligible female or male was not available for interview at the time  
37 of household visit, additional households were selected until an equal number of males and  
38 females was reached. In Jordan, additional households were selected that yielded a higher  
39 number of males than females. After eligibility screening, we provided potential respondents  
40 with information about the study and asked them to provide verbal consent to participate as per  
41 IRB approval. With the exception of aforementioned respondent selection, the same methods and  
42 recruitment protocol were used in all three countries.  
43  
44  
45  
46  
47  
48

### 49 **Data collection**

50 Data were collected using the same structured, Arabic-language questionnaire, with selected  
51 questions tailored to local context for each country. In the three countries, the surveys were  
52 administered face-to-face by trained interviewers. Prior to data collection, each country team  
53 pretested the questionnaires with 10-15 individuals of similar characteristics to that of the survey  
54 respondents. Minor amendments to wordings of a few questions were applied. Each country  
55 team then piloted with 10-15 individuals before data collection proceeded. No changes following  
56  
57  
58  
59  
60

1  
2  
3 piloting were needed. Data collectors in the three countries were trained on the ethics of data  
4 collection, consenting, sampling methodology and on the survey questions, using the same  
5 training manual. The training included a review of each questionnaire item, followed by practice  
6 sessions which involved role play as interviewer and interviewee which focused on probing to  
7 make sure all interviewees give full answers to ensure that there is no missing data for the  
8 analysis.  
9

### 10 11 **Measures**

12 Respondents were asked if they had ever tried cigarettes or waterpipe tobacco. Among ever users  
13 of each product, respondents were asked if they were current users of the product. Current  
14 cigarette smoking was defined as currently smoking cigarettes every day or some days.  
15 Similarly, current waterpipe smoking was defined as currently smoking tobacco in a waterpipe  
16 every day or some days. Among current cigarette smokers, respondents were asked about the  
17 number of cigarettes smoked per day. Dual current smokers included both cigarette and  
18 waterpipe smokers while any current smoker included cigarette or waterpipe smokers. Among  
19 current waterpipe tobacco smokers, respondents were asked about the number of waterpipe  
20 sessions they smoked at home per week, the number of waterpipe sessions they smoked in a café  
21 per week, and whether they usually smoked flavored waterpipe tobacco. We assessed the  
22 demographic characteristics of respondents, including their sex, age in years, marital status,  
23 educational attainment, and household monthly income. The survey instrument can be found as  
24 supplementary material.  
25  
26  
27  
28  
29

### 30 31 **Statistical analysis**

32 Descriptive statistics were used to summarize the study participants' demographic and socio-  
33 economic characteristics. We estimated overall gender-specific prevalence rates of cigarettes and  
34 waterpipe smoking and their 95% confidence intervals (CI) within each country. For the purpose  
35 of calculation of age-standardized prevalence rates, the WHO World Standard Population which  
36 reflects the average age structure of the world's population expected over the next generation,  
37 from 2000 to 2025 was used. Multivariable logistic regression analysis was conducted to  
38 examine factors associated with current cigarette smoking and current waterpipe smoking in  
39 separate models for each country. The independent variables tested in these models included  
40 gender (female vs. male), age group in years (18-29, 30-49, 50-64, and 65 or older), educational  
41 attainment (primary school or less, middle school, high school/diploma, and university), marital  
42 status (ever married vs. never married) and individual monthly income (quartiles within each  
43 country). Odds ratios (ORs) and their 95% CIs were estimated from the models. A p-value of  
44 less than 0.05 was considered statistically significant. Respondents with missing data on outcome  
45 measures or covariates were excluded from models on a case-wise basis. Data were analyzed  
46 using Stata statistical software version 16 (StataCorp, College Station, TX).  
47  
48

### 49 50 **Patient and Public Involvement**

51 There was no patient public involvement in the design, conduct, reporting, or dissemination  
52 plans of our research.

### 53 54 **RESULTS**

55 A total of 1,680 respondents in Lebanon, 1,925 in Jordan, and 1,679 in the West Bank completed  
56 the surveys. The non-response rate was 33.9% in Lebanon, 3.7% in Jordan and 7.74% in the  
57  
58  
59



West Bank. Table 1 presents the characteristics of respondents by gender in each country. Females represented 50.0% of the sample in Lebanon, 44.6% in Jordan and 50.0% in the West Bank. Almost 45.1% of respondents in Lebanon, 45.9% of respondents in Jordan, and 41.3% of respondents in the the West Bank were younger than 50 years old. The majority (80.8%) of respondents in Lebanon, 75% of respondents in Jordan and 81.5% of respondents in the West Bank were ever married. Almost one-fifth (20.7%) of respondents in Lebanon, 25.1 % in Jordan, and 16.2 % in the West Bank had completed university education.

Table 1. Socio-demographic characteristics by gender and country 2019

| Variable               | Lebanon         |                   | Jordan           |                   | West Bank       |                   |
|------------------------|-----------------|-------------------|------------------|-------------------|-----------------|-------------------|
|                        | Male<br>(n=840) | Female<br>(n=840) | Male<br>(n=1067) | Female<br>(n=858) | Male<br>(n=839) | Female<br>(n=840) |
|                        | (%) n           | (%) n             | (%) n            | (%) n             | (%) n           | (%) n             |
| <b>Age, in years</b>   |                 |                   |                  |                   |                 |                   |
| 18 – 29                | (22.7) 191      | (29.3) 246        | (26.4) 282       | (27.7) 238        | (32.9) 276      | (25.7) 216        |
| 30 – 49                | (44.5) 374      | (45.7) 384        | (45.2) 482       | (46.6) 400        | (37.8) 317      | (44.8) 376        |
| 50 – 64                | (28.3) 238      | (23.2) 195        | (19.9) 212       | (18.9) 162        | (25.4) 213      | (28.6) 240        |
| ≥65                    | (4.4) 37        | (1.8) 15          | (8.5) 91         | (6.8) 58          | (3.9) 33        | (1.0) 8           |
| <b>Marital Status</b>  |                 |                   |                  |                   |                 |                   |
| Never married          | (20.4) 170      | (18.1) 153        | (25.0) 210       | (12.1) 102        | (22.1) 185      | (8.2) 69          |
| Ever married           | (79.8) 670      | (81.8) 687        | (75.0) 629       | (75.0) 738        | (75.0) 629      | (87.9) 738        |
| <b>Education</b>       |                 |                   |                  |                   |                 |                   |
| Primary school or less | (17.4) 146      | (11.9) 100        | (22.3) 238       | (24.0) 206        | (44.3) 372      | (50.4) 423        |
| Middle school          | (21.7) 182      | (21.3) 179        | (41.1) 439       | (36.6) 314        | (33.7) 283      | (25.8) 217        |
| High school/diploma    | (40.0) 336      | (46.4) 390        | (12.0) 128       | (13.9) 119        | (7.5) 63        | (5.9) 50          |
| University             | (21.0) 176      | (20.4) 171        | (24.6) 262       | (25.5) 219        | (14.4) 121      | (17.9) 150        |
| <b>Monthly Income*</b> |                 |                   |                  |                   |                 |                   |
| Quartile 1             | (7.51) 62       | (9.1) 75          | (21.7) 227       | (24.9) 207        | (21.2) 174      | (26.6) 214        |
| Quartile 2             | (39.5) 326      | (38.8) 321        | (39.4) 411       | (38.5) 320        | (41.9) 344      | (44.0) 355        |
| Quartile 3             | (39.1) 323      | (38.7) 320        | (25.1) 262       | (23.7) 197        | (19.8) 163      | (16.5) 133        |
| Quartile 4             | (13.9) 115      | (13.4) 111        | (13.8) 144       | (12.9) 107        | (17.0) 140      | (12.9) 104        |
| No income              | (1.7) 14        | (1.6) 13          | (2.2) 23         | (3.2) 27          | (2.2) 18        | (4.0) 34          |

\*Income quartile levels: **Lebanon:** [1] <\$529.88; [2] \$529.88 - < \$993.53; [3] \$993.53 - < \$1,987.05; [4] ≥ \$1,987.05. **Jordan:** [1] < \$423.13; [2] \$423.13 = < \$705.22; [3] \$705.22 - < \$1,269.39. **West Bank:** [1] < \$610.04; \$610.04 - < \$1,067.57; [3] \$1,067.57 - < \$1,525.10; [4] ≥ 1,525.10.

### Prevalence of cigarette and waterpipe tobacco smoking

Table 2 shows the crude and age-standardized prevalence rates of current cigarette smoking, current waterpipe smoking, dual smoking and any smoking, by country. Overall, the crude prevalence rate (95% CI) for current cigarette smoking was 35.1% (32.8, 37.4) in Lebanon, 32.0% (29.9, 34.1) in Jordan and 28.2% (26.1, 30.5) in the West Bank. The prevalence rate for

current waterpipe smoking was 39.5% (37.1, 41.8) in Lebanon, 11.0% (9.6, 12.4) in Jordan, and 12.9% (11.4, 14.6) in the West Bank. The overall rate for dual current smoking was 3.6% (2.8, 4.6) in Lebanon, 2.8% (2.1, 3.6) in Jordan, and 4.4% (3.5, 5.5) in the West Bank. As for any current smoking, the prevalence rate was 70.9% (68.7, 73.1) in Lebanon, 40.2% (38.0, 42.4) in Jordan, and 36.7% (34.4, 39.1) in the West Bank. Respectively, the age standardized prevalence rates of current cigarette and waterpipe smoking were 27.8% and 38.1% in Lebanon, 25.5% and 12.0% in Jordan, and 26.3% and 14.1% in the West Bank.

Table 2. Crude and age-standardized prevalence rates (ASR) and their 95% confidence intervals (CI) of current cigarette smoking, current waterpipe smoking, dual smoking, and any smoking in Lebanon, Jordan, and the West Bank, 2019.

| Country/<br>gender   | Current cigarette smoking |                      | Current waterpipe smoking |                      | Dual smoking       |                   | Any Smoking          |                      |
|----------------------|---------------------------|----------------------|---------------------------|----------------------|--------------------|-------------------|----------------------|----------------------|
|                      | Crude<br>(95% CI)         | ASR<br>(95% CI)      | Crude<br>(95% CI)         | ASR<br>(95% CI)      | Crude<br>(95% CI)  | ASR<br>(95% CI)   | Crude<br>(95% CI)    | ASR (95%<br>CI)      |
| <b>Lebanon</b>       |                           |                      |                           |                      |                    |                   |                      |                      |
| Male                 | 48.6<br>(45.1, 52.0)      | 38.6<br>(30.9, 46.4) | 32.7<br>(29.6, 36.0)      | 35.6<br>(26.4, 44.7) | 5.5<br>(4.0, 7.2)  | 5.8<br>(2.1, 9.6) | 75.8<br>(72.8, 78.7) | 68.4<br>(57.0, 79.8) |
| Female               | 21.5<br>(18.8, 24.5)      | 15.9<br>(11.3, 20.5) | 46.2<br>(42.8, 49.6)      | 39.8<br>(29.4, 50.3) | 1.8<br>(1.0, 2.9)  | 0.9<br>(0.4, 1.3) | 66.0<br>(62.6, 69.2) | 54.9<br>(43.5, 66.3) |
| Total                | 35.1<br>(32.8, 37.4)      | 27.8<br>(22.9, 32.6) | 39.5<br>(37.1, 41.8)      | 38.1<br>(31.2, 44.9) | 3.6<br>(2.8, 4.6)  | 3.6<br>(1.4, 5.7) | 70.9<br>(68.7, 73.1) | 62.3<br>(54.1, 70.4) |
| <b>Jordan</b>        |                           |                      |                           |                      |                    |                   |                      |                      |
| Male                 | 50.4<br>(47.4, 53.5)      | 39.7<br>(32.9, 46.4) | 13.5<br>(11.5, 15.7)      | 15.1<br>(9.4, 20.7)  | 4.3<br>(3.2, 5.7)  | 4.6<br>(1.6, 7.6) | 59.6<br>(56.6, 62.6) | 50.1<br>(41.9, 58.3) |
| Female               | 9.1<br>(7.3, 11.2)        | 8.0<br>(4.2, 11.8)   | 7.8<br>(6.1, 9.8)         | 8.3<br>(3.8, 12.9)   | 0.8<br>(0.3, 1.7)  | 0.5<br>(0.1, 0.9) | 16.1<br>(13.7, 18.7) | 15.9<br>(10.0, 21.8) |
| Total                | 32.0<br>(29.9, 34.1)      | 25.5<br>(21.4, 29.6) | 11.0<br>(9.6, 12.4)       | 12.0<br>(8.3, 15.7)  | 2.8<br>(2.1, 3.6)  | 2.8<br>(1.1, 4.4) | 40.2<br>(38.0, 42.4) | 34.8<br>(29.6, 40.0) |
| <b>West<br/>Bank</b> |                           |                      |                           |                      |                    |                   |                      |                      |
| Male                 | 53.4<br>(50.0, 56.8)      | 45.0<br>(37.5, 52.6) | 18.0<br>(15.5, 20.8)      | 16.6<br>(11.5, 21.7) | 8.0<br>(6.2, 10.0) | 6.4<br>(3.5, 9.2) | 63.4<br>(60.0, 66.7) | 55.3<br>(46.6, 63.9) |
| Female               | 3.1<br>(2.0, 4.5)         | 1.6<br>(1.0, 2.3)    | 7.9<br>(6.1, 9.9)         | 12.2<br>(4.6, 19.9)  | 0.8<br>(0.3, 1.7)  | 0.5<br>(0.1, 0.9) | 10.1<br>(8.2, 12.4)  | 13.4<br>(5.7, 21.0)  |
| Total                | 28.2<br>(26.1, 30.5)      | 26.3<br>(21.2, 31.4) | 12.9<br>(11.4, 14.6)      | 14.1<br>(9.9, 18.2)  | 4.4<br>(3.5, 5.5)  | 3.8<br>(2.0, 5.7) | 36.7<br>(34.4, 39.1) | 36.5<br>(30.3, 42.8) |

### Patterns of cigarette and waterpipe smoking

Table 3 presents the patterns of cigarette and waterpipe smoking among current smokers according to gender and country. In Lebanon, almost half of current cigarette smokers reported smoking  $\geq 20$  cigarettes per day (42.6% of males and 51.9% of females). In Jordan, more than half of male current cigarette smokers (52.0%) and one third of female cigarette smokers (33.3%) reported smoking  $\geq 20$  cigarettes per day. In the West Bank, among those who currently smoke cigarettes, 37.5% of males and 3.8% of females reported smoking  $\geq 20$  cigarettes per day.

The majority of waterpipe smokers in Lebanon used flavored tobacco (86.2% of males and 89.2% of females), smoked more than 3 sessions at home (92.5% of males and 86.9% of females) and smoked three sessions or less per week in a café (90.0% of males and 96.3% of

females). In Jordan, the majority of waterpipe smokers used flavored tobacco (92.3% of males and 98.5% of females), the majority of male respondents (70.5%) and less than half of females (46.9%) smoked more than three waterpipe sessions at home, and the majority of respondents smoked three sessions or less per week in a café (62.9% of males and 85.7% of females). In the West Bank, the majority of waterpipe smokers used flavored tobacco (94.6% of males and 93.9% of females), 85.7% of males and 95.4% of females smoked more than 3 sessions of waterpipe at home, and 97.7% of males and 95.5% of females smoked three sessions or less per week in a café.

Table 3. Patterns of cigarette and waterpipe smoking among current smokers according to gender by country in 2019

| Variable                                | Lebanon        |                | Jordan         |               | West Bank      |               |
|-----------------------------------------|----------------|----------------|----------------|---------------|----------------|---------------|
|                                         | Males          | Females        | Males          | Females       | Males          | Females       |
|                                         | (%) n          | (%) n          | (%) n          | (%) n         | (%) n          | (%) n         |
| Cigarettes per day                      |                |                |                |               |                |               |
| <10                                     | (35.0) 143     | (34.8) 63      | (3.4) 18       | (18.0) 14     | (9.4) 42       | (23.1) 6      |
| 10 – 20                                 | (42.6) 174     | (51.9) 94      | (44.6) 240     | (48.7) 38     | (53.1) 238     | (73.1) 19     |
| >20                                     | (22.3) 91      | (13.3) 24      | (52.0) 280     | (33.3) 26     | (37.5) 168     | (3.8) 1       |
| Total                                   | (100.0)<br>408 | (100.0)<br>181 | (100.0)<br>538 | (100.0)<br>78 | (100.0)<br>448 | (100.0)<br>26 |
| Waterpipe sessions at home,<br>per week |                |                |                |               |                |               |
| ≤3                                      | (7.5) 19       | (13.1) 49      | (29.5) 33      | (53.1) 34     | (85.7) 108     | (95.4) 62     |
| >3                                      | (92.5) 234     | (86.9) 326     | (70.5) 79      | (46.9) 30     | (14.3) 18      | (4.6) 3       |
| Waterpipe sessions at café, per<br>week |                |                |                |               |                |               |
| ≤3                                      | (90.9) 180     | (96.3) 236     | (62.9) 22      | (85.7) 6      | (97.7) 85      | (95.5) 21     |
| >3                                      | (9.1) 18       | (3.7) 9        | (37.1) 13      | (14.3) 1      | (2.3) 2        | (4.5) 1       |
| Type of waterpipe tobacco<br>smoked     |                |                |                |               |                |               |
| Flavored                                | (86.2) 237     | (89.2) 346     | (92.3) 132     | (98.5) 66     | (94.6) 141     | (93.9) 62     |
| Non-flavored                            | (13.8) 38      | (10.8) 42      | (7.7) 11       | (1.5) 1       | (5.4) 8        | (6.1) 4       |

### Factors associated with current cigarette smoking

Table 4 presents the results of the multivariable analysis of factors associated with current cigarette smoking by country. In Lebanon, males were more likely than females to be current cigarette smokers (OR: 5.07; 95% CI: 3.73, 6.89). Compared with young adults 18-29 years old, respondents who were older were more likely to be current smokers: (OR: 5.52; 95% CI: 3.22, 9.49) among those 30-49 years old, (OR: 6.34; 95% CI: 3.57, 11.26) among adults 50-64 years old, and (OR: 2.84; 95% CI: 1.15, 7.05) among adults  $\geq 65$  years old. Compared with adults who had a primary school education or less, adults with a high school education (OR: 0.44; 95% CI: 0.27, 0.72) and those with a university education (OR: 0.52; 95% CI: 0.29, 0.92) were significantly less likely to be current cigarette smokers.

In Jordan, males were significantly more likely than females to be current cigarette smokers (OR: 13.77; 95% CI: 9.29, 20.44). Adults  $\geq 65$  years old were less likely than those 18-29 years old to be current cigarette smokers (OR: 0.35; 95% CI: 0.19, 0.65). Compared with adults who had a primary school education or less, adults with a high school education (OR: 0.61; 95% CI: 0.38, 0.97) and those with a university education (OR: 0.61; 95% CI: 0.41, 0.91) were less likely to be current cigarette smokers. In addition, adults in the highest income quartile were significantly more likely to be current smokers compared with adults in the lowest income quartile (OR: 1.68; 95% CI: 1.05, 2.69).

Finally, in the West Bank, males were also significantly more likely than females to be current cigarette smokers (OR: 66.95; 95% CI: 29.28, 153.10). Adults  $\geq 65$  years old were less likely than those 18-29 years old to be cigarette smokers (OR: 0.33; 95% CI: 0.12, 0.88). Compared to adults with a primary school education or less, adults with a middle school education (OR: 0.58; 95% CI: 0.39, 0.84) and those with a university education (OR: 0.57; 95% CI: 0.35, 0.93) were significantly less likely to be current cigarette smokers.

Table 4. Multivariable analysis of factors associated with current cigarette smoking among adults by country in 2019

| Variable               | Lebanon            |        | Jordan              |        | West Bank             |        |
|------------------------|--------------------|--------|---------------------|--------|-----------------------|--------|
|                        | OR (95% CI)        | p      | OR (95% CI)         | p      | OR (95% CI)           | p      |
| <b>Gender</b>          |                    |        |                     |        |                       |        |
| Female                 | reference          |        | reference           |        | reference             |        |
| Male                   | 5.07 (3.73, 6.89)  | <0.001 | 13.77 (9.29, 20.44) | <0.001 | 66.95 (29.28, 153.10) | <0.001 |
| <b>Age, in years</b>   |                    |        |                     |        |                       |        |
| 18 – 29                | reference          |        | reference           |        | reference             |        |
| 30 – 49                | 5.52 (3.22, 9.49)  | <0.001 | 1.06 (0.77, 1.54)   | 0.76   | 1.43 (0.89, 2.27)     | 0.13   |
| 50 – 64                | 6.34 (3.57, 11.26) | <0.001 | 0.89 (0.57, 1.37)   | 0.59   | 1.64 (0.38, 1.05)     | 0.08   |
| $\geq 65$              | 2.84 (1.15, 7.05)  | 0.024  | 0.35 (0.19, 0.65)   | 0.001  | 0.33 (0.12, 0.88)     | 0.03   |
| <b>Education</b>       |                    |        |                     |        |                       |        |
| Primary school or less | reference          |        | reference           |        | reference             |        |
| Middle school          | 0.94 (0.58, 1.52)  | 0.79   | 0.83 (0.59, 1.17)   | 0.31   | 0.58 (0.39, 0.84)     | <0.001 |
| High school/diploma    | 0.44 (0.27, 0.72)  | 0.001  | 0.61 (0.38, 0.97)   | 0.04   | 0.68 (0.37, 1.26)     | 0.22   |
| University             | 0.52 (0.29, 0.92)  | 0.02   | 0.61 (0.41, 0.91)   | 0.02   | 0.57 (0.35, 0.93)     | 0.03   |

| Marital Status  |                   |      |                   |      |                   |      |
|-----------------|-------------------|------|-------------------|------|-------------------|------|
| Not Married     | reference         |      | reference         |      | reference         |      |
| Married         | 0.61 (0.36, 1.02) | 0.06 | 1.18 (0.83, 1.67) | 0.35 | 1.12 (0.69, 1.80) | 0.64 |
| Monthly Income* |                   |      |                   |      |                   |      |
| Quartile 1      | reference         |      | reference         |      | reference         |      |
| Quartile 2      | 1.09 (0.60, 2.01) | 0.77 | 1.42 (1.00, 2.03) | 0.05 | 0.83 (0.54, 1.26) | 0.37 |
| Quartile 3      | 1.06 (0.56, 2.00) | 0.87 | 1.46 (0.99, 2.15) | 0.06 | 1.17 (0.71, 1.93) | 0.54 |
| Quartile 4      | 1.61 (0.76, 3.40) | 0.21 | 1.68 (1.05, 2.69) | 0.03 | 0.62 (0.36, 1.06) | 0.08 |
| No income       | 1.54 (0.44, 5.40) | 0.50 | 0.98 (0.41, 2.36) | 0.96 | 0.37 (0.12, 1.21) | 0.10 |

\*Income quartile levels: **Lebanon:** [1] <\$529.88; [2] \$529.88 - < \$993.53; [3] \$993.53 - < \$1,987.05; [4] ≥ \$1,987.05. **Jordan:** [1] < \$423.13; [2] \$423.13 = < \$705.22; [3] \$705.22 - < \$1,269.39. **West Bank:** [1] < \$610.04; \$610.04 - < \$1,067.57; [3] \$1,067.57 - < \$1,525.10; [4] ≥ 1,525.10.

### Factors associated with current waterpipe tobacco smoking

Table 5 presents the results of multivariable analysis of factors associated with current waterpipe tobacco smoking by country. In Lebanon, males were less likely than females to be current waterpipe smokers (OR: 0.49; 95% CI: 0.37, 0.64). In addition, adults older than 18-29 years old were less likely to be current waterpipe smokers: (OR: 0.30; 95% CI: 0.18, 0.49) among 30-49 years old, (OR: 0.08; 95% CI: 0.04, 0.15) among 50-64 years old, and (OR: 0.03; 95% CI: 0.01, 0.14). Compared to adults with a primary school education or less, adults with a high school education were more likely to be waterpipe smokers (OR: 1.87; 95% CI: 1.05, 3.34). Compared with adults in the lowest income quartile, those in the second (OR: 2.50; 95% CI: 1.19, 5.26) and third (OR: 2.45; 95% CI: 1.13, 5.30) quartiles were more likely to be current waterpipe smokers.

In Jordan, males were more likely than females to be current waterpipe smokers (OR: 1.92; 95% CI: 1.40, 2.62). Compared with adults 18-29 years old, older adults were less likely to be waterpipe smokers: (OR: 0.66; 95% CI: 0.44, 0.99) among those 30-49 years old, (OR: 0.45; 95% CI: 0.27, 0.75) among those 50-64 years old, and (OR: 0.07; 95% CI: 0.02, 0.31) among those ≥65 years old.

Similarly, in the West Bank, males were more likely than females to be current waterpipe smokers (OR: 2.69; 95% CI: 1.85, 3.92). Compared with adults 18-29 years old, older adults were less likely to be waterpipe smokers: (OR: 0.48; 95% CI: 0.30, 0.77) among adults 30-49 years old, (OR: 0.19; 95% CI: 0.09, 0.35) among adults 50-64 years old, and (OR: 0.19; 95% CI: 0.05, 0.77) among adults ≥65 years old.

Table 5. Multivariable analysis of factors associated with current waterpipe smoking among adults by country in 2019

| Variable | Lebanon           |        | Jordan            |        | West Bank         |        |
|----------|-------------------|--------|-------------------|--------|-------------------|--------|
|          | OR (95% CI)       | p      | OR (95% CI)       | p      | OR (95% CI)       | p      |
| Gender   |                   |        |                   |        |                   |        |
| Female   | reference         |        | reference         |        | reference         |        |
| Male     | 0.49 (0.37, 0.64) | <0.001 | 1.92 (1.40, 2.62) | <0.001 | 2.69 (1.85, 3.92) | <0.001 |

|                        |                   |        |                   |        |                   |        |
|------------------------|-------------------|--------|-------------------|--------|-------------------|--------|
| <b>Age, in years</b>   |                   |        |                   |        |                   |        |
| 18 – 29                | reference         |        | reference         |        | reference         |        |
| 30 – 49                | 0.30 (0.18, 0.49) | <0.001 | 0.66 (0.44, 0.99) | 0.04   | 0.48 (0.30, 0.77) | 0.002  |
| 50 – 64                | 0.08 (0.04, 0.15) | <0.001 | 0.45 (0.27, 0.75) | 0.02   | 0.19 (0.09, 0.35) | <0.001 |
| ≥65                    | 0.03 (0.01, 0.14) | <0.001 | 0.07 (0.02, 0.31) | <0.001 | 0.19 (0.05, 0.77) | 0.02   |
| <b>Education</b>       |                   |        |                   |        |                   |        |
| Primary school or less | reference         |        | reference         |        | reference         |        |
| Middle school          | 1.03 (0.58, 1.86) | 0.91   | 1.34 (0.87, 2.08) | 0.18   | 1.37 (0.90, 2.10) | 0.14   |
| High school/diploma    | 1.87 (1.05, 3.34) | 0.03   | 1.14 (0.64, 2.02) | 0.65   | 1.72 (0.84, 3.51) | 0.14   |
| University             | 1.90 (0.98, 3.69) | 0.06   | 1.19 (0.73, 1.95) | 0.47   | 1.26 (0.75, 2.13) | 0.39   |
| <b>Marital Status</b>  |                   |        |                   |        |                   |        |
| Not Married            | reference         |        | reference         |        | reference         |        |
| Married                | 1.54 (0.91, 2.63) | 0.11   | 1.06 (0.71, 1.58) | 0.76   | 0.66 (0.41, 1.06) | 0.08   |
| <b>Monthly Income*</b> |                   |        |                   |        |                   |        |
| Quartile 1             | reference         |        | reference         |        | reference         |        |
| Quartile 2             | 2.50 (1.19, 5.26) | 0.02   | 0.75 (0.49, 1.14) | 0.18   | 0.71 (0.43, 1.18) | 0.18   |
| Quartile 3             | 2.45 (1.13, 5.30) | 0.02   | 1.05 (0.67, 1.66) | 0.82   | 0.89 (0.49, 1.61) | 0.50   |
| Quartile 4             | 1.93 (0.79, 4.74) | 0.15   | 1.44 (0.87, 2.37) | 0.16   | 1.20 (0.66, 2.20) | 0.66   |
| No income              | 1.27 (0.28, 5.84) | 0.76   | 1.01 (0.37, 2.75) | 0.98   | 0.72 (0.22, 2.37) | 0.22   |

\*Income quartile levels: **Lebanon:** [1] <\$529.88; [2] \$529.88 - < \$993.53; [3] \$993.53 - < \$1,987.05; [4] ≥ \$1,987.05. **Jordan:** [1] < \$423.13; [2] \$423.13 = < \$705.22; [3] \$705.22 - < \$1,269.39. **West Bank:** [1] < \$610.04; \$610.04 - < \$1,067.57; [3] \$1,067.57 - < \$1,525.10; [4] ≥ 1,525.10.

## DISCUSSION

This study provides contemporary estimates of the prevalence and patterns of cigarette and waterpipe smoking among adults in Lebanon, Jordan and the West Bank using nationally representative surveys. Findings from the study raise renewed concerns over tobacco use in these countries, which have some of the highest smoking prevalence rates globally: more than two in three adults in Lebanon are current smokers of combustible tobacco products, and almost two-thirds of adult males in Jordan and the West Bank are also current smokers. Generally, males were more likely to be current smokers than females. However, almost half of adult females were current waterpipe smokers in Lebanon, exceeding by 40% the prevalence among adult males in that country.

Our study showed comparable results to previously reported prevalence estimates of current cigarette smoking in Lebanon. We report slightly higher estimates for males and females compared to the most recent published estimates where the rates of current cigarette smoking for males and females was 34% and 19%, respectively[2]. As for waterpipe tobacco smoking, our study reports a higher prevalence particularly among females when compared to the latest reported rate of 24.3%[16]. This may be partially explained by the fact that waterpipe smoking is increasingly becoming a socially normative behavior and remains poorly unregulated, widely available and affordable in Lebanon[20].

1  
2  
3 In Jordan, our prevalence estimate of current smoking of any tobacco products among men  
4 (50.1%) was lower than the previously reported rate (65.3%) in the STEP 2019. Among  
5 Jordanian women, our estimate (15.9%) was consistent with the STEP 2019 estimate (16.4%).  
6 [17]. In the West Bank, adult prevalence estimates of cigarette smoking among males were  
7 markedly higher than previously reported estimates of 49.7%, while for females it was relatively  
8 similar, 3.5%[18]. We compare here our findings with previously reported prevalence rates in the  
9 three countries, bearing in mind that the methodologies of cited studies might not be comparable.  
10  
11

12 The gender- and age-specific prevalence rates of cigarette and waterpipe tobacco smoking are  
13 generally consistent with previous findings in the three countries[3]. Females in Lebanon had the  
14 highest prevalence of waterpipe smoking whereas males in the West Bank had the highest  
15 prevalence of cigarette smoking across the three countries. Young adults across all three  
16 countries were more likely to smoke waterpipe tobacco in line with previous reports that  
17 waterpipe smoking has become widespread among young adults which is also consistent with  
18 reported global trends[4, 14, 21, 22]. This may be attributable to the fact that waterpipe smoking  
19 is widely perceived to be less harmful than cigarette smoking among young people[6].  
20  
21

22 Patterns of smoking were different among current cigarette smokers across the three countries.  
23 More than one-third of males and females in Lebanon were light smokers, averaging less than  
24 ten cigarettes per day. In contrast, only 3.4% of males and 18.0% of females who were current  
25 cigarette smokers in Jordan were light smokers. Similarly, in the West Bank, 9.4% of males and  
26 23.1% of females were light smokers. These patterns, combined with the high overall prevalence  
27 rates of cigarette smoking, may be suggestive that for a significant proportion of smokers,  
28 cigarette smoking may be regarded more as a social behavior, especially in Lebanon.  
29 Alternatively, almost all male smokers in Jordan were heavy smokers, suggesting higher levels  
30 of addiction, with relevant implications for improving the use of existing smoking cessation  
31 services in Jordan. [21].  
32  
33  
34

35 Finally, it is important to highlight that across all three countries, the overwhelmingly majority of  
36 current waterpipe smokers use flavored tobacco, as previously reported in other countries in the  
37 EMR. In a study by Hamadeh et al (2021), out of the 2470 students that participated in the study  
38 from Egypt, Jordan, Palestine and the United Arab Emirates, the majority of male and female  
39 students smoked flavored waterpipe tobacco[23]. This was also observed in Iran where 56% of  
40 smokers used flavored waterpipe tobacco. [24]This pattern may be attributed to increased  
41 availability of flavored tobacco products, affordability, their unregulated marketing, as well as  
42 poor and often misleading labeling [5] calling for the need to consider banning of flavoring in  
43 tobacco as a potentially strong regulatory measure[25].  
44  
45  
46

47 Strengths of this study include the fact that it reports contemporary estimates of smoking  
48 prevalence using large, nationally representative surveys, that have been consistently lacking in  
49 previous studies. The study used standardized questionnaires across the three countries, allowing  
50 for valid cross-country comparisons. Study limitations include the fact that tobacco use was self-  
51 reported and not biochemically verified, which may underreport prevalence. In addition, only a  
52 small number of females reported current smoking in Jordan and the West Bank. These small  
53 sample sizes may have resulted in unreliable estimates of the detailed patterns of cigarette and  
54 waterpipe smoking reported for females in the two countries. The study also did not report on  
55  
56  
57  
58  
59  
60

1  
2  
3 use of other alternative smoking products such as electronic cigarettes[17, 26], heated tobacco,  
4 and midwakh [27, 28], which are increasingly more available in the loosely regulated markets of  
5 those countries.  
6

## 7 8 **CONCLUSION**

9 The alarmingly high prevalence of tobacco smoking in Lebanon, Jordan, and the West Bank  
10 highlights the immediate need to strengthen existing tobacco control policies, especially those  
11 that address waterpipe tobacco smoking. Regulations should address waterpipe tobacco smoking  
12 in relation to all articles of the FCTC (taxation, packaging and labelling, cessation, etc)[29].  
13 Regulations should also be informed by a growing body of research in Lebanon, Jordan, and the  
14 West Bank evaluating waterpipe specific intervention for effectiveness[30-33] This should be  
15 coupled with regular monitoring of tobacco trends using surveillance data such as the ones  
16 reported in this study in order to evaluate progress at national level. Findings from this research  
17 provide policy makers with evidence that can support them in calling for improved policies and  
18 measures to curb tobacco use.  
19  
20  
21  
22  
23  
24  
25  
26  
27  
28  
29  
30  
31  
32  
33  
34  
35  
36  
37  
38  
39  
40  
41  
42  
43  
44  
45  
46  
47  
48  
49  
50  
51  
52  
53  
54  
55  
56  
57  
58  
59  
60



## ACKNOWLEDGEMENTS

### Contributors

YK led the study design. RN, YK, and NAR monitored data collection. YK, MJ and AC were responsible for data analysis. RN, RA, and RS wrote the first draft. YK, AC, NAR, MJ, AM, and JL contributed to successive drafts. All authors approved the final manuscript.

### Funding

This study was funded by the International Development Research Centre (Grant number 108821).

### Disclaimer

The funding agency played no role in study design, in the collection, analysis and interpretation of data, in the writing of the report and in the decision to submit the article for publication. The content is solely the responsibility of the authors and does not necessarily represent the official views of the funding agency.

### Ethics approval

This study involves human participants and was approved by the Institutional Boards at the American University of Beirut (SBS-2019-0097), Jordan University of Science and Technology (14/119/2018), and Birzeit University (2019 (1-1)).

### Conflict of Interests

None declared.

### Data Availability Statement

Data are available upon reasonable request.

## REFERENCES

1. WHO. WHO REPORT ON THE GLOBAL TOBACCO EPIDEMIC, 2021: Addressing new and emerging products. 2021.
2. WHO. WHO global report on trends in prevalence of tobacco smoking 2000-2025: World Health Organization; 2018.
3. Maziak W, Nakkash R, Bahelah R, Husseini A, Fanous N, Eissenberg T. Tobacco in the Arab world: old and new epidemics amidst policy paralysis. *Health Policy Plan.* 2014;29(6):784-94.
4. Akl EA, Gunukula SK, Aleem S, Obeid R, Jaoude PA, Honeine R, et al. The prevalence of waterpipe tobacco smoking among the general and specific populations: a systematic review. *BMC Public Health.* 2011;11:244.
5. Maziak W, Taleb ZB, Bahelah R, Islam F, Jaber R, Auf R, et al. The global epidemiology of waterpipe smoking. *Tob Control.* 2015;24 Suppl 1:i3-i12.
6. Akl EA, Ward KD, Bteddini D, Khaliel R, Alexander AC, Lotfi T, et al. The allure of the waterpipe: a narrative review of factors affecting the epidemic rise in waterpipe smoking among young persons globally. *Tob Control.* 2015;24 Suppl 1:i13-i21.
7. Salloum RG, Nakkash R, Abu-Rmeileh NME, Hamadeh RR, Darawad MW, Kheirallah KA, et al. Individual-level determinants of waterpipe smoking demand in four Eastern-Mediterranean countries. *Health Promot Int.* 2019;34(6):1157-66.
8. WHO. WHO report on the global tobacco epidemic, 2008: the MPOWER package. Geneva, Switzerland: World Health Organization; 2008.
9. WHO. Global Adult Tobacco Survey: Egypt Country Report 2009. 2009.
10. WHO. Global Adult Tobacco Survey: Qatar Country Report 2013. 2013.
11. WHO. Global Adult Tobacco Survey: Pakistan Country Report 2014. 2014.
12. Jawad M, Lee JT, Millett C. Waterpipe Tobacco Smoking Prevalence and Correlates in 25 Eastern Mediterranean and Eastern European Countries: Cross-Sectional Analysis of the Global Youth Tobacco Survey. *Nicotine Tob Res.* 2016;18(4):395-402.
13. Salloum RG, Lee J, Mostafa A, Abu-Rmeileh NME, Hamadeh RR, Darawad MW, et al. Waterpipe Tobacco Smoking among University Students in Three Eastern Mediterranean Countries: Patterns, Place, and Price. *Subst Use Misuse.* 2019;54(14):2275-83.
14. Hamadeh RR, Lee J, Abu-Rmeileh NME, Darawad M, Mostafa A, Kheirallah KA, et al. Gender differences in waterpipe tobacco smoking among university students in four Eastern Mediterranean countries. *Tob Induc Dis.* 2020;18:100.
15. Merrill RM, Madanat H, Kelley AT. Smoking prevalence, attitudes, and perceived smoking prevention and control responsibilities and practices among nurses in Amman, Jordan. *Int J Nurs Pract.* 2010;16(6):624-32.
16. Sibai A, Tohme R, Mahfoud Z, Chaaya M, Hwalla N. Non-communicable diseases and behavioral risk factor survey: comparison of estimates based on cell phone interviews with face to face interviews. WHO Lebanon office Beirut, Lebanon: Final report submitted to World Health Organization-Lebanon office. 2009.
17. MoH. Jordan National Stepwise (STEPS) Survey for Non-communicable Disease Risk Factors. Jordan 2019

18. Palestinian Bureau of Statistics. Palestinian Family Survey 2010. Monitoring the Situation of Children and Women. UNICEF, UNFPA. 2013.
19. Abdulrahim S, Jawad M. Socioeconomic differences in smoking in Jordan, Lebanon, Syria, and Palestine: A cross-sectional analysis of national surveys. *PLoS One*. 2018;13(1):e0189829.
20. Daou KN, Bou-Orm IR, Adib SM. Factors associated with waterpipe tobacco smoking among Lebanese women. *Women Health*. 2018;58(10):1124-34.
21. Jaghbir M, Shareif, S. & Ahram, M. Quitting smoking and utilization of smoking cessation services in Jordan: a population-based survey. *EMHJ-Eastern Mediterranean Health Journal*, 20 (9): 538 - 546. 2014.
22. Khattab A, Javaid A, Iraqi G, Alzaabi A, Ben Kheder A, Koniski ML, et al. Smoking habits in the Middle East and North Africa: results of the BREATHE study. *Respir Med*. 2012;106 Suppl 2:S16-24.
23. Hamadeh RR, Borgan SM, Khabisa J, Sibai AM. Tobacco Research in the Eastern Mediterranean Region: A Scoping Review of Published Studies from Seven Countries. *Journal of Community Health*. 2021;46(1):225-31.
24. Ebrahimi Kalan M, Abazari M, Ben Taleb Z, Adham D, Abbasi A, Bursac Z, et al. Characteristics of flavored and non-flavored waterpipe tobacco users: a real-world setting study. *Environ Sci Pollut Res Int*. 2021;28(41):57629-39.
25. Yang Y, Lindblom E, Salloum R, Ward K. The impact of a comprehensive tobacco product flavor ban in San Francisco among young adults. *Addict Behav Rep*. 2020;11:100273-.
26. Aghar H, El-Khoury N, Reda M, Hamadeh W, Krayem H, Mansour M, et al. Knowledge and attitudes towards E-cigarette use in Lebanon and their associated factors. *BMC Public Health*. 2020;20:1-18.
27. Nakkash RT, El Boukhari N, Afifi RA. 'When I smoked it, it was like a slap in the face but it felt really good': exploring determinants of midwakh use among young adults in Lebanon. *Tobacco Control*. 2021;30(3):351-5.
28. Afifi R, Saravanan M, El Salibi N, Nakkash R, Rady A, Sherman S, et al. Evidence from the Lebanon Global School-based Student Health Survey on midwakh tobacco smoking in school students: a harbinger of the next global tobacco pandemic? *Eastern Mediterranean Health Journal*. 2020;26(1):116-21.
29. Salloum RG, Asfar T, Maziak W. Toward a Regulatory Framework for the Waterpipe. *Am J Public Health*. 2016;106(10):1773-7.
30. Chalak A, Nakkash R, Abu-Rmeileh N, Khader Y, Jawad M, Mostafa A, et al. Own-price and cross-price elasticities of demand for cigarettes and waterpipe tobacco in three Eastern Mediterranean countries: a volumetric choice experiment. *Tobacco Control*. 2021:tobaccocontrol-2021-056616.
31. Jawad M, Jawad S, Waziry RK, Ballout RA, Akl EA. Interventions for waterpipe tobacco smoking prevention and cessation: a systematic review. *Scientific Reports*. 2016;6(1):25872.
32. Nakkash R, Tleis M, Chehab S, Wensong W, Schmidt M, Ward KD, et al. Novel Insights into Young Adults' Perceived Effectiveness of Waterpipe Tobacco-Specific Pictorial Health Warning Labels in Lebanon: Implications for Tobacco Control Policy. *International Journal of Environmental Research and Public Health*. 2021;18(13):7189.
33. Obeidat NA, Al-Hadid M, Hatoqai AA, Shihab RA, Hawari FI. Reclaiming the value of pictorial health warning labels in Jordan. *Tobacco control*. 2018;27(5):589-91.

1  
2  
3  
4  
5  
6  
7  
8  
9  
10  
11  
12  
13  
14  
15  
16  
17  
18  
19  
20  
21  
22  
23  
24  
25  
26  
27  
28  
29  
30  
31  
32  
33  
34  
35  
36  
37  
38  
39  
40  
41  
42  
43  
44  
45  
46  
47  
48  
49  
50  
51  
52  
53  
54  
55  
56  
57  
58  
59  
60

For peer review only

## HOUSEHOLD QUESTIONNAIRE

*Survey on the Economics of Waterpipe Smoking in Lebanon*

| HOUSEHOLD INFORMATION PANEL                                                         |                                                                                                                                                                                                             |
|-------------------------------------------------------------------------------------|-------------------------------------------------------------------------------------------------------------------------------------------------------------------------------------------------------------|
| <b>HH1.</b> Cluster number:                    ___ ___ ___                          | <b>HH2.</b> Household number:                    ___ ___                                                                                                                                                    |
| <b>HH3.</b> Interviewer's name:<br>Name _____<br>ID number: ___ ___                 | <b>HH4.</b> Supervisor's name:<br>Name _____                                                                                                                                                                |
| <b>HH5.</b> Day / Month / Year of interview:<br>___ ___ / ___ ___ / ___ ___ ___ ___ | <b>HH6B. Governorate:</b><br>BEIRUT: .....[]1<br>MOUNT LEBANON: .....[]2<br>NORTH: .....[]3<br>AKKAR: .....[]4<br>BEKAA: .....[]5<br>SOUTH: .....[]6<br>EL NABATIEH: .....[]7<br>BAALBEK-EL HERMEL:.....[]8 |
| <b>HH6A.</b> LOCALITY NAME: _____                                                   |                                                                                                                                                                                                             |
| <b>HH7.</b> Respondent number: ___ ___ ___                                          |                                                                                                                                                                                                             |

1  
2  
3  
4  
5  
6  
7  
8  
9  
10  
11  
12  
13  
14  
15  
16  
17  
18  
19  
20  
21  
22  
23  
24  
25  
26  
27  
28  
29  
30  
31  
32  
33  
34  
35  
36  
37  
38  
39  
40  
41  
42  
43  
44  
45  
46  
47  
48  
49  
50  
51  
52  
53  
54  
55  
56  
57  
58  
59  
60

| <b>SECTION A: BACKGROUND CHARACTERISTICS</b>                      |                                                                                                                                                                                                                                                                                                                                                                                                                                                                                                                                                                                                                                                                           |
|-------------------------------------------------------------------|---------------------------------------------------------------------------------------------------------------------------------------------------------------------------------------------------------------------------------------------------------------------------------------------------------------------------------------------------------------------------------------------------------------------------------------------------------------------------------------------------------------------------------------------------------------------------------------------------------------------------------------------------------------------------|
| <b>A1.</b> Gender                                                 | <p><i>Interviewer: State gender at sight.</i></p> <p>Male.....<input type="checkbox"/> 1</p> <p>Female.....<input type="checkbox"/> 2</p>                                                                                                                                                                                                                                                                                                                                                                                                                                                                                                                                 |
| <b>A2.</b> What is your age?                                      | <p>___ ___ ___ Years</p> <p><i>If the respondent is not sure, the respondent will estimate the age</i></p> <p><i>Interviewer: round to the nearest integer if necessary.</i></p>                                                                                                                                                                                                                                                                                                                                                                                                                                                                                          |
| <b>A3.</b> What is your marital status?                           | <p>Single.....<input type="checkbox"/> 1</p> <p>Engaged.....<input type="checkbox"/> 2</p> <p>Married.....<input type="checkbox"/> 3</p> <p>Separated.....<input type="checkbox"/> 4</p> <p>Divorced.....<input type="checkbox"/> 5</p> <p>Widow(er).....<input type="checkbox"/> 6</p> <p>No response.....<input type="checkbox"/> 777</p>                                                                                                                                                                                                                                                                                                                               |
| <b>A4.</b> What is the highest education level you have obtained? | <p><i>Interviewer: participant can choose one item only:</i></p> <p>No formal education.....<input type="checkbox"/> 1</p> <p>Completed primary school.....<input type="checkbox"/> 2</p> <p>Completed middle school.....<input type="checkbox"/> 3</p> <p>Completed high school/equivalent education.....<input type="checkbox"/> 4</p> <p>Completed 1-2-year post-secondary/vocational.....<input type="checkbox"/> 5</p> <p>Completed university/college.....<input type="checkbox"/> 6</p> <p>Completed postgraduate degree.....<input type="checkbox"/> 7</p> <p>Don't know.....<input type="checkbox"/> 999</p> <p>No response.....<input type="checkbox"/> 777</p> |

|                                                                                                                                                                                                                                                                                                                                                                                                    |                                                                                                                                                                                                                                                                                                                                                                                                                                                                                                            |
|----------------------------------------------------------------------------------------------------------------------------------------------------------------------------------------------------------------------------------------------------------------------------------------------------------------------------------------------------------------------------------------------------|------------------------------------------------------------------------------------------------------------------------------------------------------------------------------------------------------------------------------------------------------------------------------------------------------------------------------------------------------------------------------------------------------------------------------------------------------------------------------------------------------------|
| <p>1<br/>2<br/>3<br/>4<br/>5<br/>6<br/>7<br/>8<br/>9<br/>10<br/>11<br/>12</p> <p><b>A5.</b> What is your nationality?</p>                                                                                                                                                                                                                                                                          | <p><i>Interviewer: participant can choose more than one nationality</i></p> <p>Lebanese .....[] 1</p> <p>Syrian .....[]2</p> <p>Palestinian .....,.....[]3</p> <p>Other: _____ ,,,. []4</p>                                                                                                                                                                                                                                                                                                                |
| <p>13<br/>14<br/>15<br/>16<br/>17<br/>18<br/>19<br/>20<br/>21<br/>22<br/>23<br/>24<br/>25<br/>26<br/>27<br/>28<br/>29<br/>30<br/>31<br/>32<br/>33<br/>34<br/>35<br/>36<br/>37</p> <p><b>A6.</b> Which of the following best describe your employment status?</p>                                                                                                                                   | <p><i>Interviewer: Participant can choose all that apply</i></p> <p>Full-time employed in the workforce (including self-employed).....[] 1</p> <p>Part-time employed in the workforce (including self-employed).....[] 2</p> <p>Unemployed.....[] 3</p> <p>Retired or on a pension.....[] 4</p> <p>Full-time student.....[] 5</p> <p>Part-time student.....[] 6</p> <p>Housewife/ Home duties.....[] 7</p> <p>Other (specify)_____.....[] 8</p> <p>Don't know.....[] 999</p> <p>No response.....[] 777</p> |
| <p>38<br/>39<br/>40<br/>41<br/>42<br/>43<br/>44<br/>45<br/>46<br/>47<br/>48<br/>49<br/>50<br/>51</p> <p><b>A7.</b> What is the best estimate of your <b><u>monthly household income</u></b>, that is, total income before taxes, or gross income, of all persons in your household combined. We ask this for statistical purposes. We assure your responses will remain strictly confidential.</p> | <p>Less than 800,000 L.L .....[] 1</p> <p>From 800,000 L.L to less than 1,500,000 L.L....[] 2</p> <p>From 1,500,000L.L to less than 3,000,000L.L ..[] 3</p> <p>3,000,000 L.L and more.....[] 4</p> <p>Don't know.....[] 999</p> <p>No response.....[] 777</p>                                                                                                                                                                                                                                              |
| <p>52<br/>53<br/>54<br/>55<br/>56<br/>57<br/>58<br/>59<br/>60</p> <p><b>A8.</b> What is the best estimate of your <b><u>monthly individual income</u></b>, that is, your total income before taxes, or gross income. We ask this for statistical purposes. We assure your responses will remain strictly confidential.</p>                                                                         | <p>Less than 800,000 L.L .....[] 1</p> <p>From 800,000 L.L to less than 1,500,000 L.L....[] 2</p> <p>From 1,500,000L.L to less than 3,000,000L.L ..[] 3</p> <p>3,000,000 L.L and more.....[] 4</p> <p>No income .....[]5</p> <p>Don't know.....[] 999</p>                                                                                                                                                                                                                                                  |

|                                                                                                                                                                             |                                                                                                                                                                                                                                                       |
|-----------------------------------------------------------------------------------------------------------------------------------------------------------------------------|-------------------------------------------------------------------------------------------------------------------------------------------------------------------------------------------------------------------------------------------------------|
|                                                                                                                                                                             | No response.....[] 777                                                                                                                                                                                                                                |
| <b>A9.</b> In the last month, did you or anyone else in the household had to borrow money to pay any important bills on time, such as electricity, telephone or rent bills? | Yes.....[] 1<br>No.....[] 2<br>Don't know.....[] 999<br>No response.....[] 777                                                                                                                                                                        |
| <b>A10.</b> Who usually makes the decisions regarding the daily household purchases?<br>Daily household purchases include grocery or daily essentials etc..                 | Nobody .....[]1<br>Respondent alone .....[]2<br>Respondent and spouse/partner .....[]3<br>Respondent and other person .....[]4<br>Spouse /partner alone .....[]5<br>Someone else. Specify:_____[]6<br>Don't know.....[] 999<br>No response.....[] 777 |
| <b>A11.</b> Who usually makes the decisions regarding the large household purchases?<br>Large household purchases include furniture or a car etc...                         | Nobody .....[]1<br>Respondent alone .....[]2<br>Respondent and spouse/partner .....[]3<br>Respondent and other person .....[]4<br>Spouse/partner alone .....[]5<br>Someone else. Specify:_____[]6<br>Don't know.....[] 999<br>No response.....[] 777  |



**SECTION B: TOBACCO SMOKING**

**Tobacco Products**

**B1.** Do you currently use any tobacco products (cigarettes, arguileh, other tobacco products)?

Yes .....[]1

No .....[]2

**If answer is “no”, skip question B2-B35**

**B2.** On average, how many of the following products do you **currently** smoke each (day/week/month)? (One option)

*Interviewer: if respondent reports smoking the product but not every (day/week/month), enter 888*

**Regular Cigarettes?**

\_\_\_ \_\_\_ \_\_\_ per day

\_\_\_ \_\_\_ \_\_\_ per week

\_\_\_ \_\_\_ \_\_\_ per month

**Number of arguileh sessions at home or someone else’s home?**

\_\_\_ \_\_\_ \_\_\_ per day

\_\_\_ \_\_\_ \_\_\_ per week

\_\_\_ \_\_\_ \_\_\_ per month

**Number of arguileh sessions in a café or restaurant?**

\_\_\_ \_\_\_ \_\_\_ per day

\_\_\_ \_\_\_ \_\_\_ per week

\_\_\_ \_\_\_ \_\_\_ per month

**Do you smoke any other tobacco products?**

Yes .....[]1

No .....[]2

If yes, specify:

|                 | <b>Every day</b> | <b>Some days</b> | <b>Not at all</b> |
|-----------------|------------------|------------------|-------------------|
| E-cigarettes    |                  |                  |                   |
| Cigars          |                  |                  |                   |
| Chewing Tobacco |                  |                  |                   |

|                                                                                                       | <table border="1"> <tr> <td>Midwakh/ Dokha</td> <td></td> <td></td> <td></td> </tr> <tr> <td>Roll your own cigarettes</td> <td></td> <td></td> <td></td> </tr> <tr> <td>Other. Specify<br/>_____</td> <td></td> <td></td> <td></td> </tr> </table>                                                                                                                                               | Midwakh/ Dokha      |                    |                     |                    | Roll your own cigarettes |             |  |  | Other. Specify<br>_____           |                                                 |  |  |
|-------------------------------------------------------------------------------------------------------|--------------------------------------------------------------------------------------------------------------------------------------------------------------------------------------------------------------------------------------------------------------------------------------------------------------------------------------------------------------------------------------------------|---------------------|--------------------|---------------------|--------------------|--------------------------|-------------|--|--|-----------------------------------|-------------------------------------------------|--|--|
| Midwakh/ Dokha                                                                                        |                                                                                                                                                                                                                                                                                                                                                                                                  |                     |                    |                     |                    |                          |             |  |  |                                   |                                                 |  |  |
| Roll your own cigarettes                                                                              |                                                                                                                                                                                                                                                                                                                                                                                                  |                     |                    |                     |                    |                          |             |  |  |                                   |                                                 |  |  |
| Other. Specify<br>_____                                                                               |                                                                                                                                                                                                                                                                                                                                                                                                  |                     |                    |                     |                    |                          |             |  |  |                                   |                                                 |  |  |
| <b>B3.</b> Are you aware of an increase in the price of tobacco products recently?                    | Yes ..... <input type="checkbox"/> 1<br>No ..... <input type="checkbox"/> 2<br>Specify:<br>Cigarettes<br>Waterpipe tobacco<br>Both                                                                                                                                                                                                                                                               |                     |                    |                     |                    |                          |             |  |  |                                   |                                                 |  |  |
| <b>B4.</b> If yes, please report the before and after price of the products that you usually purchase | <table border="1"> <thead> <tr> <th><i>Product</i></th> <th><i>Unit</i></th> <th><i>Price Before</i></th> <th><i>Price After</i></th> </tr> </thead> <tbody> <tr> <td><i>Cigarettes</i></td> <td><i>Pack</i></td> <td></td> <td></td> </tr> <tr> <td><i>Waterpipe tobacco products</i></td> <td><i>Select unit: 50 g, 100g, 250g, 500g, 1kg</i></td> <td></td> <td></td> </tr> </tbody> </table> | <i>Product</i>      | <i>Unit</i>        | <i>Price Before</i> | <i>Price After</i> | <i>Cigarettes</i>        | <i>Pack</i> |  |  | <i>Waterpipe tobacco products</i> | <i>Select unit: 50 g, 100g, 250g, 500g, 1kg</i> |  |  |
| <i>Product</i>                                                                                        | <i>Unit</i>                                                                                                                                                                                                                                                                                                                                                                                      | <i>Price Before</i> | <i>Price After</i> |                     |                    |                          |             |  |  |                                   |                                                 |  |  |
| <i>Cigarettes</i>                                                                                     | <i>Pack</i>                                                                                                                                                                                                                                                                                                                                                                                      |                     |                    |                     |                    |                          |             |  |  |                                   |                                                 |  |  |
| <i>Waterpipe tobacco products</i>                                                                     | <i>Select unit: 50 g, 100g, 250g, 500g, 1kg</i>                                                                                                                                                                                                                                                                                                                                                  |                     |                    |                     |                    |                          |             |  |  |                                   |                                                 |  |  |
| <b>B5.</b> Did the price change affect your purchase patterns?                                        | Yes ..... <input type="checkbox"/> 1<br>No ..... <input type="checkbox"/> 2                                                                                                                                                                                                                                                                                                                      |                     |                    |                     |                    |                          |             |  |  |                                   |                                                 |  |  |
| <b>B6.</b> If yes, did it:                                                                            | Increase your purchase patterns ..... <input type="checkbox"/> 1<br>Decrease your purchase patterns ..... <input type="checkbox"/> 2                                                                                                                                                                                                                                                             |                     |                    |                     |                    |                          |             |  |  |                                   |                                                 |  |  |
| <b>Regular Cigarettes</b>                                                                             |                                                                                                                                                                                                                                                                                                                                                                                                  |                     |                    |                     |                    |                          |             |  |  |                                   |                                                 |  |  |
| <b>B7.</b> Have you smoked at least 100 cigarettes in your entire life?                               | Yes ..... <input type="checkbox"/> 1<br>No..... <input type="checkbox"/> 2<br>Don't know ..... <input type="checkbox"/> 999<br>No response ..... <input type="checkbox"/> 777<br><b>If answer is "no", skip question B4.</b>                                                                                                                                                                     |                     |                    |                     |                    |                          |             |  |  |                                   |                                                 |  |  |

|                                                                                                                             |                                                                                                                                                                                                                                                                                                                                                                                                              |
|-----------------------------------------------------------------------------------------------------------------------------|--------------------------------------------------------------------------------------------------------------------------------------------------------------------------------------------------------------------------------------------------------------------------------------------------------------------------------------------------------------------------------------------------------------|
| <p><b>B8.</b> Do you <u>now</u> smoke cigarettes?</p>                                                                       | <p>Every day..... <input type="checkbox"/> 1<br/> Some days ..... <input type="checkbox"/> 2<br/> Not at all ..... <input type="checkbox"/> 3<br/> Don't know ..... <input type="checkbox"/> 999<br/> No response ..... <input type="checkbox"/> 777<br/> <b>If the answer is “every day” or “somedays”, skip question B5.</b></p>                                                                           |
| <p><b>B9.</b> Do you think you might smoke cigarettes, even once, over the next year?</p>                                   | <p>Definitely yes ..... <input type="checkbox"/>1<br/> Probably yes ..... <input type="checkbox"/>2<br/> Probably no ..... <input type="checkbox"/>3<br/> Definitely no ..... <input type="checkbox"/>4<br/> <b>If answer is “probably no” or definitely no”, skip questions B6 – B10</b></p>                                                                                                                |
| <p><b>B10.</b> The last time you bought cigarettes for yourself, how many cigarette packs did you buy?</p>                  | <p><i>Interviewer: record number /check unit</i><br/> ____ _<br/> Packs..... <input type="checkbox"/> 2<br/> Carton..... <input type="checkbox"/> 3<br/> Other (specify): _____..... <input type="checkbox"/> 4<br/> Never bought cigarettes ..... <input type="checkbox"/> 5<br/> If answer is “never bought cigarettes”, skip questions B7-B10</p>                                                         |
| <p><b>B11.</b> In total, how much money did you pay for the last purchase?</p>                                              | <p><i>Interviewer: if participant doesn't know, enter 999</i><br/> ____ _ L.L.</p>                                                                                                                                                                                                                                                                                                                           |
| <p><b>B12.</b> What was the cigarette pack brand name?</p>                                                                  | <p><i>Interviewer: record brand name</i><br/> _____</p>                                                                                                                                                                                                                                                                                                                                                      |
| <p><b>B13.</b> Which of the following statements best describes your thinking about giving up <u>cigarette</u> smoking?</p> | <p>In the next 30 days ..... <input type="checkbox"/>1<br/> In the next 6 months ..... <input type="checkbox"/>2<br/> In the next year ..... <input type="checkbox"/>3<br/> More than one year from now ..... <input type="checkbox"/>4<br/> I don't want to quit ..... <input type="checkbox"/>5<br/> Don't know ..... <input type="checkbox"/> 999<br/> No response ..... <input type="checkbox"/> 777</p> |

|                                                                                                                                                                               |                                                                                                                                                                                                                                                                            |
|-------------------------------------------------------------------------------------------------------------------------------------------------------------------------------|----------------------------------------------------------------------------------------------------------------------------------------------------------------------------------------------------------------------------------------------------------------------------|
| <p><b>B14.</b> In the past 12 months, have you stopped smoking cigarettes for one day or longer because you were trying to quit?</p>                                          | <p>Yes .....[]1<br/>                 No .....[]2<br/>                 Don't know .....[] 999<br/>                 No response .....[] 777</p>                                                                                                                              |
| <p><b>Arguileh</b></p>                                                                                                                                                        |                                                                                                                                                                                                                                                                            |
| <p><b>B15.</b> Have you <u>ever</u> smoked tobacco in a arguileh even just a few puffs?</p>                                                                                   | <p>Yes .....[] 1<br/>                 No.....[] 2<br/>                 Don't know .....[] 999<br/>                 No response .....[] 777<br/> <b>If answer is “no”, skip question B12</b></p>                                                                            |
| <p><b>B16.</b> Do you <u>now</u> smoke tobacco in a waterpipe?</p>                                                                                                            | <p>Every day.....[] 1<br/>                 Some days .....[] 2<br/>                 Not at all .....[] 3<br/>                 Don't know .....[] 999<br/>                 No response .....[] 777<br/> <b>If answer is “everyday” or “somedays” skip question B13.</b></p> |
| <p><b>B17.</b> Do you think you might smoke waterpipe, even once, over the next year?</p>                                                                                     | <p>Definitely yes ..... []1<br/>                 Probably yes .....[]2<br/>                 Probably not .....[]3<br/>                 Definitely not .....[]4<br/> <b>If answer is “probably not” or “definitely not”, skip questions B14 - B35</b></p>                   |
| <p><b>B18.</b> What flavor do you mostly prefer smoking?</p>                                                                                                                  | <p>Non-flavored .....[]1<br/>                 Flavored. Insert flavor: _____ ....[]2</p>                                                                                                                                                                                   |
| <p><b>B19.</b> The last time you smoked arguileh at a café/restaurant, how many arguileh smoking heads/rocks did you have and how much did you pay for these heads/rocks?</p> | <p><i>Interviewer: record number and prices</i><br/>                 Number: ___ ___ ___<br/>                 Price: ___ ___ ___<br/> <b>If quantity is zero “0”, skip questions B16- B22</b></p>                                                                          |

|                                                                                                                                                                                                              |                                                                                                                                                                                                                                                  |
|--------------------------------------------------------------------------------------------------------------------------------------------------------------------------------------------------------------|--------------------------------------------------------------------------------------------------------------------------------------------------------------------------------------------------------------------------------------------------|
| <p><b>B20.</b> The last time you smoked arguileh at a café/restaurant, how much did you pay?</p>                                                                                                             | <p><i>Interviewer: if participant doesn't know, enter 999</i></p> <p>Record Price:<br/>         ____ ____ ____ L.L.</p>                                                                                                                          |
| <p><b>B21.</b> How many heads/rocks did they offer you for free?</p>                                                                                                                                         | <p><i>Interviewer: Record number</i></p> <p>____ ____ ____</p> <p><i>Don't know .....[] 999</i></p> <p><i>No response .....[] 777</i></p>                                                                                                        |
| <p><b>B22.</b> Think of the last time you smoked arguileh at a café. Which of the following best describes the type of establishment?</p>                                                                    | <p>Café .....[]1</p> <p>Baladi/ Sha'bi Café .....[]2</p> <p>Internet café.....[]3</p> <p>Restaurant .....[]4</p> <p>Other _____ .....[]5</p>                                                                                                     |
| <p><b>B23.</b> Does the establishment typically serve women?</p>                                                                                                                                             | <p>Yes.....[] 1</p> <p>No .....[] 2</p> <p>Don't know .....[] 999</p> <p>No response .....[] 777</p>                                                                                                                                             |
| <p><b>B24.</b> Approximately one year ago, how many arguileh smoking heads/rocks did you smoke during a typical arguileh cafe visit each month and how much did you pay for these heads/rocks per month?</p> | <p><i>Interviewer: record number and prices if participant doesn't know the price, put 999</i></p> <p>Number: ____ ____ ____ per month</p> <p>Price: : ____ ____ ____ per month</p> <p>Don't know .....[] 999</p> <p>No response .....[] 777</p> |
| <p><b>B25.</b> Approximately one year ago, how much did you pay at a typical arguileh café visit each month?</p>                                                                                             | <p><i>Interviewer: Record price</i></p> <p>____ ____ ____ L.L. per month</p> <p>Don't know .....[] 999</p> <p>No response .....[] 777</p>                                                                                                        |
| <p><b>B26.</b> How many heads did they offer you for free?</p>                                                                                                                                               | <p><i>Interviewer: Record number</i></p> <p>____ ____ ____</p> <p><i>Don't know .....[] 999</i></p> <p><i>No response .....[] 777</i></p>                                                                                                        |

|                                                                                                                                       |                                                                                                                                                                                                                                                                                                                                                                                                                                                                                                                                               |
|---------------------------------------------------------------------------------------------------------------------------------------|-----------------------------------------------------------------------------------------------------------------------------------------------------------------------------------------------------------------------------------------------------------------------------------------------------------------------------------------------------------------------------------------------------------------------------------------------------------------------------------------------------------------------------------------------|
| <p><b>B27.</b> The last time you bought arguileh tobacco pack for yourself from the store, how much arguileh tobacco did you buy?</p> | <p><i>Interviewer: record number and check unit</i></p> <p>___ ___ ___ 50 gram packs.....[] 1</p> <p>___ ___ ___ 100 gram packs.....[] 2</p> <p>___ ___ ___ 250 gram packs.....[] 3</p> <p>___ ___ ___ 500 gram packs.....[] 4</p> <p>___ ___ ___ 1 kilogram packs.....[] 5</p> <p>___ ___ ___ Other pack - specify weight: __.[] 6</p> <p>___ ___ ___ Bulk - specify weight: ____...[] 7</p> <p>Never bought arguileh tobacco from store ....[]8</p> <p><b>If the answer is “Never bought arguileh tobacco” skip questions B24 – B27</b></p> |
| <p><b>B28.</b> In total, how much did you pay for the purchase of arguileh tobacco from the store?</p>                                | <p><i>Interviewer: if participant doesn't know, enter 999</i></p> <p>___ ___ ___ L.L.</p>                                                                                                                                                                                                                                                                                                                                                                                                                                                     |
| <p><b>B29.</b> What was the arguileh tobacco brand name?</p>                                                                          | <p><i>Interviewer: record brand name</i></p> <p>_____</p>                                                                                                                                                                                                                                                                                                                                                                                                                                                                                     |
| <p><b>B30.</b> Approximately one year ago, how much arguileh tobacco did you buy from the store each month?</p>                       | <p><i>Interviewer: record number and check unit</i></p> <p>___ ___ ___ 50 gram packs.....[] 1</p> <p>___ ___ ___ 100 gram packs.....[] 2</p> <p>___ ___ ___ 250 gram packs.....[] 3</p> <p>___ ___ ___ 500 gram packs.....[] 4</p> <p>___ ___ ___ 1 kilogram packs.....[] 5</p> <p>___ ___ ___ Other pack - specify weight: __.[] 6</p> <p>___ ___ ___ Bulk - specify weight: ____...[] 7</p> <p>Never bought arguileh tobacco.....[] 8</p> <p>Don't know .....[] 999</p> <p>No response .....[] 777</p>                                      |

|                                                                                                                                                                                                          |                                                                                                                                                                                                                                                                                                                                                                                                                                                                            |
|----------------------------------------------------------------------------------------------------------------------------------------------------------------------------------------------------------|----------------------------------------------------------------------------------------------------------------------------------------------------------------------------------------------------------------------------------------------------------------------------------------------------------------------------------------------------------------------------------------------------------------------------------------------------------------------------|
| <p><b>B31.</b> Approximately one year ago, how much did you spend on arguileh tobacco purchases from stores each month ?</p>                                                                             | <p><i>Interviewer: if participant doesn't know, enter 999</i></p> <p>____ _ L.L. per month</p> <p>Don't know .....[] 999</p> <p>No response .....[] 777</p>                                                                                                                                                                                                                                                                                                                |
| <p><b>B32.</b> The last time you used arguileh delivery service, how many arguileh smoking heads/rocks did you buy and how much did you pay for these heads/rocks?</p>                                   | <p><i>Interviewer: record number and prices, if participant doesn't know, enter 999</i></p> <p>Number: ____ _</p> <p>Price: ____ _</p> <p><b>if the quantity is zero "0", skip questions B29–B33</b></p>                                                                                                                                                                                                                                                                   |
| <p><b>B33.</b> The last time you used arguileh delivery service, how much did you pay?</p>                                                                                                               | <p><i>Interviewer: if participant doesn't know, enter 999</i></p> <p><i>Insert price:</i></p> <p>_____ L.L.</p>                                                                                                                                                                                                                                                                                                                                                            |
| <p><b>B34.</b> How many heads did they offer you for free?</p>                                                                                                                                           | <p><i>Interviewer: Record number</i></p> <p>_____</p> <p>Don't know .....[] 999</p> <p>No response .....[] 777</p>                                                                                                                                                                                                                                                                                                                                                         |
| <p><b>B35.</b> Approximately one year ago, how many arguileh smoking heads/rocks did you order using arguileh delivery services each month and how much did you pay for these heads/rocks per month?</p> | <p><i>Interviewer: In case the participant expressed difficulty, ask him how many arguileh's does he order per month and typically how many heads come with the arguileh and then multiply them. For example, if on average you smoke 20 arguileh's per month and it comes with 2 heads, then your total is 20x2=40.</i></p> <p><i>Record number and prices, if participant doesn't know, enter 999</i></p> <p>Number: ____ _ per month</p> <p>Price: ____ _ per month</p> |

|                                                                                                                                   |                                                                                                                                                                                                                           |
|-----------------------------------------------------------------------------------------------------------------------------------|---------------------------------------------------------------------------------------------------------------------------------------------------------------------------------------------------------------------------|
|                                                                                                                                   | Don't know .....[] 999<br>No response .....[] 777                                                                                                                                                                         |
| <b>B36.</b> Appro<br>ximately one year ago, how much did you<br>pay?                                                              | <i>Interviewer: Record price. If participant doesn't<br/>know, put 999.</i><br>____ _ L.L. per month<br>Don't know .....[] 999<br>No response .....[] 777                                                                 |
| <b>B37.</b> How many heads did they offer you for<br>free?                                                                        | <i>Interviewer: record number</i><br>____ _<br><i>Don't know .....[] 999</i><br><i>No response .....[] 777</i>                                                                                                            |
| <b>B38.</b> Which of the following statements best<br>describes your thinking about giving up<br><u>arguileh</u> smoking?         | In the next 30 days ..... []1<br>In the next 6 months .....[]2<br>In the next year .....[]3<br>More than one year from now .....[]4<br>I don't want to quit .....[]5<br>Don't know .....[] 999<br>No response .....[] 777 |
| <b>B39.</b> In the past 12 months, have you stopped<br>smoking arguileh for one day or longer<br>because you were trying to quit? | Yes .....[]1<br>No .....[]2<br>Don't know .....[] 999<br>No response .....[] 777                                                                                                                                          |
| <b>B40.</b> In your opinion, is it acceptable for<br>females to smoke waterpipe in general?                                       | Yes .....[]1<br>No .....[]2<br>Don't know .....[] 999<br>No response .....[] 777                                                                                                                                          |

Would you consider purchasing any tobacco products (cigarettes, arguileh tobacco, arguileh delivery, arguileh at a café,) at any time in the future?

Yes .....[]1

No.....[]2

If the answer is “No” the interviewer should skip the DCE scenarios.



1  
2  
3  
4  
5  
6  
7  
8  
9  
10  
11  
12  
13  
14  
15  
16  
17  
18  
19  
20  
21  
22  
23  
24  
25  
26  
27  
28  
29  
30  
31  
32  
33  
34  
35  
36  
37  
38  
39  
40  
41  
42  
43  
44  
45  
46  
47  
48  
49  
50  
51  
52  
53  
54  
55  
56  
57  
58  
59  
60

For peer review only

## SECTION C: DISCRETE CHOICE EXPERIMENT

### *Description:*

- In the next section, you will see 8 hypothetical choice scenarios about buying tobacco for yourself, the only difference between the scenarios is the price of the tobacco products
- Each scenario will present you with 8 different tobacco products that you may purchase:
  1. Premium cigarettes like Marlboro, Davidoff, and Gitanes
  2. Discount cigarettes like Byblos, Cedars, and Maestro
  3. Premium mouassal arguileh tobacco (250 g) like Al Fakher, Nakhla, and Mazaya
  4. Discount mouassal arguileh tobacco (250 g) like Ya layl, Al Tamayoz
  5. Ajami arguileh tobacco (250 g) like Al Zaeem, Al Bacha, and Tombac Asfahani

6. Home-delivery of prepared arguileh
7. Baladi/sha'bi arguileh cafes
8. Fancy arguileh cafes

- Each of the 8 product categories will have its own price, and the prices change in each scenario.
- You will be asked to imagine yourself buying your needs of arguileh and cigarette smoking products as you would typically in real life, and tell us how many items you would buy.
- You may choose to buy 1 or more items from some types and none (i.e. 0) from others. You may choose to buy nothing at all, in which case the answer will be 0 for all 8 tobacco products.
- Please seriously consider the prices at which each item is being offered when making your decision about the quantities. Make sure that the sum you spend on these products is in line with your budget for buying tobacco. Also, keep in mind that the money you spend on tobacco products will not be available for you to spend on other things.
- Here is an example of a choice scenario:

. Think about the amount of arguileh and cigarette products you would purchase, based on the following prices:

|          | Cigarettes premium | Cigarettes discount | Arguileh tobacco premium | Arguileh tobacco discount | Ajami      | Arguileh home delivery | Arguileh at fancy cafe | Arguileh session at Sha'bi cafe |
|----------|--------------------|---------------------|--------------------------|---------------------------|------------|------------------------|------------------------|---------------------------------|
|          | Pack of 20         | Pack of 20          | 250g pack                | 250g pack                 | 250g pack  | 1 waterpipe            | 1 waterpipe            | 1 waterpipe                     |
| Price    | 5,000 L.L          | 1,250 L.L           | 13,500 L.L               | 10,250 L.L                | 20,000 L.L | 7,500 L.L              | 15,000 L.L             | 7,500 L.L                       |
| Quantity | <i>1</i>           | <i>0</i>            | <i>2</i>                 | <i>0</i>                  | <i>0</i>   | <i>0</i>               | <i>1</i>               | <i>2</i>                        |

Now I leave you to complete the choice scenarios. [INTERVIEWER: LEAVE THE PARTICIPANT TO FILL IN THE CHOICE SETS]

VERSION 1

C1. Think about the amount of arguileh and cigarette products you would purchase, based on the following prices:

|          | Cigarettes premium | Cigarettes discount | Arguileh tobacco premium | Arguileh tobacco discount | Tombac Ajami | Arguileh home delivery | Arguileh café session premium | Arguileh café session at Sha'bi café |
|----------|--------------------|---------------------|--------------------------|---------------------------|--------------|------------------------|-------------------------------|--------------------------------------|
|          | Pack of 20         | Pack of 20          | 250g pack                | 250g pack                 | 250g pack    | 1 waterpipe            | 1 waterpipe                   | 1 waterpipe                          |
| Price    | 2, 500 L.L         | 750 L.L             | 13, 500 L.L              | 10, 250 L.L               | 20, 000 L.L  | 7, 500 L.L             | 15, 000 L.L                   | 7, 500 LL                            |
| Quantity |                    |                     |                          |                           |              |                        |                               |                                      |

C2. Think about the amount of arguileh and cigarette products you would purchase, based on the following prices:

|          | Cigarettes premium | Cigarettes discount | Arguileh tobacco premium | Arguileh tobacco discount | Arguileh tobacco non-flavored | Arguileh home delivery | Arguileh café session premium | Arguileh café session at Sha'bi café |
|----------|--------------------|---------------------|--------------------------|---------------------------|-------------------------------|------------------------|-------------------------------|--------------------------------------|
|          | Pack of 20         | Pack of 20          | 250g pack                | 250g pack                 | 250g pack                     | 1 waterpipe            | 1 waterpipe                   | 1 waterpipe                          |
| Price    | 2, 500 L.L         | 750 L.L             | 20, 250 L.L              | 15, 250 L.L               | 67, 500 L.L                   | 25, 250 L.L            | 33, 750 L.L                   | 16, 750 L.L                          |
| Quantity |                    |                     |                          |                           |                               |                        |                               |                                      |

**C3. Think about the amount of arguileh and cigarette products you would purchase, based on the following prices:**

|          | Cigarettes premium | Cigarettes discount | Arguileh tobacco premium | Arguileh tobacco discount | Tombac Ajami | Arguileh home delivery | Arguileh café session premium | Arguileh café session at Sha'bi café |
|----------|--------------------|---------------------|--------------------------|---------------------------|--------------|------------------------|-------------------------------|--------------------------------------|
|          | Pack of 20         | Pack of 20          | 250g pack                | 250g pack                 | 250g pack    | 1 waterpipe            | 1 waterpipe                   | 1 waterpipe                          |
| Price    | 4, 000 L.L         | 1, 250 L.L          | 30, 250 L.L              | 10, 250 L.L               | 45, 000 L.L  | 16, 750 L.L            | 50, 500 L.L                   | 25, 250 L.L                          |
| Quantity |                    |                     |                          |                           |              |                        |                               |                                      |

**C4. Think about the amount of arguileh and cigarette products you would purchase, based on the following prices:**

|          | Cigarettes premium | Cigarettes discount | Arguileh tobacco premium | Arguileh tobacco discount | Tombac Ajami | Arguileh home delivery | Arguileh café session premium | Arguileh café session at Sha'bi café |
|----------|--------------------|---------------------|--------------------------|---------------------------|--------------|------------------------|-------------------------------|--------------------------------------|
|          | Pack of 20         | Pack of 20          | 250g pack                | 250g pack                 | 250g pack    | 1 waterpipe            | 1 waterpipe                   | 1 waterpipe                          |
| Price    | 4, 000 L.L         | 1, 250 L.L          | 45, 500 L.L              | 15, 250 L.L               | 30, 000 L.L  | 11, 250 L.L            | 22, 500 L.L                   | 11, 250 L.L                          |
| Quantity |                    |                     |                          |                           |              |                        |                               |                                      |

C5. Think about the amount of arguileh and cigarette products you would purchase, based on the following prices:

|                | Cigarettes premium | Cigarettes discount | Arguileh tobacco premium | Arguileh tobacco discount | Tombac Ajami | Arguileh home delivery | Arguileh café session premium | Arguileh café session at Sha'bi café |
|----------------|--------------------|---------------------|--------------------------|---------------------------|--------------|------------------------|-------------------------------|--------------------------------------|
|                | Pack of 20         | Pack of 20          | 250g pack                | 250g pack                 | 250g pack    | 1 waterpipe            | 1 waterpipe                   | 1 waterpipe                          |
| Price          | 5, 500 L.L         | 1, 750 L.L          | 13, 500 L.L              | 23, 000 L.L               | 45, 000 L.L  | 16, 750 L.L            | 33, 750 L.L                   | 16, 750 L.L                          |
| Enter quantity |                    |                     |                          |                           |              |                        |                               |                                      |

C6. Think about the amount of arguileh and cigarette products you would purchase, based on the following prices:

|                | Cigarettes premium | Cigarettes discount | Arguileh tobacco premium | Arguileh tobacco discount | Tombac Ajami | Arguileh home delivery | Arguileh café session premium | Arguileh café session at Sha'bi café |
|----------------|--------------------|---------------------|--------------------------|---------------------------|--------------|------------------------|-------------------------------|--------------------------------------|
|                | Pack of 20         | Pack of 20          | 250g pack                | 250g pack                 | 250g pack    | 1 waterpipe            | 1 waterpipe                   | 1 waterpipe                          |
| Price          | 5, 500 L.L         | 1, 750 L.L          | 20, 250 L.L              | 34, 500 L.L               | 30, 000 L.L  | 11, 250 L.L            | 15, 000 L.L                   | 7, 500 L.L                           |
| Enter quantity |                    |                     |                          |                           |              |                        |                               |                                      |

**C7. Think about the amount of arguileh and cigarette products you would purchase, based on the following prices:**

|          | Cigarettes premium | Cigarettes discount | Arguileh tobacco premium | Arguileh tobacco discount | Tombac Ajami | Arguileh home delivery | Arguileh café session premium | Arguileh café session at Sha'bi café |
|----------|--------------------|---------------------|--------------------------|---------------------------|--------------|------------------------|-------------------------------|--------------------------------------|
|          | Pack of 20         | Pack of 20          | 250g pack                | 250g pack                 | 250g pack    | 1 waterpipe            | 1 waterpipe                   | 1 waterpipe                          |
| Price    | 8, 000 L.L         | 2, 500 L.L          | 30, 250 L.L              | 23, 000 L.L               | 20, 000 L.L  | 7, 500 L.L             | 22, 500 L.L                   | 11, 250 L.L                          |
| Quantity |                    |                     |                          |                           |              |                        |                               |                                      |

**C8. Think about the amount of arguileh and cigarette products you would purchase, based on the following prices:**

|          | Cigarettes premium | Cigarettes discount | Arguileh tobacco premium | Arguileh tobacco discount | Tombac Ajami | Arguileh home delivery | Arguileh Café session premium | Waterpipe café session at Sha'bi café |
|----------|--------------------|---------------------|--------------------------|---------------------------|--------------|------------------------|-------------------------------|---------------------------------------|
|          | Pack of 20         | Pack of 20          | 250g pack                | 250g pack                 | 250g pack    | 1 waterpipe            | 1 waterpipe                   | 1 waterpipe                           |
| Price    | 8, 000 L.L         | 2, 500 L.L          | 45, 500 L.L              | 34, 500 L.L               | 67, 500 L.L  | 25, 250 L.L            | 50, 500 L.L                   | 25, 250 L.L                           |
| Quantity |                    |                     |                          |                           |              |                        |                               |                                       |

## VERSION 2

C1. Think about the amount of arguileh and cigarette products you would purchase, based on the following prices:

|          | Cigarettes premium | Cigarettes discount | Arguileh tobacco premium | Arguileh tobacco discount | Tombac Ajami | Arguileh home delivery | Arguileh café session premium | Arguileh café session at Sha'bi café |
|----------|--------------------|---------------------|--------------------------|---------------------------|--------------|------------------------|-------------------------------|--------------------------------------|
|          | Pack of 20         | Pack of 20          | 250g pack                | 250g pack                 | 250g pack    | 1 waterpipe            | 1 waterpipe                   | 1 waterpipe                          |
| Price    | 2, 500 L.L         | 1, 250 L.L          | 30, 250 L.L              | 34, 500 L.L               | 20, 000 L.L  | 11, 250 L.L            | 33, 750 L.L                   | 25, 250 LL                           |
| Quantity |                    |                     |                          |                           |              |                        |                               |                                      |

C2. Think about the amount of arguileh and cigarette products you would purchase, based on the following prices:

|          | Cigarettes premium | Cigarettes discount | Arguileh tobacco premium | Arguileh tobacco discount | Tombac Ajami | Arguileh home delivery | Arguileh café session premium | Arguileh café session at Sha'bi café |
|----------|--------------------|---------------------|--------------------------|---------------------------|--------------|------------------------|-------------------------------|--------------------------------------|
|          | Pack of 20         | Pack of 20          | 250g pack                | 250g pack                 | 250g pack    | 1 waterpipe            | 1 waterpipe                   | 1 waterpipe                          |
| Price    | 2, 500 L.L         | 1, 250 L.L          | 45, 500 L.L              | 23, 000 L.L               | 67, 500 L.L  | 16, 750 L.L            | 15, 000 L.L                   | 11, 250 L.L                          |
| Quantity |                    |                     |                          |                           |              |                        |                               |                                      |

**C3. Think about the amount of arguileh and cigarette products you would purchase, based on the following prices:**

|          | Cigarettes premium | Cigarettes discount | Arguileh tobacco premium | Arguileh tobacco discount | Tombac Ajami | Arguileh home delivery | Arguileh café session premium | Arguileh café session at Sha'bi café |
|----------|--------------------|---------------------|--------------------------|---------------------------|--------------|------------------------|-------------------------------|--------------------------------------|
|          | Pack of 20         | Pack of 20          | 250g pack                | 250g pack                 | 250g pack    | 1 waterpipe            | 1 waterpipe                   | 1 waterpipe                          |
| Price    | 4, 000 L.L         | 750 L.L             | 13, 500 L.L              | 34, 500 L.L               | 45, 000 L.L  | 25, 250 L.L            | 22, 500 L.L                   | 7, 500 L.L                           |
| Quantity |                    |                     |                          |                           |              |                        |                               |                                      |

**C4. Think about the amount of arguileh and cigarette products you would purchase, based on the following prices:**

|          | Cigarettes premium | Cigarettes discount | Arguileh tobacco premium | Arguileh tobacco discount | Tombac Ajami | Arguileh home delivery | Arguileh café session premium | Arguileh café session at Sha'bi café |
|----------|--------------------|---------------------|--------------------------|---------------------------|--------------|------------------------|-------------------------------|--------------------------------------|
|          | Pack of 20         | Pack of 20          | 250g pack                | 250g pack                 | 250g pack    | 1 waterpipe            | 1 waterpipe                   | 1 waterpipe                          |
| Price    | 4, 000 L.L         | 1,750 L.L           | 13, 500 L.L              | 23, 000 L.L               | 45, 000 L.L  | 16, 750 L.L            | 33, 750 L.L                   | 16, 750 L.L                          |
| Quantity |                    |                     |                          |                           |              |                        |                               |                                      |



**C5. Think about the amount of arguileh and cigarette products you would purchase, based on the following prices:**

|                | Cigarettes premium | Cigarettes discount | Arguileh tobacco premium | Arguileh tobacco discount | Tombac Ajami | Arguileh home delivery | Arguileh café session premium | Arguileh café session at Sha'bi café |
|----------------|--------------------|---------------------|--------------------------|---------------------------|--------------|------------------------|-------------------------------|--------------------------------------|
|                | Pack of 20         | Pack of 20          | 250g pack                | 250g pack                 | 250g pack    | 1 waterpipe            | 1 waterpipe                   | 1 waterpipe                          |
| Price          | 5, 500 L.L         | 2, 500 L.L          | 30, 250 L.L              | 15, 250 L.L               | 45, 000 L.L  | 25, 250 L.L            | 15, 000 L.L                   | 11, 250 L.L                          |
| Enter quantity |                    |                     |                          |                           |              |                        |                               |                                      |

**C6. Think about the amount of arguileh and cigarette products you would purchase, based on the following prices:**

|                | Cigarettes premium | Cigarettes discount | Arguileh tobacco premium | Arguileh tobacco discount | Tombac Ajami | Arguileh home delivery | Arguileh café session premium | Arguileh café session at Sha'bi café |
|----------------|--------------------|---------------------|--------------------------|---------------------------|--------------|------------------------|-------------------------------|--------------------------------------|
|                | Pack of 20         | Pack of 20          | 250g pack                | 250g pack                 | 250g pack    | 1 waterpipe            | 1 waterpipe                   | 1 waterpipe                          |
| Price          | 5, 500 L.L         | 2, 500 L.L          | 45, 500 L.L              | 10, 250 L.L               | 30, 000 L.L  | 7, 500 L.L             | 33, 750 L.L                   | 25, 250 L.L                          |
| Enter quantity |                    |                     |                          |                           |              |                        |                               |                                      |

**C7. Think about the amount of arguileh and cigarette products you would purchase, based on the following prices:**

|          | Cigarettes premium | Cigarettes discount | Arguileh tobacco premium | Arguileh tobacco discount | Tombac Ajami | Arguileh home delivery | Arguileh café session premium | Arguileh café session at Sha'bi café |
|----------|--------------------|---------------------|--------------------------|---------------------------|--------------|------------------------|-------------------------------|--------------------------------------|
|          | Pack of 20         | Pack of 20          | 250g pack                | 250g pack                 | 250g pack    | 1 waterpipe            | 1 waterpipe                   | 1 waterpipe                          |
| Price    | 8,000 L.L          | 1,750 L.L           | 13,500 L.L               | 15,250 L.L                | 20,000 L.L   | 11,250 L.L             | 50,500 L.L                    | 16,750 L.L                           |
| Quantity |                    |                     |                          |                           |              |                        |                               |                                      |

**C8. Think about the amount of arguileh and cigarette products you would purchase, based on the following prices:**

|          | Cigarettes premium | Cigarettes discount | Arguileh tobacco premium | Arguileh tobacco discount | Tombac Ajami | Arguileh home delivery | Arguileh Café session premium | Waterpipe café session at Sha'bi café |
|----------|--------------------|---------------------|--------------------------|---------------------------|--------------|------------------------|-------------------------------|---------------------------------------|
|          | Pack of 20         | Pack of 20          | 250g pack                | 250g pack                 | 250g pack    | 1 waterpipe            | 1 waterpipe                   | 1 waterpipe                           |
| Price    | 8,000 L.L          | 1,750 L.L           | 20,250 L.L               | 10,250 L.L                | 67,500 L.L   | 16,750 L.L             | 22,500 L.L                    | 7,500 L.L                             |
| Quantity |                    |                     |                          |                           |              |                        |                               |                                       |

## VERSION 3

C1. Think about the amount of arguileh and cigarette products you would purchase, based on the following prices:

|          | Cigarettes premium | Cigarettes discount | Arguileh tobacco premium | Arguileh tobacco discount | Tombac Ajami | Arguileh home delivery | Arguileh café session premium | Arguileh café session at Sha'bi café |
|----------|--------------------|---------------------|--------------------------|---------------------------|--------------|------------------------|-------------------------------|--------------------------------------|
|          | Pack of 20         | Pack of 20          | 250g pack                | 250g pack                 | 250g pack    | 1 waterpipe            | 1 waterpipe                   | 1 waterpipe                          |
| Price    | 2, 500 L.L         | 1, 750 L.L          | 13, 500 L.L              | 23, 000 L.L               | 30, 000 L.L  | 25, 250 L.L            | 22, 500 L.L                   | 25, 250 LL                           |
| Quantity |                    |                     |                          |                           |              |                        |                               |                                      |

C2. Think about the amount of arguileh and cigarette products you would purchase, based on the following prices:

|          | Cigarettes premium | Cigarettes discount | Arguileh tobacco premium | Arguileh tobacco discount | Tombac Ajami | Arguileh home delivery | Arguileh café session premium | Arguileh café session at Sha'bi café |
|----------|--------------------|---------------------|--------------------------|---------------------------|--------------|------------------------|-------------------------------|--------------------------------------|
|          | Pack of 20         | Pack of 20          | 250g pack                | 250g pack                 | 250g pack    | 1 waterpipe            | 1 waterpipe                   | 1 waterpipe                          |
| Price    | 2, 500 L.L         | 1, 750 L.L          | 20, 250 L.L              | 34, 500 L.L               | 45, 000 L.L  | 7, 500 L.L             | 50, 500 L.L                   | 11, 250 L.L                          |
| Quantity |                    |                     |                          |                           |              |                        |                               |                                      |

**C3. Think about the amount of arguileh and cigarette products you would purchase, based on the following prices:**

|          | Cigarettes premium | Cigarettes discount | Arguileh tobacco premium | Arguileh tobacco discount | Tombac Ajami | Arguileh home delivery | Arguileh café session premium | Arguileh café session at Sha'bi café |
|----------|--------------------|---------------------|--------------------------|---------------------------|--------------|------------------------|-------------------------------|--------------------------------------|
|          | Pack of 20         | Pack of 20          | 250g pack                | 250g pack                 | 250g pack    | 1 waterpipe            | 1 waterpipe                   | 1 waterpipe                          |
| Price    | 4, 000 L.L         | 2, 500 L.L          | 30, 250 L.L              | 23, 000 L.L               | 67, 500 L.L  | 11, 250 L.L            | 33, 750 L.L                   | 7, 500 L.L                           |
| Quantity |                    |                     |                          |                           |              |                        |                               |                                      |

**C4. Think about the amount of arguileh and cigarette products you would purchase, based on the following prices:**

|          | Cigarettes premium | Cigarettes discount | Arguileh tobacco premium | Arguileh tobacco discount | Tombac Ajami | Arguileh home delivery | Arguileh café session premium | Arguileh café session at Sha'bi café |
|----------|--------------------|---------------------|--------------------------|---------------------------|--------------|------------------------|-------------------------------|--------------------------------------|
|          | Pack of 20         | Pack of 20          | 250g pack                | 250g pack                 | 250g pack    | 1 waterpipe            | 1 waterpipe                   | 1 waterpipe                          |
| Price    | 4, 000 L.L         | 2, 500 L.L          | 45, 500 L.L              | 34, 500 L.L               | 20, 000 L.L  | 16, 750 L.L            | 15, 000 L.L                   | 16, 750 L.L                          |
| Quantity |                    |                     |                          |                           |              |                        |                               |                                      |

**C5. Think about the amount of arguileh and cigarette products you would purchase, based on the following prices:**

|                | Cigarettes premium | Cigarettes discount | Arguileh tobacco premium | Arguileh tobacco discount | Tombac Ajami | Arguileh home delivery | Arguileh café session premium | Arguileh café session at Sha'bi café |
|----------------|--------------------|---------------------|--------------------------|---------------------------|--------------|------------------------|-------------------------------|--------------------------------------|
|                | Pack of 20         | Pack of 20          | 250g pack                | 250g pack                 | 250g pack    | 1 waterpipe            | 1 waterpipe                   | 1 waterpipe                          |
| Price          | 5, 500 L.L         | 750 L.L             | 13, 500 L.L              | 10, 250 L.L               | 67, 500 L.L  | 11, 250 L.L            | 50, 500 L.L                   | 11, 250 L.L                          |
| Enter quantity |                    |                     |                          |                           |              |                        |                               |                                      |

**C6. Think about the amount of arguileh and cigarette products you would purchase, based on the following prices:**

|                | Cigarettes premium | Cigarettes discount | Arguileh tobacco premium | Arguileh tobacco discount | Tombac Ajami | Arguileh home delivery | Arguileh café session premium | Arguileh café session at Sha'bi café |
|----------------|--------------------|---------------------|--------------------------|---------------------------|--------------|------------------------|-------------------------------|--------------------------------------|
|                | Pack of 20         | Pack of 20          | 250g pack                | 250g pack                 | 250g pack    | 1 waterpipe            | 1 waterpipe                   | 1 waterpipe                          |
| Price          | 5, 500 L.L         | 750 L.L             | 20, 250 L.L              | 15, 250 L.L               | 20, 000 L.L  | 16, 750 L.L            | 22, 500 L.L                   | 25, 250 L.L                          |
| Enter quantity |                    |                     |                          |                           |              |                        |                               |                                      |

**C7. Think about the amount of arguileh and cigarette products you would purchase, based on the following prices:**

|          | Cigarettes premium | Cigarettes discount | Arguileh tobacco premium | Arguileh tobacco discount | Tombac Ajami | Arguileh home delivery | Arguileh café session premium | Arguileh café session at Sha'bi café |
|----------|--------------------|---------------------|--------------------------|---------------------------|--------------|------------------------|-------------------------------|--------------------------------------|
|          | Pack of 20         | Pack of 20          | 250g pack                | 250g pack                 | 250g pack    | 1 waterpipe            | 1 waterpipe                   | 1 waterpipe                          |
| Price    | 8,000 L.L          | 1, 250 L.L          | 30, 250 L.L              | 10, 250 L.L               | 30, 000 L.L  | 25, 250 L.L            | 15, 000 L.L                   | 16, 750 L.L                          |
| Quantity |                    |                     |                          |                           |              |                        |                               |                                      |

**C8. Think about the amount of arguileh and cigarette products you would purchase, based on the following prices:**

|          | Cigarettes premium | Cigarettes discount | Arguileh tobacco premium | Arguileh tobacco discount | Tombac Ajami | Arguileh home delivery | Arguileh Café session premium | Waterpipe café session at Sha'bi café |
|----------|--------------------|---------------------|--------------------------|---------------------------|--------------|------------------------|-------------------------------|---------------------------------------|
|          | Pack of 20         | Pack of 20          | 250g pack                | 250g pack                 | 250g pack    | 1 waterpipe            | 1 waterpipe                   | 1 waterpipe                           |
| Price    | 8, 000 L.L         | 1, 250 L.L.         | 45, 500 L.L              | 15, 250 L.L               | 45, 000 L.L  | 7, 500 L.L             | 33, 750 L.L                   | 7, 500 L.L                            |
| Quantity |                    |                     |                          |                           |              |                        |                               |                                       |

## VERSION 4

C1. Think about the amount of arguileh and cigarette products you would purchase, based on the following prices:

|          | Cigarettes premium | Cigarettes discount | Arguileh tobacco premium | Arguileh tobacco discount | Tombac Ajami | Arguileh home delivery | Arguileh café session premium | Arguileh café session at Sha'bi café |
|----------|--------------------|---------------------|--------------------------|---------------------------|--------------|------------------------|-------------------------------|--------------------------------------|
|          | Pack of 20         | Pack of 20          | 250g pack                | 250g pack                 | 250g pack    | 1 waterpipe            | 1 waterpipe                   | 1 waterpipe                          |
| Price    | 2, 500 L.L         | 2, 500 L.L          | 30, 250 L.L              | 15, 250 L.L               | 30, 000 L.L  | 16, 750 L.L            | 50, 500 L.L                   | 7, 500 LL                            |
| Quantity |                    |                     |                          |                           |              |                        |                               |                                      |

C2. Think about the amount of arguileh and cigarette products you would purchase, based on the following prices:

|          | Cigarettes premium | Cigarettes discount | Arguileh tobacco premium | Arguileh tobacco discount | Tombac Ajami | Arguileh home delivery | Arguileh café session premium | Arguileh café session at Sha'bi café |
|----------|--------------------|---------------------|--------------------------|---------------------------|--------------|------------------------|-------------------------------|--------------------------------------|
|          | Pack of 20         | Pack of 20          | 250g pack                | 250g pack                 | 250g pack    | 1 waterpipe            | 1 waterpipe                   | 1 waterpipe                          |
| Price    | 2, 500 L.L         | 2, 500 L.L          | 45, 500 L.L              | 10, 250 L.L               | 45, 000 L.L  | 11, 250 L.L            | 22, 500 L.L                   | 16, 750 L.L                          |
| Quantity |                    |                     |                          |                           |              |                        |                               |                                      |

**C3. Think about the amount of arguileh and cigarette products you would purchase, based on the following prices:**

|          | Cigarettes premium | Cigarettes discount | Arguileh tobacco premium | Arguileh tobacco discount | Tombac Ajami | Arguileh home delivery | Arguileh café session premium | Arguileh café session at Sha'bi café |
|----------|--------------------|---------------------|--------------------------|---------------------------|--------------|------------------------|-------------------------------|--------------------------------------|
|          | Pack of 20         | Pack of 20          | 250g pack                | 250g pack                 | 250g pack    | 1 waterpipe            | 1 waterpipe                   | 1 waterpipe                          |
| Price    | 4, 000 L.L         | 1, 750 L.L          | 13, 500 L.L              | 15, 250 L.L               | 67, 500 L.L  | 7, 500 L.L             | 15, 000 L.L                   | 25, 250 L.L                          |
| Quantity |                    |                     |                          |                           |              |                        |                               |                                      |

**C4. Think about the amount of arguileh and cigarette products you would purchase, based on the following prices:**

|          | Cigarettes premium | Cigarettes discount | Arguileh tobacco premium | Arguileh tobacco discount | Tombac Ajami | Arguileh home delivery | Arguileh café session premium | Arguileh café session at Sha'bi café |
|----------|--------------------|---------------------|--------------------------|---------------------------|--------------|------------------------|-------------------------------|--------------------------------------|
|          | Pack of 20         | Pack of 20          | 250g pack                | 250g pack                 | 250g pack    | 1 waterpipe            | 1 waterpipe                   | 1 waterpipe                          |
| Price    | 4, 000 L.L         | 1, 750 L.L          | 20, 250 L.L              | 10, 250 L.L               | 20, 000 L.L  | 25, 250 L.L            | 33, 750 L.L                   | 11, 250 L.L                          |
| Quantity |                    |                     |                          |                           |              |                        |                               |                                      |



C5. Think about the amount of arguileh and cigarette products you would purchase, based on the following prices:

|                | Cigarettes premium | Cigarettes discount | Arguileh tobacco premium | Arguileh tobacco discount | Tombac Ajami | Arguileh home delivery | Arguileh café session premium | Arguileh café session at Sha'bi café |
|----------------|--------------------|---------------------|--------------------------|---------------------------|--------------|------------------------|-------------------------------|--------------------------------------|
|                | Pack of 20         | Pack of 20          | 250g pack                | 250g pack                 | 250g pack    | 1 waterpipe            | 1 waterpipe                   | 1 waterpipe                          |
| Price          | 5, 500 L.L         | 1, 250 L.L          | 30, 250 L.L              | 34, 500 L.L               | 67, 500 L.L  | 7, 500 L.L             | 22, 500 L.L                   | 16, 750 L.L                          |
| Enter quantity |                    |                     |                          |                           |              |                        |                               |                                      |

C6. Think about the amount of arguileh and cigarette products you would purchase, based on the following prices:

|                | Cigarettes premium | Cigarettes discount | Arguileh tobacco premium | Arguileh tobacco discount | Tombac Ajami | Arguileh home delivery | Arguileh café session premium | Arguileh café session at Sha'bi café |
|----------------|--------------------|---------------------|--------------------------|---------------------------|--------------|------------------------|-------------------------------|--------------------------------------|
|                | Pack of 20         | Pack of 20          | 250g pack                | 250g pack                 | 250g pack    | 1 waterpipe            | 1 waterpipe                   | 1 waterpipe                          |
| Price          | 5, 500 L.L         | 1, 250 L.L          | 45, 500 L.L              | 23, 000 L.L               | 20, 000 L.L  | 25, 250 L.L            | 50, 500 L.L                   | 7, 500 L.L                           |
| Enter quantity |                    |                     |                          |                           |              |                        |                               |                                      |

**C7. Think about the amount of arguileh and cigarette products you would purchase, based on the following prices:**

|          | Cigarettes premium | Cigarettes discount | Arguileh tobacco premium | Arguileh tobacco discount | Tombac Ajami | Arguileh home delivery | Arguileh café session premium | Arguileh café session at Sha'bi café |
|----------|--------------------|---------------------|--------------------------|---------------------------|--------------|------------------------|-------------------------------|--------------------------------------|
|          | Pack of 20         | Pack of 20          | 250g pack                | 250g pack                 | 250g pack    | 1 waterpipe            | 1 waterpipe                   | 1 waterpipe                          |
| Price    | 8,000 L.L          | 750 L.L             | 13,500 L.L               | 34,500 L.L                | 30,000 L.L   | 16,750 L.L             | 33,750 L.L                    | 11,250 L.L                           |
| Quantity |                    |                     |                          |                           |              |                        |                               |                                      |

**C8. Think about the amount of arguileh and cigarette products you would purchase, based on the following prices:**

|          | Cigarettes premium | Cigarettes discount | Arguileh tobacco premium | Arguileh tobacco discount | Tombac Ajami | Arguileh home delivery | Arguileh Café session premium | Waterpipe café session at Sha'bi café |
|----------|--------------------|---------------------|--------------------------|---------------------------|--------------|------------------------|-------------------------------|---------------------------------------|
|          | Pack of 20         | Pack of 20          | 250g pack                | 250g pack                 | 250g pack    | 1 waterpipe            | 1 waterpipe                   | 1 waterpipe                           |
| Price    | 8,000 L.L          | 750 L.L.            | 20,250 L.L               | 23,000 L.L                | 45,000 L.L   | 11,250 L.L             | 15,000 L.L                    | 25,250 L.L                            |
| Quantity |                    |                     |                          |                           |              |                        |                               |                                       |

For non-smokers only :

Interviewer: Fill this for non-smokers only. Choose the appropriate option.

- 1- The participant filled out the scenarios
- 2- The participant partially filled out the scenarios or the interviewer completed the scenarios.

STROBE Statement—Checklist of items that should be included in reports of *cross-sectional studies*

|                              | Item No | Recommendation                                                                                                                                                                                    | Page No |
|------------------------------|---------|---------------------------------------------------------------------------------------------------------------------------------------------------------------------------------------------------|---------|
| <b>Title and abstract</b>    | 1       | (a) Indicate the study's design with a commonly used term in the title or the abstract                                                                                                            | 1       |
|                              |         | (b) Provide in the abstract an informative and balanced summary of what was done and what was found                                                                                               | 2       |
| <b>Introduction</b>          |         |                                                                                                                                                                                                   |         |
| Background/rationale         | 2       | Explain the scientific background and rationale for the investigation being reported                                                                                                              | 3       |
| Objectives                   | 3       | State specific objectives, including any prespecified hypotheses                                                                                                                                  | 4       |
| <b>Methods</b>               |         |                                                                                                                                                                                                   |         |
| Study design                 | 4       | Present key elements of study design early in the paper                                                                                                                                           | 4       |
| Setting                      | 5       | Describe the setting, locations, and relevant dates, including periods of recruitment, exposure, follow-up, and data collection                                                                   | 4       |
| Participants                 | 6       | (a) Give the eligibility criteria, and the sources and methods of selection of participants                                                                                                       | 4       |
| Variables                    | 7       | Clearly define all outcomes, exposures, predictors, potential confounders, and effect modifiers. Give diagnostic criteria, if applicable                                                          | 5       |
| Data sources/<br>measurement | 8*      | For each variable of interest, give sources of data and details of methods of assessment (measurement). Describe comparability of assessment methods if there is more than one group              | 5       |
| Bias                         | 9       | Describe any efforts to address potential sources of bias                                                                                                                                         | 5       |
| Study size                   | 10      | Explain how the study size was arrived at                                                                                                                                                         | 4       |
| Quantitative variables       | 11      | Explain how quantitative variables were handled in the analyses. If applicable, describe which groupings were chosen and why                                                                      | 5       |
| Statistical methods          | 12      | (a) Describe all statistical methods, including those used to control for confounding                                                                                                             | 5       |
|                              |         | (b) Describe any methods used to examine subgroups and interactions                                                                                                                               | 5       |
|                              |         | (c) Explain how missing data were addressed                                                                                                                                                       | 5       |
|                              |         | (d) If applicable, describe analytical methods taking account of sampling strategy                                                                                                                | 5       |
|                              |         | (e) Describe any sensitivity analyses                                                                                                                                                             | 5       |
| <b>Results</b>               |         |                                                                                                                                                                                                   |         |
| Participants                 | 13*     | (a) Report numbers of individuals at each stage of study—eg numbers potentially eligible, examined for eligibility, confirmed eligible, included in the study, completing follow-up, and analysed | 4       |
|                              |         | (b) Give reasons for non-participation at each stage                                                                                                                                              |         |
|                              |         | (c) Consider use of a flow diagram                                                                                                                                                                |         |

|                          |     |                                                                                                                                                                                                                                                                                                                                                                                                               |                                                                      |
|--------------------------|-----|---------------------------------------------------------------------------------------------------------------------------------------------------------------------------------------------------------------------------------------------------------------------------------------------------------------------------------------------------------------------------------------------------------------|----------------------------------------------------------------------|
| Descriptive data         | 14* | (a) Give characteristics of study participants (eg demographic, clinical, social) and information on exposures and potential confounders<br>(b) Indicate number of participants with missing data for each variable of interest                                                                                                                                                                               | 5–6                                                                  |
| Outcome data             | 15* | Report numbers of outcome events or summary measures                                                                                                                                                                                                                                                                                                                                                          | 6–12                                                                 |
| Main results             | 16  | (a) Give unadjusted estimates and, if applicable, confounder-adjusted estimates and their precision (eg, 95% confidence interval). Make clear which confounders were adjusted for and why they were included<br>(b) Report category boundaries when continuous variables were categorized<br>(c) If relevant, consider translating estimates of relative risk into absolute risk for a meaningful time period | 6–12<br>p.6 (table 1), p.8 (table 2), p.10 (table 3), p.12 (table 4) |
| Other analyses           | 17  | Report other analyses done—eg analyses of subgroups and interactions, and sensitivity analyses                                                                                                                                                                                                                                                                                                                | p.6 (table 1), p.8 (table 2),                                        |
| <b>Discussion</b>        |     |                                                                                                                                                                                                                                                                                                                                                                                                               |                                                                      |
| Key results              | 18  | Summarise key results with reference to study objectives                                                                                                                                                                                                                                                                                                                                                      | 13                                                                   |
| Limitations              | 19  | Discuss limitations of the study, taking into account sources of potential bias or imprecision. Discuss both direction and magnitude of any potential bias                                                                                                                                                                                                                                                    | 14                                                                   |
| Interpretation           | 20  | Give a cautious overall interpretation of results considering objectives, limitations, multiplicity of analyses, results from similar studies, and other relevant evidence                                                                                                                                                                                                                                    | 13                                                                   |
| Generalisability         | 21  | Discuss the generalisability (external validity) of the study results                                                                                                                                                                                                                                                                                                                                         | 13                                                                   |
| <b>Other information</b> |     |                                                                                                                                                                                                                                                                                                                                                                                                               |                                                                      |
| Funding                  | 22  | Give the source of funding and the role of the funders for the present study and, if applicable, for the original study on which the present article is based                                                                                                                                                                                                                                                 | 15                                                                   |

\*Give information separately for exposed and unexposed groups.

**Note:** An Explanation and Elaboration article discusses each checklist item and gives methodological background and published examples of transparent reporting. The STROBE checklist is best used in conjunction with this article (freely available on the Web sites of PLoS Medicine at <http://www.plosmedicine.org/>, Annals of Internal Medicine at <http://www.annals.org/>, and Epidemiology at <http://www.epidem.com/>). Information on the STROBE Initiative is available at [www.strobe-statement.org](http://www.strobe-statement.org).

# BMJ Open

**Title: Prevalence of Cigarette and Waterpipe Tobacco Smoking among Adults in Three Eastern Mediterranean Countries: A cross-sectional household survey**

|                                 |                                                                                                                                                                                                                                                                                                                                                                                                                                                                                                                                                                                                                                                                                                                                                                                                                                                                                                                                                        |
|---------------------------------|--------------------------------------------------------------------------------------------------------------------------------------------------------------------------------------------------------------------------------------------------------------------------------------------------------------------------------------------------------------------------------------------------------------------------------------------------------------------------------------------------------------------------------------------------------------------------------------------------------------------------------------------------------------------------------------------------------------------------------------------------------------------------------------------------------------------------------------------------------------------------------------------------------------------------------------------------------|
| Journal:                        | <i>BMJ Open</i>                                                                                                                                                                                                                                                                                                                                                                                                                                                                                                                                                                                                                                                                                                                                                                                                                                                                                                                                        |
| Manuscript ID                   | bmjopen-2021-055201.R2                                                                                                                                                                                                                                                                                                                                                                                                                                                                                                                                                                                                                                                                                                                                                                                                                                                                                                                                 |
| Article Type:                   | Original research                                                                                                                                                                                                                                                                                                                                                                                                                                                                                                                                                                                                                                                                                                                                                                                                                                                                                                                                      |
| Date Submitted by the Author:   | 29-Dec-2021                                                                                                                                                                                                                                                                                                                                                                                                                                                                                                                                                                                                                                                                                                                                                                                                                                                                                                                                            |
| Complete List of Authors:       | Nakkash, Rima; American University of Beirut Department of Health Promotion and Community Health<br>Khader, Yousef; Jordan University of Science and Technology, Department of Community Medicine, Public Health and Family Medicine, Faculty of Medicine<br>Chalak, Ali; American University of Beirut, Department of Agriculture, Faculty of Agricultural and Food Sciences<br>Abla, Ruba; American University of Beirut, Faculty of Health Sciences<br>Abu-Rmeileh, Niveen; Birzeit University, Institute of Community and Public Health<br>Mostafa, Aya; Ain Shams University Faculty of Medicine, Department of Community, Environmental and Occupational Medicine<br>Jawad, Mohammed; Imperial College London School of Public Health, Public Health Policy Evaluation Unit<br>Lee, Ji-Hyun; University of Florida, Department of Biostatistics and UF Health Cancer Center<br>Salloum, Ramzi; University of Florida, Health Outcomes and Policy |
| <b>Primary Subject Heading</b>: | Public health                                                                                                                                                                                                                                                                                                                                                                                                                                                                                                                                                                                                                                                                                                                                                                                                                                                                                                                                          |
| Secondary Subject Heading:      | Smoking and tobacco                                                                                                                                                                                                                                                                                                                                                                                                                                                                                                                                                                                                                                                                                                                                                                                                                                                                                                                                    |
| Keywords:                       | PUBLIC HEALTH, EPIDEMIOLOGY, Health policy < HEALTH SERVICES ADMINISTRATION & MANAGEMENT                                                                                                                                                                                                                                                                                                                                                                                                                                                                                                                                                                                                                                                                                                                                                                                                                                                               |
|                                 |                                                                                                                                                                                                                                                                                                                                                                                                                                                                                                                                                                                                                                                                                                                                                                                                                                                                                                                                                        |

SCHOLARONE™  
Manuscripts



I, the Submitting Author has the right to grant and does grant on behalf of all authors of the Work (as defined in the below author licence), an exclusive licence and/or a non-exclusive licence for contributions from authors who are: i) UK Crown employees; ii) where BMJ has agreed a CC-BY licence shall apply, and/or iii) in accordance with the terms applicable for US Federal Government officers or employees acting as part of their official duties; on a worldwide, perpetual, irrevocable, royalty-free basis to BMJ Publishing Group Ltd ("BMJ") its licensees and where the relevant Journal is co-owned by BMJ to the co-owners of the Journal, to publish the Work in this journal and any other BMJ products and to exploit all rights, as set out in our [licence](#).

The Submitting Author accepts and understands that any supply made under these terms is made by BMJ to the Submitting Author unless you are acting as an employee on behalf of your employer or a postgraduate student of an affiliated institution which is paying any applicable article publishing charge ("APC") for Open Access articles. Where the Submitting Author wishes to make the Work available on an Open Access basis (and intends to pay the relevant APC), the terms of reuse of such Open Access shall be governed by a Creative Commons licence – details of these licences and which [Creative Commons](#) licence will apply to this Work are set out in our licence referred to above.

Other than as permitted in any relevant BMJ Author's Self Archiving Policies, I confirm this Work has not been accepted for publication elsewhere, is not being considered for publication elsewhere and does not duplicate material already published. I confirm all authors consent to publication of this Work and authorise the granting of this licence.

**Title:** Prevalence of cigarette and waterpipe tobacco smoking among adults in three Eastern Mediterranean countries: a cross-sectional household survey

**Authors**

Rima Nakkash<sup>1</sup>, Yousef Khader<sup>2</sup>, Ali Chalak<sup>3</sup>, Ruba Abla<sup>1</sup>, Niveen M.E. Abu-Rmeileh<sup>4</sup>, Aya Mostafa<sup>5</sup>, Mohammed Jawad<sup>6</sup>, Ji-Hyun Lee<sup>7</sup>, Ramzi G. Salloum<sup>1,8</sup>

**Affiliations**

1. Department of Health Promotion and Community Health, Faculty of Health Sciences, American University of Beirut, Beirut, Lebanon
2. Department of Community Medicine, Public Health and Family Medicine, Faculty of Medicine, Jordan University of Science and Technology, Irbid, Jordan
3. Department of Agriculture, Faculty of Agricultural and Food Sciences, American University of Beirut, Beirut, Lebanon
4. Institute of Community and Public Health, Birzeit University, Birzeit, Palestine
5. Department of Community, Environmental and Occupational Medicine, Faculty of Medicine, Ain Shams University, Cairo, Egypt
6. Public Health Policy Evaluation Unit, Imperial College London, London, United Kingdom
7. Department of Biostatistics and UF Health Cancer Center, University of Florida, Gainesville, FL, USA
8. Department of Health Outcomes and Biomedical Informatics, College of Medicine, University of Florida, Gainesville, FL, USA

Corresponding Author:

Rima Nakkash

Riad El-Solh / Beirut 1107 2020

American University of Beirut

Email: [rn06@aub.edu.lb](mailto:rn06@aub.edu.lb)

Word count: 3661

Tables/figures: 5 tables

References: 29

## ABSTRACT

**Objectives:** Tobacco smoking is on the rise in the Eastern Mediterranean region. In light of limited surveillance of smoking in the region, this study sought to understand the prevalence of cigarette and waterpipe smoking among adults and the factors associated with smoking in Lebanon, Jordan, and Palestine (West Bank only).

**Design, setting and participants:** Household surveys were conducted with participants over the age of 18 in Lebanon (n=1680), Jordan (n=1925) and Palestine (n=1679) between June and August 2019. A multistage cluster sampling approach with probability-proportional-to-size random selection method was followed in the three countries.

**Primary and secondary outcome measures:** Gender-specific prevalence rates for cigarette and waterpipe smoking were estimated. Multivariable logistic regression was used to examine factors associated with current cigarette and waterpipe tobacco smoking.

**Results:** The prevalence of cigarette smoking among males and females respectively was 48.6% and 21.5% in Lebanon, 50.4% and 9.1% in Jordan, and 53.4% and 3.1% in Palestine. The prevalence of waterpipe smoking among males and females respectively was 32.7% and 46.2% in Lebanon, 13.4% and 7.8% in Jordan, and 18.0% and 7.9% in Palestine. Cigarette smokers were significantly ( $p<0.05$ ) more likely to be male, younger, and with lower educational attainment across the three countries. Waterpipe smokers were more likely to be young adults across the three countries ( $p<0.001$ ). They were more likely to be male in Jordan and Palestine, and more likely to be female in Lebanon.

**Conclusions:** The high prevalence rates of smoking in Lebanon, Jordan, and Palestine are concerning. Continued surveillance is key to monitor smoking patterns and inform stronger tobacco control measures.

**Keywords:** cigarette smoking, waterpipe tobacco smoking, smoking prevalence, surveillance

### Strengths and Limitations of the study:

- The study reports contemporary estimates of smoking prevalence using large, nationally representative surveys, that have been consistently lacking in previous studies.
- The study used standardized questionnaires across the three countries, allowing for valid cross-country comparisons.
- Tobacco use was self-reported and not biochemically verified and only a small number of females reported current smoking in Jordan and Palestine, which may have underreported prevalence.
- The study did not report on use of other alternative smoking products which are increasingly more available in the loosely regulated markets of those countries.

## INTRODUCTION



Smoking is the leading cause of preventable death as well as a main risk factor for cancer, cardiovascular and pulmonary diseases. Although considerable progress has been achieved in curbing the tobacco epidemic in many parts of the world, smoking trends continue to increase in low- and middle-income countries[1]. One notable example has been the Eastern Mediterranean region (EMR) –which the World Health Organization (WHO) has projected the smoking prevalence to increase by 2025[2]. Cigarette smoking is highly prevalent in the EMR, due to weak regulatory environments, insufficient surveillance infrastructure and interference from a strong tobacco industry[3]. The problem is compounded by the wide prevalence of waterpipe tobacco smoking[4]. Waterpipe smoking rates in the region are considered the highest worldwide, with notably high prevalence among young adults[5]. This pattern is attributed to multiple factors, including the perception of waterpipe smoking as a less harmful alternative to cigarette smoking, the café culture encouraging social smoking of the waterpipe, and appeal of flavored waterpipe tobacco[6, 7].

The WHO Framework Convention on Tobacco Control requires parties to collect data on tobacco use and exposure on a regular basis to monitor smoking trends and policy implementation[8]. To date, surveillance of tobacco use among adults in the EMR has been limited. For example, routinely available data from the Global Adult Tobacco Survey (GATS) are only available in Egypt (2009)[9], Qatar (2013)[10] and Pakistan (2014)[11]. Other surveillance efforts in the region have been limited to specific populations, such as youth[12], university students[13, 14], and healthcare professionals [15]. These limitations in the available smoking prevalence data justify the need for detailed national prevalence data on both cigarette and waterpipe smoking among adults in Eastern Mediterranean countries.

In Lebanon, the most recent national estimates for adult cigarette smoking date back to 2013[2] when the prevalence of current cigarette smoking was 34% among males and 19% among females. The national estimates for waterpipe tobacco smoking prevalence (25.3%) date back to 2009, when the prevalence rate was 26.5% among males and 24.3% among females[16]. According to Jordan STEPS 2019 survey, 65.3% of men and 16.4% of women were current smokers of any tobacco products[17]. As for Palestine, the most recent national estimates were from the Palestinian Family Survey in 2010, when the prevalence rate for cigarette smoking was 29.9% among adults (49.7% among men and 3.5% among women)[18].

Given that the most recent national prevalence estimates across the three countries date back to one decade, this study sought to estimate contemporary prevalence rates of current cigarette and waterpipe smoking in Lebanon, Jordan, and Palestine (West Bank only), and their correlates. Further, the issue of dual tobacco use has not been sufficiently explored in studies coming from the region, and as such, this study examined the dual use of cigarette and waterpipe tobacco in these three countries.

## **METHODS**

### **Data source**

We conducted nationally-representative in-person cross-sectional household surveys in Lebanon, Jordan, and Palestine between June and August 2019. Eligible respondents included males and females aged 18 years and older, residing in each of the countries as their primary place of residence, regardless of nationality.

1  
2  
3  
4 The sample size was calculated to estimate the prevalence of current waterpipe smoking for males  
5 and females in each country based on previously reported prevalence rates [2, 19] with a margin  
6 of error of 5% if the prevalence rate is more than 10% or with a margin of error of half of the  
7 assumed prevalence if it is less than 10%. The average number of individuals or households  
8 sampled per cluster and the design effect were taken into consideration. A design effect of 2.0 was  
9 used based on the recommendations of the GATS manual. With an 80% power and  $\alpha=0.05$ , the  
10 minimum number of clusters needed in the countries ranged from 16 to 28 and the number of  
11 subjects ranged from 480 to 840 persons. Since one male and one female were to be selected from  
12 each household, the largest number of clusters and households (28 clusters and 1680 subjects; 840  
13 men and 840 women) was the sample size for each country.  
14  
15

16  
17 A multistage cluster sampling approach with probability-proportional-to-size random selection  
18 method was followed. In each country, the sample of households was chosen in two stages. First,  
19 well-defined clusters were selected within each governorate (i.e., province). Second, housing  
20 units were selected within each selected cluster. The sampling frame for clusters was specific to  
21 the characteristics of each country. In Lebanon, all eight governorates were selected for  
22 sampling: Akkar, Baalbek-Hermel, Bekaa, Beirut, Mount Lebanon, Nabatieh, North Lebanon,  
23 and South Lebanon. In Jordan, all 12 governorates were included in the study: Ajloun, Amman,  
24 Aqaba, Balqa, Irbid, Jerash, Karak, Ma'an, Madaba, Mafraq, Tafilah, and Zarqa. In Palestine, all  
25 11 governorates of the West Bank were selected: Bethlehem, East Jerusalem, Hebron, Jenin,  
26 Qalqilya, Nablus, Ramallah and Al-Bireh, Jericho, Salfit, Tubas, and Tulkarm. The Palestinian  
27 governorates in Gaza were excluded due to logistical barriers. The second stage of household  
28 selection involved choosing a random sample of 30 households from a complete list of  
29 households in a selected area, based on local administrative sources or household lists from the  
30 most recent census. One eligible male and one female resident, who consider the site of data  
31 collection as their primary place of residence, were selected from each selected household. In  
32 Lebanon and Palestine, if an eligible female or male was not available for interview at the time  
33 of household visit, additional households were selected until an equal number of males and  
34 females was reached. In Jordan, additional households were selected that yielded a higher  
35 number of males than females. After eligibility screening, we provided potential respondents  
36 with information about the study and asked them to provide verbal consent to participate as per  
37 IRB approval. With the exception of aforementioned respondent selection, the same methods and  
38 recruitment protocol were used in all three countries.  
39  
40  
41  
42

### 43 **Data collection**

44 Data were collected using the same structured, Arabic-language questionnaire, with selected  
45 questions tailored to local context for each country. In the three countries, the surveys were  
46 administered face-to-face by trained interviewers. Prior to data collection, each country team  
47 pretested the questionnaires with 10-15 individuals of similar characteristics to that of the survey  
48 respondents. Minor amendments to wordings of a few questions were applied. Each country  
49 team then piloted with 10-15 individuals before data collection proceeded. No changes following  
50 piloting were needed. Data collectors in the three countries were trained on the ethics of data  
51 collection, consenting, sampling methodology and on the survey questions, using the same  
52 training manual. The training included a review of each questionnaire item, followed by practice  
53 sessions which involved role play as interviewer and interviewee which focused on probing to  
54  
55  
56  
57  
58  
59  
60

1  
2  
3 make sure all interviewees give full answers to ensure that there is no missing data for the  
4 analysis. It is important to note that the missing data are minimal (<1%) because of the quality  
5 control and assurance procedures implemented.  
6  
7

### 8 **Measures**

9 Respondents were asked if they had ever tried cigarettes or waterpipe tobacco. Among ever users  
10 of each product, respondents were asked if they were current users of the product. Current  
11 cigarette smoking was defined as currently smoking cigarettes every day or some days.  
12 Similarly, current waterpipe smoking was defined as currently smoking tobacco in a waterpipe  
13 every day or some days. Among current cigarette smokers, respondents were asked about the  
14 number of cigarettes smoked per day. Dual current smokers included both cigarette and  
15 waterpipe smokers while any current smoker included cigarette or waterpipe smokers. Among  
16 current waterpipe tobacco smokers, respondents were asked about the number of waterpipe  
17 sessions they smoked at home per week, the number of waterpipe sessions they smoked in a café  
18 per week, and whether they usually smoked flavored waterpipe tobacco. We assessed the  
19 demographic characteristics of respondents, including their sex, age in years, marital status,  
20 educational attainment, and household monthly income. The survey instrument can be found as  
21 supplementary material.  
22  
23  
24

### 25 **Statistical analysis**

26 Descriptive statistics were used to summarize the study participants' demographic and socio-  
27 economic characteristics. We estimated overall gender-specific prevalence rates of cigarettes and  
28 waterpipe smoking and their 95% confidence intervals (CI) within each country. For the purpose  
29 of calculation of age-standardized prevalence rates, the WHO World Standard Population which  
30 reflects the average age structure of the world's population expected over the next generation,  
31 from 2000 to 2025 was used[20]. Multivariable logistic regression analysis was conducted to  
32 examine factors associated with current cigarette smoking and current waterpipe smoking in  
33 separate models for each country. The independent variables tested in these models included  
34 gender (female vs. male), age group in years (18-29, 30-49, 50-64, and 65 or older), educational  
35 attainment (primary school or less, middle school, high school/diploma, and university), marital  
36 status (ever married vs. never married) and individual monthly income (quartiles within each  
37 country). Odds ratios (ORs) and their 95% CIs were estimated from the models. A p-value of  
38 less than 0.05 was considered statistically significant. Respondents with missing data on outcome  
39 measures or covariates were excluded from models on a case-wise basis. Data were analyzed  
40 using Stata statistical software version 16 (StataCorp, College Station, TX).  
41  
42  
43  
44

### 45 **Patient and Public Involvement**

46 There was no patient public involvement in the design, conduct, reporting, or dissemination  
47 plans of our research.  
48

### 49 **RESULTS**

50 A total of 1,680 respondents in Lebanon, 1,925 in Jordan, and 1,679 in Palestine completed the  
51 surveys. The number of non-respondents (rate) was 862 (33.9%) in Lebanon, 74 (3.7%) in  
52 Jordan and 141 (7.7%) in Palestine.  
53

54 Table 1 presents the characteristics of respondents by gender in each country. Females  
55 represented 50.0% of the sample in Lebanon, 44.6% in Jordan and 50.0% in Palestine. Almost  
56  
57  
58  
59  
60

45.1% of respondents in Lebanon, 45.9% of respondents in Jordan, and 41.3% of respondents in Palestine were younger than 50 years old. The majority (80.8%) of respondents in Lebanon, 75% of respondents in Jordan and 81.5% of respondents in Palestine were ever married. Almost one-fifth (20.7%) of respondents in Lebanon, 25.1 % in Jordan, and 16.2 % in Palestine had completed university education.

Table 1. Socio-demographic characteristics by gender and country 2019

| Variable               | Lebanon         |                   | Jordan           |                   | Palestine       |                   |
|------------------------|-----------------|-------------------|------------------|-------------------|-----------------|-------------------|
|                        | Male<br>(n=840) | Female<br>(n=840) | Male<br>(n=1067) | Female<br>(n=858) | Male<br>(n=839) | Female<br>(n=840) |
|                        | (%) n           | (%) n             | (%) n            | (%) n             | (%) n           | (%) n             |
| <b>Age, in years</b>   |                 |                   |                  |                   |                 |                   |
| 18 – 29                | (22.7) 191      | (29.3) 246        | (26.4) 282       | (27.7) 238        | (32.9) 276      | (25.7) 216        |
| 30 – 49                | (44.5) 374      | (45.7) 384        | (45.2) 482       | (46.6) 400        | (37.8) 317      | (44.8) 376        |
| 50 – 64                | (28.3) 238      | (23.2) 195        | (19.9) 212       | (18.9) 162        | (25.4) 213      | (28.6) 240        |
| ≥65                    | (4.4) 37        | (1.8) 15          | (8.5) 91         | (6.8) 58          | (3.9) 33        | (1.0) 8           |
| <b>Marital Status</b>  |                 |                   |                  |                   |                 |                   |
| Never married          | (20.4) 170      | (18.1) 153        | (25.0) 210       | (12.1) 102        | (22.1) 185      | (8.2) 69          |
| Ever married           | (79.8) 670      | (81.8) 687        | (75.0) 629       | (75.0) 738        | (75.0) 629      | (87.9) 738        |
| <b>Education</b>       |                 |                   |                  |                   |                 |                   |
| Primary school or less | (17.4)146       | (11.9) 100        | (22.3) 238       | (24.0) 206        | (44.3) 372      | (50.4) 423        |
| Middle school          | (21.7) 182      | (21.3) 179        | (41.1) 439       | (36.6) 314        | (33.7) 283      | (25.8) 217        |
| High school/diploma    | (40.0) 336      | (46.4) 390        | (12.0) 128       | (13.9) 119        | (7.5) 63        | (5.9) 50          |
| University             | (21.0) 176      | (20.4) 171        | (24.6) 262       | (25.5) 219        | (14.4) 121      | (17.9) 150        |
| <b>Monthly Income*</b> |                 |                   |                  |                   |                 |                   |
| Quartile 1             | (7.51) 62       | (9.1) 75          | (21.7) 227       | (24.9) 207        | (21.2) 174      | (26.6) 214        |
| Quartile 2             | (39.5) 326      | (38.8) 321        | (39.4) 411       | (38.5) 320        | (41.9) 344      | (44.0) 355        |
| Quartile 3             | (39.1) 323      | (38.7) 320        | (25.1) 262       | (23.7) 197        | (19.8) 163      | (16.5) 133        |
| Quartile 4             | (13.9) 115      | (13.4) 111        | (13.8) 144       | (12.9) 107        | (17.0) 140      | (12.9) 104        |
| No income              | (1.7) 14        | (1.6) 13          | (2.2) 23         | (3.2) 27          | (2.2) 18        | (4.0) 34          |

\*Income quartile levels: **Lebanon:** [1] <\$529.88; [2] \$529.88 - < \$993.53; [3] \$993.53 - < \$1,987.05; [4] ≥ \$1,987.05. **Jordan:** [1] < \$423.13; [2] \$423.13 = < \$705.22; [3] \$705.22 - < \$1,269.39. **Palestine:** [1] < \$610.04; \$610.04 - < \$1,067.57; [3] \$1,067.57 - < \$1,525.10; [4] ≥ 1,525.10.

### Prevalence of cigarette and waterpipe tobacco smoking

Table 2 shows the crude and age-standardized prevalence rates of current cigarette smoking, current waterpipe smoking, dual smoking and any smoking, by country. Overall, the crude prevalence rate (95% CI) for current cigarette smoking was 35.1% (32.8, 37.4) in Lebanon, 32.0% (29.9, 34.1) in Jordan and 28.2% (26.1, 30.5) in Palestine. The prevalence rate for current waterpipe smoking was 39.5% (37.1, 41.8) in Lebanon, 11.0% (9.6, 12.4) in Jordan, and 12.9% (11.4, 14.6) in Palestine. The overall rate for dual current smoking was 3.6% (2.8, 4.6) in

Lebanon, 2.8% (2.1, 3.6) in Jordan, and 4.4% (3.5, 5.5) in Palestine. As for any current smoking, the prevalence rate was 70.9% (68.7, 73.1) in Lebanon, 40.2% (38.0, 42.4) in Jordan, and 36.7% (34.4, 39.1) in Palestine. Respectively, the age standardized prevalence rates of current cigarette and waterpipe smoking were 27.8% and 38.1% in Lebanon, 25.5% and 12.0% in Jordan, and 26.3% and 14.1% in Palestine.

Table 2. Crude and age-standardized prevalence rates (ASR) and their 95% confidence intervals (CI) of current cigarette smoking, current waterpipe smoking, dual smoking, and any smoking in Lebanon, Jordan, and Palestine, 2019.

| Country/<br>gender | Current cigarette smoking |                      | Current waterpipe smoking |                      | Dual smoking       |                   | Any Smoking          |                      |
|--------------------|---------------------------|----------------------|---------------------------|----------------------|--------------------|-------------------|----------------------|----------------------|
|                    | Crude<br>(95% CI)         | ASR<br>(95% CI)      | Crude<br>(95% CI)         | ASR<br>(95% CI)      | Crude<br>(95% CI)  | ASR<br>(95% CI)   | Crude<br>(95% CI)    | ASR (95%<br>CI)      |
| <b>Lebanon</b>     |                           |                      |                           |                      |                    |                   |                      |                      |
| Male               | 48.6<br>(45.1, 52.0)      | 38.6<br>(30.9, 46.4) | 32.7<br>(29.6, 36.0)      | 35.6<br>(26.4, 44.7) | 5.5<br>(4.0, 7.2)  | 5.8<br>(2.1, 9.6) | 75.8<br>(72.8, 78.7) | 68.4<br>(57.0, 79.8) |
| Female             | 21.5<br>(18.8, 24.5)      | 15.9<br>(11.3, 20.5) | 46.2<br>(42.8, 49.6)      | 39.8<br>(29.4, 50.3) | 1.8<br>(1.0, 2.9)  | 0.9<br>(0.4, 1.3) | 66.0<br>(62.6, 69.2) | 54.9<br>(43.5, 66.3) |
| Total              | 35.1<br>(32.8, 37.4)      | 27.8<br>(22.9, 32.6) | 39.5<br>(37.1, 41.8)      | 38.1<br>(31.2, 44.9) | 3.6<br>(2.8, 4.6)  | 3.6<br>(1.4, 5.7) | 70.9<br>(68.7, 73.1) | 62.3<br>(54.1, 70.4) |
| <b>Jordan</b>      |                           |                      |                           |                      |                    |                   |                      |                      |
| Male               | 50.4<br>(47.4, 53.5)      | 39.7<br>(32.9, 46.4) | 13.5<br>(11.5, 15.7)      | 15.1<br>(9.4, 20.7)  | 4.3<br>(3.2, 5.7)  | 4.6<br>(1.6, 7.6) | 59.6<br>(56.6, 62.6) | 50.1<br>(41.9, 58.3) |
| Female             | 9.1<br>(7.3, 11.2)        | 8.0<br>(4.2, 11.8)   | 7.8<br>(6.1, 9.8)         | 8.3<br>(3.8, 12.9)   | 0.8<br>(0.3, 1.7)  | 0.5<br>(0.1, 0.9) | 16.1<br>(13.7, 18.7) | 15.9<br>(10.0, 21.8) |
| Total              | 32.0<br>(29.9, 34.1)      | 25.5<br>(21.4, 29.6) | 11.0<br>(9.6, 12.4)       | 12.0<br>(8.3, 15.7)  | 2.8<br>(2.1, 3.6)  | 2.8<br>(1.1, 4.4) | 40.2<br>(38.0, 42.4) | 34.8<br>(29.6, 40.0) |
| <b>Palestine</b>   |                           |                      |                           |                      |                    |                   |                      |                      |
| Male               | 53.4<br>(50.0, 56.8)      | 45.0<br>(37.5, 52.6) | 18.0<br>(15.5, 20.8)      | 16.6<br>(11.5, 21.7) | 8.0<br>(6.2, 10.0) | 6.4<br>(3.5, 9.2) | 63.4<br>(60.0, 66.7) | 55.3<br>(46.6, 63.9) |
| Female             | 3.1<br>(2.0, 4.5)         | 1.6<br>(1.0, 2.3)    | 7.9<br>(6.1, 9.9)         | 12.2<br>(4.6, 19.9)  | 0.8<br>(0.3, 1.7)  | 0.5<br>(0.1, 0.9) | 10.1<br>(8.2, 12.4)  | 13.4<br>(5.7, 21.0)  |
| Total              | 28.2<br>(26.1, 30.5)      | 26.3<br>(21.2, 31.4) | 12.9<br>(11.4, 14.6)      | 14.1<br>(9.9, 18.2)  | 4.4<br>(3.5, 5.5)  | 3.8<br>(2.0, 5.7) | 36.7<br>(34.4, 39.1) | 36.5<br>(30.3, 42.8) |

### Patterns of cigarette and waterpipe smoking

Table 3 presents the patterns of cigarette and waterpipe smoking among current smokers according to gender and country. In Lebanon, almost half of current cigarette smokers reported smoking  $\geq 20$  cigarettes per day (42.6% of males and 51.9% of females). In Jordan, more than half of male current cigarette smokers (52.0%) and one third of female cigarette smokers (33.3%) reported smoking  $\geq 20$  cigarettes per day. In Palestine, among those who currently smoke cigarettes, 37.5% of males and 3.8% of females reported smoking  $\geq 20$  cigarettes per day.

The majority of waterpipe smokers in Lebanon used flavored tobacco (86.2% of males and 89.2% of females), smoked more than 3 sessions at home (92.5% of males and 86.9% of females) and smoked three sessions or less per week in a café (90.0% of males and 96.3% of females). In Jordan, the majority of waterpipe smokers used flavored tobacco (92.3% of males and 98.5% of females), the majority of male respondents (70.5%) and less than half of females

(46.9%) smoked more than three waterpipe sessions at home, and the majority of respondents smoked three sessions or less per week in a café (62.9% of males and 85.7% of females). In Palestine, the majority of waterpipe smokers used flavored tobacco (94.6% of males and 93.9% of females), 85.7% of males and 95.4% of females smoked more than 3 sessions of waterpipe at home, and 97.7% of males and 95.5% of females smoked three sessions or less per week in a café.

Table 3. Patterns of cigarette and waterpipe smoking among current smokers according to gender by country in 2019

| Variable                                | Lebanon        |                | Jordan         |               | Palestine      |               |
|-----------------------------------------|----------------|----------------|----------------|---------------|----------------|---------------|
|                                         | Males          | Females        | Males          | Females       | Males          | Females       |
|                                         | (%) n          | (%) n          | (%) n          | (%) n         | (%) n          | (%) n         |
| Cigarettes per day                      |                |                |                |               |                |               |
| <10                                     | (35.0) 143     | (34.8) 63      | (3.4) 18       | (18.0) 14     | (9.4) 42       | (23.1) 6      |
| 10 – 20                                 | (42.6) 174     | (51.9) 94      | (44.6) 240     | (48.7) 38     | (53.1) 238     | (73.1) 19     |
| >20                                     | (22.3) 91      | (13.3) 24      | (52.0) 280     | (33.3) 26     | (37.5) 168     | (3.8) 1       |
| Total                                   | (100.0)<br>408 | (100.0)<br>181 | (100.0)<br>538 | (100.0)<br>78 | (100.0)<br>448 | (100.0)<br>26 |
| Waterpipe sessions at home,<br>per week |                |                |                |               |                |               |
| ≤3                                      | (7.5) 19       | (13.1) 49      | (29.5) 33      | (53.1) 34     | (85.7) 108     | (95.4) 62     |
| >3                                      | (92.5) 234     | (86.9) 326     | (70.5) 79      | (46.9) 30     | (14.3) 18      | (4.6) 3       |
| Waterpipe sessions at café, per<br>week |                |                |                |               |                |               |
| ≤3                                      | (90.9) 180     | (96.3) 236     | (62.9) 22      | (85.7) 6      | (97.7) 85      | (95.5) 21     |
| >3                                      | (9.1) 18       | (3.7) 9        | (37.1) 13      | (14.3) 1      | (2.3) 2        | (4.5) 1       |
| Type of waterpipe tobacco<br>smoked     |                |                |                |               |                |               |
| Flavored                                | (86.2) 237     | (89.2) 346     | (92.3) 132     | (98.5) 66     | (94.6) 141     | (93.9) 62     |
| Non-flavored                            | (13.8) 38      | (10.8) 42      | (7.7) 11       | (1.5) 1       | (5.4) 8        | (6.1) 4       |

### Factors associated with current cigarette smoking

Table 4 presents the results of the multivariable analysis of factors associated with current cigarette smoking by country and the adjusted odds ratio. In Lebanon, males were more likely than females to be current cigarette smokers (OR: 5.07; 95% CI: 3.73, 6.89). Compared with young adults 18-29 years old, respondents who were older were more likely to be current smokers: (OR: 5.52; 95% CI: 3.22, 9.49) among those 30-49 years old, (OR: 6.34; 95% CI: 3.57, 11.26) among adults 50-64 years old, and (OR: 2.84; 95% CI: 1.15, 7.05) among adults  $\geq 65$  years old. Compared with adults who had a primary school education or less, adults with a high school education (OR: 0.44; 95% CI: 0.27, 0.72) and those with a university education (OR: 0.52; 95% CI: 0.29, 0.92) were significantly less likely to be current cigarette smokers.

In Jordan, males were significantly more likely than females to be current cigarette smokers (OR: 13.77; 95% CI: 9.29, 20.44). Adults  $\geq 65$  years old were less likely than those 18-29 years old to be current cigarette smokers (OR: 0.35; 95% CI: 0.19, 0.65). Compared with adults who had a primary school education or less, adults with a high school education (OR: 0.61; 95% CI: 0.38, 0.97) and those with a university education (OR: 0.61; 95% CI: 0.41, 0.91) were less likely to be current cigarette smokers. In addition, adults in the highest income quartile were significantly more likely to be current smokers compared with adults in the lowest income quartile (OR: 1.68; 95% CI: 1.05, 2.69).

Finally, in Palestine, males were also significantly more likely than females to be current cigarette smokers (OR: 66.95; 95% CI: 29.28, 153.10). Adults  $\geq 65$  years old were less likely than those 18-29 years old to be cigarette smokers (OR: 0.33; 95% CI: 0.12, 0.88). Compared to adults with a primary school education or less, adults with a middle school education (OR: 0.58; 95% CI: 0.39, 0.84) and those with a university education (OR: 0.57; 95% CI: 0.35, 0.93) were significantly less likely to be current cigarette smokers.

Table 4. Multivariable analysis of factors associated with current cigarette smoking among adults by country in 2019

| Variable               | Lebanon              |        | Jordan               |        | Palestine             |        |
|------------------------|----------------------|--------|----------------------|--------|-----------------------|--------|
|                        | Adjusted OR (95% CI) | p      | Adjusted OR (95% CI) | p      | Adjusted OR (95% CI)  | p      |
| <b>Gender</b>          |                      |        |                      |        |                       |        |
| Female                 | reference            |        | reference            |        | reference             |        |
| Male                   | 5.07 (3.73, 6.89)    | <0.001 | 13.77 (9.29, 20.44)  | <0.001 | 66.95 (29.28, 153.10) | <0.001 |
| <b>Age, in years</b>   |                      |        |                      |        |                       |        |
| 18 – 29                | reference            |        | reference            |        | reference             |        |
| 30 – 49                | 5.52 (3.22, 9.49)    | <0.001 | 1.06 (0.77, 1.54)    | 0.76   | 1.43 (0.89, 2.27)     | 0.13   |
| 50 – 64                | 6.34 (3.57, 11.26)   | <0.001 | 0.89 (0.57, 1.37)    | 0.59   | 1.64 (0.38, 1.05)     | 0.08   |
| $\geq 65$              | 2.84 (1.15, 7.05)    | 0.024  | 0.35 (0.19, 0.65)    | 0.001  | 0.33 (0.12, 0.88)     | 0.03   |
| <b>Education</b>       |                      |        |                      |        |                       |        |
| Primary school or less | reference            |        | reference            |        | reference             |        |
| Middle school          | 0.94 (0.58, 1.52)    | 0.79   | 0.83 (0.59, 1.17)    | 0.31   | 0.58 (0.39, 0.84)     | <0.001 |
| High school/diploma    | 0.44 (0.27, 0.72)    | 0.001  | 0.61 (0.38, 0.97)    | 0.04   | 0.68 (0.37, 1.26)     | 0.22   |

|                        |                   |      |                   |      |                   |      |
|------------------------|-------------------|------|-------------------|------|-------------------|------|
| University             | 0.52 (0.29, 0.92) | 0.02 | 0.61 (0.41, 0.91) | 0.02 | 0.57 (0.35, 0.93) | 0.03 |
| <b>Marital Status</b>  |                   |      |                   |      |                   |      |
| Not Married            | reference         |      | reference         |      | reference         |      |
| Married                | 0.61 (0.36, 1.02) | 0.06 | 1.18 (0.83, 1.67) | 0.35 | 1.12 (0.69, 1.80) | 0.64 |
| <b>Monthly Income*</b> |                   |      |                   |      |                   |      |
| Quartile 1             | reference         |      | reference         |      | reference         |      |
| Quartile 2             | 1.09 (0.60, 2.01) | 0.77 | 1.42 (1.00, 2.03) | 0.05 | 0.83 (0.54, 1.26) | 0.37 |
| Quartile 3             | 1.06 (0.56, 2.00) | 0.87 | 1.46 (0.99, 2.15) | 0.06 | 1.17 (0.71, 1.93) | 0.54 |
| Quartile 4             | 1.61 (0.76, 3.40) | 0.21 | 1.68 (1.05, 2.69) | 0.03 | 0.62 (0.36, 1.06) | 0.08 |
| No income              | 1.54 (0.44, 5.40) | 0.50 | 0.98 (0.41, 2.36) | 0.96 | 0.37 (0.12, 1.21) | 0.10 |

\*Income quartile levels: **Lebanon:** [1] <\$529.88; [2] \$529.88 - < \$993.53; [3] \$993.53 - < \$1,987.05; [4] ≥ \$1,987.05. **Jordan:** [1] < \$423.13; [2] \$423.13 = < \$705.22; [3] \$705.22 - < \$1,269.39. **Palestine:** [1] < \$610.04; \$610.04 - < \$1,067.57; [3] \$1,067.57 - < \$1,525.10; [4] ≥ 1,525.10.

### Factors associated with current waterpipe tobacco smoking

Table 5 presents the results of multivariable analysis of factors associated with current waterpipe tobacco smoking by country and the adjusted odds ratio. In Lebanon, males were less likely than females to be current waterpipe smokers (OR: 0.49; 95% CI: 0.37, 0.64). In addition, adults older than 18-29 years old were less likely to be current waterpipe smokers: (OR: 0.30; 95% CI: 0.18, 0.49) among 30-49 years old, (OR: 0.08; 95% CI: 0.04, 0.15) among 50-64 years old, and (OR: 0.03; 95% CI: 0.01, 0.14). Compared to adults with a primary school education or less, adults with a high school education were more likely to be waterpipe smokers (OR: 1.87; 95% CI: 1.05, 3.34). Compared with adults in the lowest income quartile, those in the second (OR: 2.50; 95% CI: 1.19, 5.26) and third (OR: 2.45; 95% CI: 1.13, 5.30) quartiles were more likely to be current waterpipe smokers.

In Jordan, males were more likely than females to be current waterpipe smokers (OR: 1.92; 95% CI: 1.40, 2.62). Compared with adults 18-29 years old, older adults were less likely to be waterpipe smokers: (OR: 0.66; 95% CI: 0.44, 0.99) among those 30-49 years old, (OR: 0.45; 95% CI: 0.27, 0.75) among those 50-64 years old, and (OR: 0.07; 95% CI: 0.02, 0.31) among those ≥65 years old.

Similarly, in Palestine, males were more likely than females to be current waterpipe smokers (OR: 2.69; 95% CI: 1.85, 3.92). Compared with adults 18-29 years old, older adults were less likely to be waterpipe smokers: (OR: 0.48; 95% CI: 0.30, 0.77) among adults 30-49 years old, (OR: 0.19; 95% CI: 0.09, 0.35) among adults 50-64 years old, and (OR: 0.19; 95% CI: 0.05, 0.77) among adults ≥65 years old.

Table 5. Multivariable analysis of factors associated with current waterpipe smoking among adults by country in 2019

| Variable | Lebanon              |   | Jordan               |   | Palestine            |   |
|----------|----------------------|---|----------------------|---|----------------------|---|
|          | Adjusted OR (95% CI) | p | Adjusted OR (95% CI) | p | Adjusted OR (95% CI) | p |
| Gender   |                      |   |                      |   |                      |   |



|                        |                   |        |                   |        |                   |        |
|------------------------|-------------------|--------|-------------------|--------|-------------------|--------|
| Female                 | reference         |        | reference         |        | reference         |        |
| Male                   | 0.49 (0.37, 0.64) | <0.001 | 1.92 (1.40, 2.62) | <0.001 | 2.69 (1.85, 3.92) | <0.001 |
| <b>Age, in years</b>   |                   |        |                   |        |                   |        |
| 18 – 29                | reference         |        | reference         |        | reference         |        |
| 30 – 49                | 0.30 (0.18, 0.49) | <0.001 | 0.66 (0.44, 0.99) | 0.04   | 0.48 (0.30, 0.77) | 0.002  |
| 50 – 64                | 0.08 (0.04, 0.15) | <0.001 | 0.45 (0.27, 0.75) | 0.02   | 0.19 (0.09, 0.35) | <0.001 |
| ≥65                    | 0.03 (0.01, 0.14) | <0.001 | 0.07 (0.02, 0.31) | <0.001 | 0.19 (0.05, 0.77) | 0.02   |
| <b>Education</b>       |                   |        |                   |        |                   |        |
| Primary school or less | reference         |        | reference         |        | reference         |        |
| Middle school          | 1.03 (0.58, 1.86) | 0.91   | 1.34 (0.87, 2.08) | 0.18   | 1.37 (0.90, 2.10) | 0.14   |
| High school/diploma    | 1.87 (1.05, 3.34) | 0.03   | 1.14 (0.64, 2.02) | 0.65   | 1.72 (0.84, 3.51) | 0.14   |
| University             | 1.90 (0.98, 3.69) | 0.06   | 1.19 (0.73, 1.95) | 0.47   | 1.26 (0.75, 2.13) | 0.39   |
| <b>Marital Status</b>  |                   |        |                   |        |                   |        |
| Not Married            | reference         |        | reference         |        | reference         |        |
| Married                | 1.54 (0.91, 2.63) | 0.11   | 1.06 (0.71, 1.58) | 0.76   | 0.66 (0.41, 1.06) | 0.08   |
| <b>Monthly Income*</b> |                   |        |                   |        |                   |        |
| Quartile 1             | reference         |        | reference         |        | reference         |        |
| Quartile 2             | 2.50 (1.19, 5.26) | 0.02   | 0.75 (0.49, 1.14) | 0.18   | 0.71 (0.43, 1.18) | 0.18   |
| Quartile 3             | 2.45 (1.13, 5.30) | 0.02   | 1.05 (0.67, 1.66) | 0.82   | 0.89 (0.49, 1.61) | 0.50   |
| Quartile 4             | 1.93 (0.79, 4.74) | 0.15   | 1.44 (0.87, 2.37) | 0.16   | 1.20 (0.66, 2.20) | 0.66   |
| No income              | 1.27 (0.28, 5.84) | 0.76   | 1.01 (0.37, 2.75) | 0.98   | 0.72 (0.22, 2.37) | 0.22   |

\*Income quartile levels: **Lebanon:** [1] <\$529.88; [2] \$529.88 - < \$993.53; [3] \$993.53 - < \$1,987.05; [4] ≥ \$1,987.05. **Jordan:** [1] < \$423.13; [2] \$423.13 = < \$705.22; [3] \$705.22 - < \$1,269.39. **Palestine:** [1] < \$610.04; [2] \$610.04 - < \$1,067.57; [3] \$1,067.57 - < \$1,525.10; [4] ≥ 1,525.10.

## DISCUSSION

This study provides contemporary estimates of the prevalence and patterns of cigarette and waterpipe smoking among adults in Lebanon, Jordan and Palestine using nationally representative surveys. Findings from the study raise renewed concerns over tobacco use in these countries, which have some of the highest smoking prevalence rates globally: more than two in three adults in Lebanon are current smokers of combustible tobacco products, and almost two-thirds of adult males in Jordan and Palestine are also current smokers. Generally, males were more likely to be current smokers than females. However, almost half of adult females were current waterpipe smokers in Lebanon, exceeding by 40% the prevalence among adult males in that country.

Our study showed comparable results to previously reported prevalence estimates of current cigarette smoking in Lebanon. We report slightly higher estimates for males and females compared to the most recent published estimates where the rates of current cigarette smoking for males and females was 34% and 19%, respectively[2]. As for waterpipe tobacco smoking, our study reports a higher prevalence particularly among females when compared to the latest reported rate of 24.3%[16]. This may be partially explained by the fact that waterpipe smoking is

1  
2  
3 increasingly becoming a socially normative behavior and remains poorly unregulated, widely  
4 available and affordable in Lebanon[21].

5 In Jordan, our prevalence estimate of current smoking of any tobacco products among men  
6 (50.1%) was lower than the previously reported rate (65.3%) in the STEP 2019. Among  
7 Jordanian women, our estimate (15.9%) was consistent with the STEP 2019 estimate (16.4%).  
8 [17]. In Palestine, adult prevalence estimates of cigarette smoking among males were markedly  
9 higher than previously reported estimates of 49.7%, while for females it was relatively similar,  
10 3.5%[18]. We compare here our findings with previously reported prevalence rates in the three  
11 countries, bearing in mind that the methodologies of cited studies might not be comparable[2,  
12 16-18, 21].  
13  
14  
15

16 The gender- and age-specific prevalence rates of cigarette and waterpipe tobacco smoking are  
17 generally consistent with previous findings in the three countries[3]. Females in Lebanon had the  
18 highest prevalence of waterpipe smoking whereas males in Palestine had the highest prevalence  
19 of cigarette smoking across the three countries. Young adults across all three countries were  
20 more likely to smoke waterpipe tobacco in line with previous reports that waterpipe smoking has  
21 become widespread among young adults which is also consistent with reported global trends[4,  
22 14, 22, 23]. This may be attributable to the fact that waterpipe smoking is widely perceived to be  
23 less harmful than cigarette smoking among young people[6].  
24  
25

26 Patterns of smoking were different among current cigarette smokers across the three countries.  
27 More than one-third of males and females in Lebanon were light smokers, averaging less than  
28 ten cigarettes per day. In contrast, only 3.4% of males and 18.0% of females who were current  
29 cigarette smokers in Jordan were light smokers. Similarly, in Palestine, 9.4% of males and 23.1%  
30 of females were light smokers. These patterns, combined with the high overall prevalence rates  
31 of cigarette smoking, may be suggestive that for a significant proportion of smokers, cigarette  
32 smoking may be regarded more as a social behavior, especially in Lebanon. Alternatively, almost  
33 all male smokers in Jordan were heavy smokers, suggesting higher levels of addiction, with  
34 relevant implications for improving the use of existing smoking cessation services in Jordan.  
35 [22].  
36  
37  
38

39 Finally, it is important to highlight that across all three countries, the overwhelmingly majority of  
40 current waterpipe smokers use flavored tobacco, as previously reported in other countries in the  
41 EMR. In a study by Hamadeh et al (2021), out of the 2470 students that participated in the study  
42 from Egypt, Jordan, Palestine and the United Arab Emirates, the majority of male and female  
43 students smoked flavored waterpipe tobacco[24]. This was also observed in Iran where 56% of  
44 smokers used flavored waterpipe tobacco[25]. This pattern may be attributed to increased  
45 availability of flavored tobacco products, affordability, their unregulated marketing, as well as  
46 poor and often misleading labeling [5] calling for the need to consider banning of flavoring in  
47 tobacco as a potentially strong regulatory measure[26].  
48  
49

50 Strengths of this study include the fact that it reports contemporary estimates of smoking  
51 prevalence using large, nationally representative surveys, that have been consistently lacking in  
52 previous studies. The study used standardized questionnaires across the three countries, allowing  
53 for valid cross-country comparisons. Study limitations include the fact that tobacco use was self-  
54 reported and not biochemically verified, which may underreport prevalence. In addition, only a  
55  
56  
57  
58  
59  
60

1  
2  
3 small number of females reported current smoking in Jordan and Palestine. These small sample  
4 sizes may have resulted in unreliable estimates of the detailed patterns of cigarette and waterpipe  
5 smoking reported for females in the two countries. The study also did not report on use of other  
6 alternative smoking products such as electronic cigarettes[17, 27], heated tobacco, and midwakh  
7 [28, 29], which are increasingly more available in the loosely regulated markets of those  
8 countries.  
9

## 10 11 **CONCLUSION**

12 The prevalence of tobacco smoking is alarmingly high in Lebanon, Jordan, and Palestine. The  
13 age standardized prevalence rates of current cigarette and waterpipe smoking were 27.8% and  
14 38.1% in Lebanon, 25.5% and 12.0% in Jordan, and 26.3% and 14.1% in Palestine. These high  
15 estimates highlight the immediate need to strengthen existing tobacco control policies, especially  
16 those that address waterpipe tobacco smoking. Regulations should address waterpipe tobacco  
17 smoking in relation to all articles of the FCTC and should also be informed by the body of  
18 research in Lebanon, Jordan, and Palestine evaluating waterpipe specific interventions. This  
19 should be coupled with regular monitoring of tobacco trends using surveillance data such as the  
20 ones reported in this study in order to evaluate progress at national level. Findings from this  
21 research provide policy makers with evidence that can support them in calling for improved  
22 policies and measures to curb tobacco use.  
23  
24  
25

## 26 **Contributors**

27 YK led the study design. RN, YK, and NAR monitored data collection. YK, MJ and AC were  
28 responsible for data analysis. RN, RA, and RS wrote the first draft. YK, AC, NAR, MJ, AM, and  
29 JL contributed to successive drafts. All authors approved the final manuscript.  
30  
31

## 32 **Funding**

33 This study was funded by the International Development Research Centre (Grant number  
34 108821).  
35  
36

## 37 **Disclaimer**

38 The funding agency played no role in study design, in the collection, analysis and interpretation  
39 of data, in the writing of the report and in the decision to submit the article for publication. The  
40 content is solely the responsibility of the authors and does not necessarily represent the official  
41 views of the funding agency.  
42  
43

## 44 **Ethics approval**

45 This study involves human participants and was approved by the Institutional Board at the  
46 American University of Beirut, ID: SBS-2019-0097.  
47

## 48 **Conflict of Interests**

49 None declared.  
50

## 51 **Data Availability Statement**

52 Data are available upon reasonable request.  
53  
54

## 55 **REFERENCES**

56  
57  
58  
59  
60

1. WHO. WHO REPORT ON THE GLOBAL TOBACCO EPIDEMIC, 2021: Addressing new and emerging products. 2021.
2. WHO. WHO global report on trends in prevalence of tobacco smoking 2000-2025: World Health Organization; 2018.
3. Maziak W, Nakkash R, Bahelah R, Hussein A, Fanous N, Eissenberg T. Tobacco in the Arab world: old and new epidemics amidst policy paralysis. *Health Policy Plan.* 2014;29(6):784-94.
4. Akl EA, Gunukula SK, Aleem S, Obeid R, Jaoude PA, Honeine R, et al. The prevalence of waterpipe tobacco smoking among the general and specific populations: a systematic review. *BMC Public Health.* 2011;11:244.
5. Maziak W, Taleb ZB, Bahelah R, Islam F, Jaber R, Auf R, et al. The global epidemiology of waterpipe smoking. *Tob Control.* 2015;24 Suppl 1:i3-i12.
6. Akl EA, Ward KD, Bteddini D, Khaliel R, Alexander AC, Lotfi T, et al. The allure of the waterpipe: a narrative review of factors affecting the epidemic rise in waterpipe smoking among young persons globally. *Tob Control.* 2015;24 Suppl 1:i13-i21.
7. Salloum RG, Nakkash R, Abu-Rmeileh NME, Hamadeh RR, Darawad MW, Kheirallah KA, et al. Individual-level determinants of waterpipe smoking demand in four Eastern-Mediterranean countries. *Health Promot Int.* 2019;34(6):1157-66.
8. WHO. WHO report on the global tobacco epidemic, 2008: the MPOWER package. Geneva, Switzerland: World Health Organization; 2008.
9. WHO. Global Adult Tobacco Survey: Egypt Country Report 2009. 2009.
10. WHO. Global Adult Tobacco Survey: Qatar Country Report 2013. 2013.
11. WHO. Global Adult Tobacco Survey: Pakistan Country Report 2014. 2014.
12. Jawad M, Lee JT, Millett C. Waterpipe Tobacco Smoking Prevalence and Correlates in 25 Eastern Mediterranean and Eastern European Countries: Cross-Sectional Analysis of the Global Youth Tobacco Survey. *Nicotine Tob Res.* 2016;18(4):395-402.
13. Salloum RG, Lee J, Mostafa A, Abu-Rmeileh NME, Hamadeh RR, Darawad MW, et al. Waterpipe Tobacco Smoking among University Students in Three Eastern Mediterranean Countries: Patterns, Place, and Price. *Subst Use Misuse.* 2019;54(14):2275-83.
14. Hamadeh RR, Lee J, Abu-Rmeileh NME, Darawad M, Mostafa A, Kheirallah KA, et al. Gender differences in waterpipe tobacco smoking among university students in four Eastern Mediterranean countries. *Tob Induc Dis.* 2020;18:100.
15. Merrill RM, Madanat H, Kelley AT. Smoking prevalence, attitudes, and perceived smoking prevention and control responsibilities and practices among nurses in Amman, Jordan. *Int J Nurs Pract.* 2010;16(6):624-32.
16. Sibai A, Tohme R, Mahfoud Z, Chaaya M, Hwalla N. Non-communicable diseases and behavioral risk factor survey: comparison of estimates based on cell phone interviews with face to face interviews. WHO Lebanon office Beirut, Lebanon: Final report submitted to World Health Organization-Lebanon office. 2009.
17. MoH. Jordan National Stepwise (STEPS) Survey for Non-communicable Disease Risk Factors. Jordan 2019
18. Palestinian Bureau of Statistics. Palestinian Family Survey 2010. Monitoring the Situation of Children and Women. UNICEF, UNFPA. 2013.

19. Abdulrahim S, Jawad M. Socioeconomic differences in smoking in Jordan, Lebanon, Syria, and Palestine: A cross-sectional analysis of national surveys. *PLoS One*. 2018;13(1):e0189829.
20. Ahmad OB, Boschi-Pinto C, Lopez AD, Murray CJ, Lozano R, Inoue M. Age standardization of rates: a new WHO standard. Geneva: World Health Organization. 2001;9(10).
21. Daou KN, Bou-Orm IR, Adib SM. Factors associated with waterpipe tobacco smoking among Lebanese women. *Women Health*. 2018;58(10):1124-34.
22. Jaghbir M, Shareif, S. & Ahram, M. Quitting smoking and utilization of smoking cessation services in Jordan: a population-based survey. *EMHJ-Eastern Mediterranean Health Journal*, 20 (9): 538 - 546. 2014.
23. Khattab A, Javaid A, Iraqi G, Alzaabi A, Ben Kheder A, Koniski ML, et al. Smoking habits in the Middle East and North Africa: results of the BREATHE study. *Respir Med*. 2012;106 Suppl 2:S16-24.
24. Hamadeh RR, Borgan SM, Khabisa J, Sibai AM. Tobacco Research in the Eastern Mediterranean Region: A Scoping Review of Published Studies from Seven Countries. *Journal of Community Health*. 2021;46(1):225-31.
25. Ebrahimi Kalan M, Abazari M, Ben Taleb Z, Adham D, Abbasi A, Bursac Z, et al. Characteristics of flavored and non-flavored waterpipe tobacco users: a real-world setting study. *Environ Sci Pollut Res Int*. 2021;28(41):57629-39.
26. Yang Y, Lindblom E, Salloum R, Ward K. The impact of a comprehensive tobacco product flavor ban in San Francisco among young adults. *Addict Behav Rep*. 2020;11:100273-.
27. Aghar H, El-Khoury N, Reda M, Hamadeh W, Krayem H, Mansour M, et al. Knowledge and attitudes towards E-cigarette use in Lebanon and their associated factors. *BMC Public Health*. 2020;20:1-18.
28. Nakkash RT, El Boukhari N, Afifi RA. 'When I smoked it, it was like a slap in the face but it felt really good': exploring determinants of midwakh use among young adults in Lebanon. *Tobacco Control*. 2021;30(3):351-5.
29. Afifi R, Saravanan M, El Salibi N, Nakkash R, Rady A, Sherman S, et al. Evidence from the Lebanon Global School-based Student Health Survey on midwakh tobacco smoking in school students: a harbinger of the next global tobacco pandemic? *Eastern Mediterranean Health Journal*. 2020;26(1):116-21.

1  
2  
3  
4  
5  
6  
7  
8  
9  
10  
11  
12  
13  
14  
15  
16  
17  
18  
19  
20  
21  
22  
23  
24  
25  
26  
27  
28  
29  
30  
31  
32  
33  
34  
35  
36  
37  
38  
39  
40  
41  
42  
43  
44  
45  
46  
47  
48  
49  
50  
51  
52  
53  
54  
55  
56  
57  
58  
59  
60

For peer review only

**HOUSEHOLD QUESTIONNAIRE**  
*Survey on the Economics of Waterpipe Smoking in Lebanon*

| HOUSEHOLD INFORMATION PANEL                                                     |                                                                                                                                                                                                                      |
|---------------------------------------------------------------------------------|----------------------------------------------------------------------------------------------------------------------------------------------------------------------------------------------------------------------|
| <b>HH1.</b> Cluster number:                    ___ ___ ___                      | <b>HH2.</b> Household number:                    ___ ___                                                                                                                                                             |
| <b>HH3.</b> Interviewer's name:<br>Name _____<br>ID number: ___ ___             | <b>HH4.</b> Supervisor's name:<br>Name _____                                                                                                                                                                         |
| <b>HH5.</b> Day / Month / Year of interview:<br>___ ___ / ___ ___ / ___ ___ ___ | <b>HH6B. Governorate:</b><br>BEIRUT: ..... [1]<br>MOUNT LEBANON: ..... [2]<br>NORTH: ..... [3]<br>AKKAR: ..... [4]<br>BEKAA: ..... [5]<br>SOUTH: ..... [6]<br>EL NABATIEH: ..... [7]<br>BAALBEK-EL HERMEL: ..... [8] |
| <b>HH6A.</b> LOCALITY NAME: _____                                               |                                                                                                                                                                                                                      |
| <b>HH7.</b> Respondent number: ___ ___ ___                                      |                                                                                                                                                                                                                      |

Peer review only

1  
2  
3  
4  
5  
6  
7  
8  
9  
10  
11  
12  
13  
14  
15  
16  
17  
18  
19  
20  
21  
22  
23  
24  
25  
26  
27  
28  
29  
30  
31  
32  
33  
34  
35  
36  
37  
38  
39  
40  
41  
42  
43  
44  
45  
46  
47  
48  
49  
50  
51  
52  
53  
54  
55  
56  
57  
58  
59  
60

1  
2  
3  
4  
5  
6  
7  
8  
9  
10  
11  
12  
13  
14  
15  
16  
17  
18  
19  
20  
21  
22  
23  
24  
25  
26  
27  
28  
29  
30  
31  
32  
33  
34  
35  
36  
37  
38  
39  
40  
41  
42  
43  
44  
45  
46  
47  
48  
49  
50  
51  
52  
53  
54  
55  
56  
57  
58  
59  
60

| <b>SECTION A: BACKGROUND CHARACTERISTICS</b>                      |                                                                                                                                                                                                                                                                                                                                                                                                                                             |
|-------------------------------------------------------------------|---------------------------------------------------------------------------------------------------------------------------------------------------------------------------------------------------------------------------------------------------------------------------------------------------------------------------------------------------------------------------------------------------------------------------------------------|
| <b>A1.</b> Gender                                                 | <p><i>Interviewer: State gender at sight.</i></p> <p>Male.....[] 1<br/>Female.....[] 2</p>                                                                                                                                                                                                                                                                                                                                                  |
| <b>A2.</b> What is your age?                                      | <p>___ ___ ___ Years</p> <p><i>If the respondent is not sure, the respondent will estimate the age</i></p> <p><i>Interviewer: round to the nearest integer if necessary.</i></p>                                                                                                                                                                                                                                                            |
| <b>A3.</b> What is your marital status?                           | <p>Single.....[] 1<br/>Engaged.....[] 2<br/>Married.....[] 3<br/>Separated.....[] 4<br/>Divorced.....[] 5<br/>Widow(er).....[] 6<br/>No response.....[] 777</p>                                                                                                                                                                                                                                                                             |
| <b>A4.</b> What is the highest education level you have obtained? | <p><i>Interviewer: participant can choose one item only:</i></p> <p>No formal education.....[] 1<br/>Completed primary school.....[] 2<br/>Completed middle school.....[] 3<br/>Completed high school/equivalent education.....[] 4<br/>Completed 1-2-year post-secondary/vocational.....[] 5<br/>Completed university/college.....[] 6<br/>Completed postgraduate degree.....[] 7<br/>Don't know.....[] 999<br/>No response.....[] 777</p> |



|                                                                                                                                                                                                                                                                                                                                                                                             |                                                                                                                                                                                                                                                                                                                                                                                                                                                                                                            |
|---------------------------------------------------------------------------------------------------------------------------------------------------------------------------------------------------------------------------------------------------------------------------------------------------------------------------------------------------------------------------------------------|------------------------------------------------------------------------------------------------------------------------------------------------------------------------------------------------------------------------------------------------------------------------------------------------------------------------------------------------------------------------------------------------------------------------------------------------------------------------------------------------------------|
| <p>1<br/>2<br/>3<br/>4<br/>5<br/>6<br/>7<br/>8<br/>9<br/>10<br/>11<br/>12</p> <p><b>A5.</b> What is your nationality?</p>                                                                                                                                                                                                                                                                   | <p><i>Interviewer: participant can choose more than one nationality</i></p> <p>Lebanese .....[] 1</p> <p>Syrian .....[]2</p> <p>Palestinian .....[]3</p> <p>Other: _____ ,... []4</p>                                                                                                                                                                                                                                                                                                                      |
| <p>13<br/>14<br/>15<br/>16<br/>17<br/>18<br/>19<br/>20<br/>21<br/>22<br/>23<br/>24<br/>25<br/>26<br/>27<br/>28<br/>29<br/>30<br/>31<br/>32<br/>33<br/>34<br/>35<br/>36<br/>37</p> <p><b>A6.</b> Which of the following best describe your employment status?</p>                                                                                                                            | <p><i>Interviewer: Participant can choose all that apply</i></p> <p>Full-time employed in the workforce (including self-employed).....[] 1</p> <p>Part-time employed in the workforce (including self-employed).....[] 2</p> <p>Unemployed.....[] 3</p> <p>Retired or on a pension.....[] 4</p> <p>Full-time student.....[] 5</p> <p>Part-time student.....[] 6</p> <p>Housewife/ Home duties.....[] 7</p> <p>Other (specify)_____.....[] 8</p> <p>Don't know.....[] 999</p> <p>No response.....[] 777</p> |
| <p>38<br/>39<br/>40<br/>41<br/>42<br/>43<br/>44<br/>45<br/>46<br/>47<br/>48<br/>49<br/>50<br/>51</p> <p><b>A7.</b> What is the best estimate of your <b>monthly household income</b>, that is, total income before taxes, or gross income, of all persons in your household combined. We ask this for statistical purposes. We assure your responses will remain strictly confidential.</p> | <p>Less than 800,000 L.L .....[] 1</p> <p>From 800,000 L.L to less than 1,500,000 L.L....[] 2</p> <p>From 1,500,000L.L to less than 3,000,000L.L ..[] 3</p> <p>3,000,000 L.L and more.....[] 4</p> <p>Don't know.....[] 999</p> <p>No response.....[] 777</p>                                                                                                                                                                                                                                              |
| <p>52<br/>53<br/>54<br/>55<br/>56<br/>57<br/>58<br/>59<br/>60</p> <p><b>A8.</b> What is the best estimate of your <b>monthly individual income</b>, that is, your total income before taxes, or gross income. We ask this for statistical purposes. We assure your responses will remain strictly confidential.</p>                                                                         | <p>Less than 800,000 L.L .....[] 1</p> <p>From 800,000 L.L to less than 1,500,000 L.L....[] 2</p> <p>From 1,500,000L.L to less than 3,000,000L.L ..[] 3</p> <p>3,000,000 L.L and more.....[] 4</p> <p>No income .....[]5</p> <p>Don't know.....[] 999</p>                                                                                                                                                                                                                                                  |

|                                                                                                                                                                             |                                                                                                                                                                                                                                                            |
|-----------------------------------------------------------------------------------------------------------------------------------------------------------------------------|------------------------------------------------------------------------------------------------------------------------------------------------------------------------------------------------------------------------------------------------------------|
|                                                                                                                                                                             | No response.....[] 777                                                                                                                                                                                                                                     |
| <b>A9.</b> In the last month, did you or anyone else in the household had to borrow money to pay any important bills on time, such as electricity, telephone or rent bills? | Yes.....[] 1<br>No.....[] 2<br>Don't know.....[] 999<br>No response.....[] 777                                                                                                                                                                             |
| <b>A10.</b> Who usually makes the decisions regarding the daily household purchases?<br>Daily household purchases include grocery or daily essentials etc..                 | Nobody .....[]1<br>Respondent alone .....[]2<br>Respondent and spouse/partner .....[]3<br>Respondent and other person .....[]4<br>Spouse /partner alone .....[]5<br>Someone else. Specify:_____.....[]6<br>Don't know.....[] 999<br>No response.....[] 777 |
| <b>A11.</b> Who usually makes the decisions regarding the large household purchases?<br>Large household purchases include furniture or a car etc...                         | Nobody .....[]1<br>Respondent alone .....[]2<br>Respondent and spouse/partner .....[]3<br>Respondent and other person .....[]4<br>Spouse/partner alone .....[]5<br>Someone else. Specify:_____.....[]6<br>Don't know.....[] 999<br>No response.....[] 777  |

**SECTION B: TOBACCO SMOKING**

**Tobacco Products**

**B1.** Do you currently use any tobacco products (cigarettes, arguileh, other tobacco products)?

Yes .....[]1

No .....[]2

**If answer is “no”, skip question B2-B35**

**B2.** On average, how many of the following products do you **currently** smoke each (day/week/month)? (One option)

*Interviewer: if respondent reports smoking the product but not every (day/week/month), enter 888*

**Regular Cigarettes?**

\_\_\_ \_\_\_ \_\_\_ per day

\_\_\_ \_\_\_ \_\_\_ per week

\_\_\_ \_\_\_ \_\_\_ per month

**Number of arguileh sessions at home or someone else’s home?**

\_\_\_ \_\_\_ \_\_\_ per day

\_\_\_ \_\_\_ \_\_\_ per week

\_\_\_ \_\_\_ \_\_\_ per month

**Number of arguileh sessions in a café or restaurant?**

\_\_\_ \_\_\_ \_\_\_ per day

\_\_\_ \_\_\_ \_\_\_ per week

\_\_\_ \_\_\_ \_\_\_ per month

**Do you smoke any other tobacco products?**

Yes .....[]1

No .....[]2

If yes, specify:

|                 | <b>Every day</b> | <b>Some days</b> | <b>Not at all</b> |
|-----------------|------------------|------------------|-------------------|
| E-cigarettes    |                  |                  |                   |
| Cigars          |                  |                  |                   |
| Chewing Tobacco |                  |                  |                   |

|                                   | Midwakh/ Dokha                                                                             |                                                                                                                                                                                                                                                                                                                                                                                                  |                    |             |                     |                    |                   |             |  |  |                                   |                                                 |  |  |  |  |
|-----------------------------------|--------------------------------------------------------------------------------------------|--------------------------------------------------------------------------------------------------------------------------------------------------------------------------------------------------------------------------------------------------------------------------------------------------------------------------------------------------------------------------------------------------|--------------------|-------------|---------------------|--------------------|-------------------|-------------|--|--|-----------------------------------|-------------------------------------------------|--|--|--|--|
|                                   | Roll your own<br>cigarettes                                                                |                                                                                                                                                                                                                                                                                                                                                                                                  |                    |             |                     |                    |                   |             |  |  |                                   |                                                 |  |  |  |  |
|                                   | Other. Specify<br>_____                                                                    |                                                                                                                                                                                                                                                                                                                                                                                                  |                    |             |                     |                    |                   |             |  |  |                                   |                                                 |  |  |  |  |
| <b>B3.</b>                        | Are you aware of an increase in the price of tobacco products recently?                    | Yes ..... <input type="checkbox"/> 1<br>No ..... <input type="checkbox"/> 2<br>Specify:<br>Cigarettes<br>Waterpipe tobacco<br>Both                                                                                                                                                                                                                                                               |                    |             |                     |                    |                   |             |  |  |                                   |                                                 |  |  |  |  |
| <b>B4.</b>                        | If yes, please report the before and after price of the products that you usually purchase | <table border="1"> <thead> <tr> <th><i>Product</i></th> <th><i>Unit</i></th> <th><i>Price Before</i></th> <th><i>Price After</i></th> </tr> </thead> <tbody> <tr> <td><i>Cigarettes</i></td> <td><i>Pack</i></td> <td></td> <td></td> </tr> <tr> <td><i>Waterpipe tobacco products</i></td> <td><i>Select unit: 50 g, 100g, 250g, 500g, 1kg</i></td> <td></td> <td></td> </tr> </tbody> </table> | <i>Product</i>     | <i>Unit</i> | <i>Price Before</i> | <i>Price After</i> | <i>Cigarettes</i> | <i>Pack</i> |  |  | <i>Waterpipe tobacco products</i> | <i>Select unit: 50 g, 100g, 250g, 500g, 1kg</i> |  |  |  |  |
| <i>Product</i>                    | <i>Unit</i>                                                                                | <i>Price Before</i>                                                                                                                                                                                                                                                                                                                                                                              | <i>Price After</i> |             |                     |                    |                   |             |  |  |                                   |                                                 |  |  |  |  |
| <i>Cigarettes</i>                 | <i>Pack</i>                                                                                |                                                                                                                                                                                                                                                                                                                                                                                                  |                    |             |                     |                    |                   |             |  |  |                                   |                                                 |  |  |  |  |
| <i>Waterpipe tobacco products</i> | <i>Select unit: 50 g, 100g, 250g, 500g, 1kg</i>                                            |                                                                                                                                                                                                                                                                                                                                                                                                  |                    |             |                     |                    |                   |             |  |  |                                   |                                                 |  |  |  |  |
| <b>B5.</b>                        | Did the price change affect your purchase patterns?                                        | Yes ..... <input type="checkbox"/> 1<br>No ..... <input type="checkbox"/> 2                                                                                                                                                                                                                                                                                                                      |                    |             |                     |                    |                   |             |  |  |                                   |                                                 |  |  |  |  |
| <b>B6.</b>                        | If yes, did it:                                                                            | Increase your purchase patterns ..... <input type="checkbox"/> 1<br>Decrease your purchase patterns ..... <input type="checkbox"/> 2                                                                                                                                                                                                                                                             |                    |             |                     |                    |                   |             |  |  |                                   |                                                 |  |  |  |  |
| <b>Regular Cigarettes</b>         |                                                                                            |                                                                                                                                                                                                                                                                                                                                                                                                  |                    |             |                     |                    |                   |             |  |  |                                   |                                                 |  |  |  |  |
| <b>B7.</b>                        | Have you smoked at least 100 cigarettes in your entire life?                               | Yes ..... <input type="checkbox"/> 1<br>No..... <input type="checkbox"/> 2<br>Don't know ..... <input type="checkbox"/> 999<br>No response ..... <input type="checkbox"/> 777<br><b>If answer is "no", skip question B4.</b>                                                                                                                                                                     |                    |             |                     |                    |                   |             |  |  |                                   |                                                 |  |  |  |  |

|                                                                                                                             |                                                                                                                                                                                                                                                                                                                                                                                                                                                                                                              |
|-----------------------------------------------------------------------------------------------------------------------------|--------------------------------------------------------------------------------------------------------------------------------------------------------------------------------------------------------------------------------------------------------------------------------------------------------------------------------------------------------------------------------------------------------------------------------------------------------------------------------------------------------------|
| <p><b>B8.</b> Do you <u>now</u> smoke cigarettes?</p>                                                                       | <p>Every day..... <input type="checkbox"/> 1<br/>                 Some days ..... <input type="checkbox"/> 2<br/>                 Not at all ..... <input type="checkbox"/> 3<br/>                 Don't know ..... <input type="checkbox"/> 999<br/>                 No response ..... <input type="checkbox"/> 777<br/> <b>If the answer is “every day” or “somedays”, skip question B5.</b></p>                                                                                                           |
| <p><b>B9.</b> Do you think you might smoke cigarettes, even once, over the next year?</p>                                   | <p>Definitely yes ..... <input type="checkbox"/>1<br/>                 Probably yes ..... <input type="checkbox"/>2<br/>                 Probably no ..... <input type="checkbox"/>3<br/>                 Definitely no ..... <input type="checkbox"/>4<br/> <b>If answer is “probably no” or definitely no”, skip questions B6 – B10</b></p>                                                                                                                                                                |
| <p><b>B10.</b> The last time you bought cigarettes for yourself, how many cigarette packs did you buy?</p>                  | <p><i>Interviewer: record number /check unit</i><br/>                 ___ ___ ___<br/>                 Packs..... <input type="checkbox"/> 2<br/>                 Carton..... <input type="checkbox"/> 3<br/>                 Other (specify): _____ ..... <input type="checkbox"/> 4<br/>                 Never bought cigarettes ..... <input type="checkbox"/> 5<br/>                 If answer is “never bought cigarettes”, skip questions B7-B10</p>                                                   |
| <p><b>B11.</b> In total, how much money did you pay for the last purchase?</p>                                              | <p><i>Interviewer: if participant doesn't know, enter 999</i><br/>                 ___ ___ ___ L.L.</p>                                                                                                                                                                                                                                                                                                                                                                                                      |
| <p><b>B12.</b> What was the cigarette pack brand name?</p>                                                                  | <p><i>Interviewer: record brand name</i><br/>                 _____</p>                                                                                                                                                                                                                                                                                                                                                                                                                                      |
| <p><b>B13.</b> Which of the following statements best describes your thinking about giving up <u>cigarette</u> smoking?</p> | <p>In the next 30 days ..... <input type="checkbox"/>1<br/>                 In the next 6 months ..... <input type="checkbox"/>2<br/>                 In the next year ..... <input type="checkbox"/>3<br/>                 More than one year from now ..... <input type="checkbox"/>4<br/>                 I don't want to quit ..... <input type="checkbox"/>5<br/>                 Don't know ..... <input type="checkbox"/> 999<br/>                 No response ..... <input type="checkbox"/> 777</p> |

|                                                                                                                                                                               |                                                                                                                                                                                                                                            |
|-------------------------------------------------------------------------------------------------------------------------------------------------------------------------------|--------------------------------------------------------------------------------------------------------------------------------------------------------------------------------------------------------------------------------------------|
| <p><b>B14.</b> In the past 12 months, have you stopped smoking cigarettes for one day or longer because you were trying to quit?</p>                                          | <p>Yes .....[]1<br/>         No .....[]2<br/>         Don't know .....[] 999<br/>         No response .....[] 777</p>                                                                                                                      |
| <b>Arguileh</b>                                                                                                                                                               |                                                                                                                                                                                                                                            |
| <p><b>B15.</b> Have you <u>ever</u> smoked tobacco in a arguileh even just a few puffs?</p>                                                                                   | <p>Yes .....[] 1<br/>         No.....[] 2<br/>         Don't know .....[] 999<br/>         No response .....[] 777<br/> <b>If answer is “no”, skip question B12</b></p>                                                                    |
| <p><b>B16.</b> Do you <u>now</u> smoke tobacco in a waterpipe?</p>                                                                                                            | <p>Every day.....[] 1<br/>         Some days .....[] 2<br/>         Not at all .....[] 3<br/>         Don't know .....[] 999<br/>         No response .....[] 777<br/> <b>If answer is “everyday” or “somedays” skip question B13.</b></p> |
| <p><b>B17.</b> Do you think you might smoke waterpipe, even once, over the next year?</p>                                                                                     | <p>Definitely yes ..... []1<br/>         Probably yes .....[]2<br/>         Probably not .....[]3<br/>         Definitely not .....[]4<br/> <b>If answer is “probably not” or “definitely not”, skip questions B14 - B35</b></p>           |
| <p><b>B18.</b> What flavor do you mostly prefer smoking?</p>                                                                                                                  | <p>Non-flavored .....[]1<br/>         Flavored. Insert flavor: _____ ....[]2</p>                                                                                                                                                           |
| <p><b>B19.</b> The last time you smoked arguileh at a café/restaurant, how many arguileh smoking heads/rocks did you have and how much did you pay for these heads/rocks?</p> | <p><i>Interviewer: record number and prices</i><br/>         Number: ___ ___ ___<br/>         Price: ___ ___ ___<br/> <b>If quantity is zero “0”, skip questions B16- B22</b></p>                                                          |

|                                                                                                                                                                                                              |                                                                                                                                                                                                                                                  |
|--------------------------------------------------------------------------------------------------------------------------------------------------------------------------------------------------------------|--------------------------------------------------------------------------------------------------------------------------------------------------------------------------------------------------------------------------------------------------|
| <p><b>B20.</b> The last time you smoked arguileh at a café/restaurant, how much did you pay?</p>                                                                                                             | <p><i>Interviewer: if participant doesn't know, enter 999</i></p> <p>Record Price:<br/>         ____ ____ ____ L.L.</p>                                                                                                                          |
| <p><b>B21.</b> How many heads/rocks did they offer you for free?</p>                                                                                                                                         | <p><i>Interviewer: Record number</i></p> <p>____ ____ ____</p> <p><i>Don't know .....[] 999</i></p> <p><i>No response .....[] 777</i></p>                                                                                                        |
| <p><b>B22.</b> Think of the last time you smoked arguileh at a café. Which of the following best describes the type of establishment?</p>                                                                    | <p>Café .....[]1</p> <p>Baladi/ Sha'bi Café .....[]2</p> <p>Internet café.....[]3</p> <p>Restaurant .....[]4</p> <p>Other _____ .....[]5</p>                                                                                                     |
| <p><b>B23.</b> Does the establishment typically serve women?</p>                                                                                                                                             | <p>Yes.....[] 1</p> <p>No .....[] 2</p> <p>Don't know .....[] 999</p> <p>No response .....[] 777</p>                                                                                                                                             |
| <p><b>B24.</b> Approximately one year ago, how many arguileh smoking heads/rocks did you smoke during a typical arguileh cafe visit each month and how much did you pay for these heads/rocks per month?</p> | <p><i>Interviewer: record number and prices if participant doesn't know the price, put 999</i></p> <p>Number: ____ ____ ____ per month</p> <p>Price: : ____ ____ ____ per month</p> <p>Don't know .....[] 999</p> <p>No response .....[] 777</p> |
| <p><b>B25.</b> Approximately one year ago, how much did you pay at a typical arguileh café visit each month?</p>                                                                                             | <p><i>Interviewer: Record price</i></p> <p>____ ____ ____ L.L. per month</p> <p>Don't know .....[] 999</p> <p>No response .....[] 777</p>                                                                                                        |
| <p><b>B26.</b> How many heads did they offer you for free?</p>                                                                                                                                               | <p><i>Interviewer: Record number</i></p> <p>____ ____ ____</p> <p><i>Don't know .....[] 999</i></p> <p><i>No response .....[] 777</i></p>                                                                                                        |

|                                                                                                                                       |                                                                                                                                                                                                                                                                                                                                                                                                                                                                                                                                               |
|---------------------------------------------------------------------------------------------------------------------------------------|-----------------------------------------------------------------------------------------------------------------------------------------------------------------------------------------------------------------------------------------------------------------------------------------------------------------------------------------------------------------------------------------------------------------------------------------------------------------------------------------------------------------------------------------------|
| <p><b>B27.</b> The last time you bought arguileh tobacco pack for yourself from the store, how much arguileh tobacco did you buy?</p> | <p><i>Interviewer: record number and check unit</i></p> <p>___ ___ ___ 50 gram packs.....[] 1</p> <p>___ ___ ___ 100 gram packs.....[] 2</p> <p>___ ___ ___ 250 gram packs.....[] 3</p> <p>___ ___ ___ 500 gram packs.....[] 4</p> <p>___ ___ ___ 1 kilogram packs.....[] 5</p> <p>___ ___ ___ Other pack - specify weight: __.[] 6</p> <p>___ ___ ___ Bulk - specify weight: ____...[] 7</p> <p>Never bought arguileh tobacco from store ....[]8</p> <p><b>If the answer is “Never bought arguileh tobacco” skip questions B24 – B27</b></p> |
| <p><b>B28.</b> In total, how much did you pay for the purchase of arguileh tobacco from the store?</p>                                | <p><i>Interviewer: if participant doesn't know, enter 999</i></p> <p>___ ___ ___ L.L.</p>                                                                                                                                                                                                                                                                                                                                                                                                                                                     |
| <p><b>B29.</b> What was the arguileh tobacco brand name?</p>                                                                          | <p><i>Interviewer: record brand name</i></p> <p>_____</p>                                                                                                                                                                                                                                                                                                                                                                                                                                                                                     |
| <p><b>B30.</b> Approximately one year ago, how much arguileh tobacco did you buy from the store each month?</p>                       | <p><i>Interviewer: record number and check unit</i></p> <p>___ ___ ___ 50 gram packs.....[] 1</p> <p>___ ___ ___ 100 gram packs.....[] 2</p> <p>___ ___ ___ 250 gram packs.....[] 3</p> <p>___ ___ ___ 500 gram packs.....[] 4</p> <p>___ ___ ___ 1 kilogram packs.....[] 5</p> <p>___ ___ ___ Other pack - specify weight: __.[] 6</p> <p>___ ___ ___ Bulk - specify weight: ____...[] 7</p> <p>Never bought arguileh tobacco.....[] 8</p> <p>Don't know .....[] 999</p> <p>No response .....[] 777</p>                                      |



|                                                                                                                                                                                                          |                                                                                                                                                                                                                                                                                                                                                                                                                                                                            |
|----------------------------------------------------------------------------------------------------------------------------------------------------------------------------------------------------------|----------------------------------------------------------------------------------------------------------------------------------------------------------------------------------------------------------------------------------------------------------------------------------------------------------------------------------------------------------------------------------------------------------------------------------------------------------------------------|
| <p><b>B31.</b> Approximately one year ago, how much did you spend on arguileh tobacco purchases from stores each month ?</p>                                                                             | <p><i>Interviewer: if participant doesn't know, enter 999</i></p> <p>____ _ L.L. per month</p> <p>Don't know .....[] 999</p> <p>No response .....[] 777</p>                                                                                                                                                                                                                                                                                                                |
| <p><b>B32.</b> The last time you used arguileh delivery service, how many arguileh smoking heads/rocks did you buy and how much did you pay for these heads/rocks?</p>                                   | <p><i>Interviewer: record number and prices, if participant doesn't know, enter 999</i></p> <p>Number: ____ _</p> <p>Price: ____ _</p> <p><b>if the quantity is zero "0", skip questions B29–B33</b></p>                                                                                                                                                                                                                                                                   |
| <p><b>B33.</b> The last time you used arguileh delivery service, how much did you pay?</p>                                                                                                               | <p><i>Interviewer: if participant doesn't know, enter 999</i></p> <p><i>Insert price:</i></p> <p>_____ L.L.</p>                                                                                                                                                                                                                                                                                                                                                            |
| <p><b>B34.</b> How many heads did they offer you for free?</p>                                                                                                                                           | <p><i>Interviewer: Record number</i></p> <p>_____</p> <p>Don't know .....[] 999</p> <p>No response .....[] 777</p>                                                                                                                                                                                                                                                                                                                                                         |
| <p><b>B35.</b> Approximately one year ago, how many arguileh smoking heads/rocks did you order using arguileh delivery services each month and how much did you pay for these heads/rocks per month?</p> | <p><i>Interviewer: In case the participant expressed difficulty, ask him how many arguileh's does he order per month and typically how many heads come with the arguileh and then multiply them. For example, if on average you smoke 20 arguileh's per month and it comes with 2 heads, then your total is 20x2=40.</i></p> <p><i>Record number and prices, if participant doesn't know, enter 999</i></p> <p>Number: ____ _ per month</p> <p>Price: ____ _ per month</p> |

|                                                                                                                                   |                                                                                                                                                                                                                           |
|-----------------------------------------------------------------------------------------------------------------------------------|---------------------------------------------------------------------------------------------------------------------------------------------------------------------------------------------------------------------------|
|                                                                                                                                   | Don't know .....[] 999<br>No response .....[] 777                                                                                                                                                                         |
| <b>B36.</b> Appro<br>ximately one year ago, how much did you<br>pay?                                                              | <i>Interviewer: Record price. If participant doesn't<br/>know, put 999.</i><br>____ _ L.L. per month<br>Don't know .....[] 999<br>No response .....[] 777                                                                 |
| <b>B37.</b> How many heads did they offer you for<br>free?                                                                        | <i>Interviewer: record number</i><br>____ _<br><i>Don't know .....[] 999</i><br><i>No response .....[] 777</i>                                                                                                            |
| <b>B38.</b> Which of the following statements best<br>describes your thinking about giving up<br><u>arguileh</u> smoking?         | In the next 30 days ..... []1<br>In the next 6 months .....[]2<br>In the next year .....[]3<br>More than one year from now .....[]4<br>I don't want to quit .....[]5<br>Don't know .....[] 999<br>No response .....[] 777 |
| <b>B39.</b> In the past 12 months, have you stopped<br>smoking arguileh for one day or longer<br>because you were trying to quit? | Yes .....[]1<br>No .....[]2<br>Don't know .....[] 999<br>No response .....[] 777                                                                                                                                          |
| <b>B40.</b> In your opinion, is it acceptable for<br>females to smoke waterpipe in general?                                       | Yes .....[]1<br>No .....[]2<br>Don't know .....[] 999<br>No response .....[] 777                                                                                                                                          |

Would you consider purchasing any tobacco products (cigarettes, arguileh tobacco, arguileh delivery, arguileh at a café,) at any time in the future?

Yes .....[]1

No.....[]2

If the answer is "No" the interviewer should skip the DCE scenarios.

1  
2  
3  
4  
5  
6  
7  
8  
9  
10  
11  
12  
13  
14  
15  
16  
17  
18  
19  
20  
21  
22  
23  
24  
25  
26  
27  
28  
29  
30  
31  
32  
33  
34  
35  
36  
37  
38  
39  
40  
41  
42  
43  
44  
45  
46  
47  
48  
49  
50  
51  
52  
53  
54  
55  
56  
57  
58  
59  
60

For peer review only

## SECTION C: DISCRETE CHOICE EXPERIMENT

### *Description:*

- In the next section, you will see 8 hypothetical choice scenarios about buying tobacco for yourself, the only difference between the scenarios is the price of the tobacco products
- Each scenario will present you with 8 different tobacco products that you may purchase:
  1. Premium cigarettes like Marlboro, Davidoff, and Gitanes
  2. Discount cigarettes like Byblos, Cedars, and Maestro
  3. Premium mouassal arguileh tobacco (250 g) like Al Fakher, Nakhla, and Mazaya
  4. Discount mouassal arguileh tobacco (250 g) like Ya layl, Al Tamayoz
  5. Ajami arguileh tobacco (250 g) like Al Zaeem, Al Bacha, and Tombac Asfahani

6. Home-delivery of prepared arguileh
7. Baladi/sha'bi arguileh cafes
8. Fancy arguileh cafes

- Each of the 8 product categories will have its own price, and the prices change in each scenario.
- You will be asked to imagine yourself buying your needs of arguileh and cigarette smoking products as you would typically in real life, and tell us how many items you would buy.
- You may choose to buy 1 or more items from some types and none (i.e. 0) from others. You may choose to buy nothing at all, in which case the answer will be 0 for all 8 tobacco products.
- Please seriously consider the prices at which each item is being offered when making your decision about the quantities. Make sure that the sum you spend on these products is in line with your budget for buying tobacco. Also, keep in mind that the money you spend on tobacco products will not be available for you to spend on other things.
- Here is an example of a choice scenario:

**. Think about the amount of arguileh and cigarette products you would purchase, based on the following prices:**

|          | Cigarettes premium | Cigarettes discount | Arguileh tobacco premium | Arguileh tobacco discount | Ajami      | Arguileh home delivery | Arguileh at fancy cafe | Arguileh session at Sha'bi cafe |
|----------|--------------------|---------------------|--------------------------|---------------------------|------------|------------------------|------------------------|---------------------------------|
|          | Pack of 20         | Pack of 20          | 250g pack                | 250g pack                 | 250g pack  | 1 waterpipe            | 1 waterpipe            | 1 waterpipe                     |
| Price    | 5,000 L.L          | 1,250 L.L           | 13,500 L.L               | 10,250 L.L                | 20,000 L.L | 7,500 L.L              | 15,000 L.L             | 7,500 L.L                       |
| Quantity | <i>1</i>           | <i>0</i>            | <i>2</i>                 | <i>0</i>                  | <i>0</i>   | <i>0</i>               | <i>1</i>               | <i>2</i>                        |

Now I leave you to complete the choice scenarios. **[INTERVIEWER: LEAVE THE PARTICIPANT TO FILL IN THE CHOICE SETS]**

**VERSION 1**

C1. Think about the amount of arguileh and cigarette products you would purchase, based on the following prices:

|          | Cigarettes premium | Cigarettes discount | Arguileh tobacco premium | Arguileh tobacco discount | Tombac Ajami | Arguileh home delivery | Arguileh café session premium | Arguileh café session at Sha'bi café |
|----------|--------------------|---------------------|--------------------------|---------------------------|--------------|------------------------|-------------------------------|--------------------------------------|
|          | Pack of 20         | Pack of 20          | 250g pack                | 250g pack                 | 250g pack    | 1 waterpipe            | 1 waterpipe                   | 1 waterpipe                          |
| Price    | 2, 500 L.L         | 750 L.L             | 13, 500 L.L              | 10, 250 L.L               | 20, 000 L.L  | 7, 500 L.L             | 15, 000 L.L                   | 7, 500 LL                            |
| Quantity |                    |                     |                          |                           |              |                        |                               |                                      |

C2. Think about the amount of arguileh and cigarette products you would purchase, based on the following prices:

|          | Cigarettes premium | Cigarettes discount | Arguileh tobacco premium | Arguileh tobacco discount | Arguileh tobacco non-flavored | Arguileh home delivery | Arguileh café session premium | Arguileh café session at Sha'bi café |
|----------|--------------------|---------------------|--------------------------|---------------------------|-------------------------------|------------------------|-------------------------------|--------------------------------------|
|          | Pack of 20         | Pack of 20          | 250g pack                | 250g pack                 | 250g pack                     | 1 waterpipe            | 1 waterpipe                   | 1 waterpipe                          |
| Price    | 2, 500 L.L         | 750 L.L             | 20, 250 L.L              | 15, 250 L.L               | 67, 500 L.L                   | 25, 250 L.L            | 33, 750 L.L                   | 16, 750 L.L                          |
| Quantity |                    |                     |                          |                           |                               |                        |                               |                                      |

**C3. Think about the amount of arguileh and cigarette products you would purchase, based on the following prices:**

|          | Cigarettes premium | Cigarettes discount | Arguileh tobacco premium | Arguileh tobacco discount | Tombac Ajami | Arguileh home delivery | Arguileh café session premium | Arguileh café session at Sha'bi café |
|----------|--------------------|---------------------|--------------------------|---------------------------|--------------|------------------------|-------------------------------|--------------------------------------|
|          | Pack of 20         | Pack of 20          | 250g pack                | 250g pack                 | 250g pack    | 1 waterpipe            | 1 waterpipe                   | 1 waterpipe                          |
| Price    | 4, 000 L.L         | 1, 250 L.L          | 30, 250 L.L              | 10, 250 L.L               | 45, 000 L.L  | 16, 750 L.L            | 50, 500 L.L                   | 25, 250 L.L                          |
| Quantity |                    |                     |                          |                           |              |                        |                               |                                      |

**C4. Think about the amount of arguileh and cigarette products you would purchase, based on the following prices:**

|          | Cigarettes premium | Cigarettes discount | Arguileh tobacco premium | Arguileh tobacco discount | Tombac Ajami | Arguileh home delivery | Arguileh café session premium | Arguileh café session at Sha'bi café |
|----------|--------------------|---------------------|--------------------------|---------------------------|--------------|------------------------|-------------------------------|--------------------------------------|
|          | Pack of 20         | Pack of 20          | 250g pack                | 250g pack                 | 250g pack    | 1 waterpipe            | 1 waterpipe                   | 1 waterpipe                          |
| Price    | 4, 000 L.L         | 1, 250 L.L          | 45, 500 L.L              | 15, 250 L.L               | 30, 000 L.L  | 11, 250 L.L            | 22, 500 L.L                   | 11, 250 L.L                          |
| Quantity |                    |                     |                          |                           |              |                        |                               |                                      |

C5. Think about the amount of arguileh and cigarette products you would purchase, based on the following prices:

|                | Cigarettes premium | Cigarettes discount | Arguileh tobacco premium | Arguileh tobacco discount | Tombac Ajami | Arguileh home delivery | Arguileh café session premium | Arguileh café session at Sha'bi café |
|----------------|--------------------|---------------------|--------------------------|---------------------------|--------------|------------------------|-------------------------------|--------------------------------------|
|                | Pack of 20         | Pack of 20          | 250g pack                | 250g pack                 | 250g pack    | 1 waterpipe            | 1 waterpipe                   | 1 waterpipe                          |
| Price          | 5, 500 L.L         | 1, 750 L.L          | 13, 500 L.L              | 23, 000 L.L               | 45, 000 L.L  | 16, 750 L.L            | 33, 750 L.L                   | 16, 750 L.L                          |
| Enter quantity |                    |                     |                          |                           |              |                        |                               |                                      |

C6. Think about the amount of arguileh and cigarette products you would purchase, based on the following prices:

|                | Cigarettes premium | Cigarettes discount | Arguileh tobacco premium | Arguileh tobacco discount | Tombac Ajami | Arguileh home delivery | Arguileh café session premium | Arguileh café session at Sha'bi café |
|----------------|--------------------|---------------------|--------------------------|---------------------------|--------------|------------------------|-------------------------------|--------------------------------------|
|                | Pack of 20         | Pack of 20          | 250g pack                | 250g pack                 | 250g pack    | 1 waterpipe            | 1 waterpipe                   | 1 waterpipe                          |
| Price          | 5, 500 L.L         | 1, 750 L.L          | 20, 250 L.L              | 34, 500 L.L               | 30, 000 L.L  | 11, 250 L.L            | 15, 000 L.L                   | 7, 500 L.L                           |
| Enter quantity |                    |                     |                          |                           |              |                        |                               |                                      |

**C7. Think about the amount of arguileh and cigarette products you would purchase, based on the following prices:**

|          | Cigarettes premium | Cigarettes discount | Arguileh tobacco premium | Arguileh tobacco discount | Tombac Ajami | Arguileh home delivery | Arguileh café session premium | Arguileh café session at Sha'bi café |
|----------|--------------------|---------------------|--------------------------|---------------------------|--------------|------------------------|-------------------------------|--------------------------------------|
|          | Pack of 20         | Pack of 20          | 250g pack                | 250g pack                 | 250g pack    | 1 waterpipe            | 1 waterpipe                   | 1 waterpipe                          |
| Price    | 8, 000 L.L         | 2, 500 L.L          | 30, 250 L.L              | 23, 000 L.L               | 20, 000 L.L  | 7, 500 L.L             | 22, 500 L.L                   | 11, 250 L.L                          |
| Quantity |                    |                     |                          |                           |              |                        |                               |                                      |

**C8. Think about the amount of arguileh and cigarette products you would purchase, based on the following prices:**

|          | Cigarettes premium | Cigarettes discount | Arguileh tobacco premium | Arguileh tobacco discount | Tombac Ajami | Arguileh home delivery | Arguileh Café session premium | Waterpipe café session at Sha'bi café |
|----------|--------------------|---------------------|--------------------------|---------------------------|--------------|------------------------|-------------------------------|---------------------------------------|
|          | Pack of 20         | Pack of 20          | 250g pack                | 250g pack                 | 250g pack    | 1 waterpipe            | 1 waterpipe                   | 1 waterpipe                           |
| Price    | 8, 000 L.L         | 2, 500 L.L          | 45, 500 L.L              | 34, 500 L.L               | 67, 500 L.L  | 25, 250 L.L            | 50, 500 L.L                   | 25, 250 L.L                           |
| Quantity |                    |                     |                          |                           |              |                        |                               |                                       |



## VERSION 2

C1. Think about the amount of arguileh and cigarette products you would purchase, based on the following prices:

|          | Cigarettes premium | Cigarettes discount | Arguileh tobacco premium | Arguileh tobacco discount | Tombac Ajami | Arguileh home delivery | Arguileh café session premium | Arguileh café session at Sha'bi café |
|----------|--------------------|---------------------|--------------------------|---------------------------|--------------|------------------------|-------------------------------|--------------------------------------|
|          | Pack of 20         | Pack of 20          | 250g pack                | 250g pack                 | 250g pack    | 1 waterpipe            | 1 waterpipe                   | 1 waterpipe                          |
| Price    | 2, 500 L.L         | 1, 250 L.L          | 30, 250 L.L              | 34, 500 L.L               | 20, 000 L.L  | 11, 250 L.L            | 33, 750 L.L                   | 25, 250 LL                           |
| Quantity |                    |                     |                          |                           |              |                        |                               |                                      |

C2. Think about the amount of arguileh and cigarette products you would purchase, based on the following prices:

|          | Cigarettes premium | Cigarettes discount | Arguileh tobacco premium | Arguileh tobacco discount | Tombac Ajami | Arguileh home delivery | Arguileh café session premium | Arguileh café session at Sha'bi café |
|----------|--------------------|---------------------|--------------------------|---------------------------|--------------|------------------------|-------------------------------|--------------------------------------|
|          | Pack of 20         | Pack of 20          | 250g pack                | 250g pack                 | 250g pack    | 1 waterpipe            | 1 waterpipe                   | 1 waterpipe                          |
| Price    | 2, 500 L.L         | 1, 250 L.L          | 45, 500 L.L              | 23, 000 L.L               | 67, 500 L.L  | 16, 750 L.L            | 15, 000 L.L                   | 11, 250 L.L                          |
| Quantity |                    |                     |                          |                           |              |                        |                               |                                      |

**C3. Think about the amount of arguileh and cigarette products you would purchase, based on the following prices:**

|          | Cigarettes premium | Cigarettes discount | Arguileh tobacco premium | Arguileh tobacco discount | Tombac Ajami | Arguileh home delivery | Arguileh café session premium | Arguileh café session at Sha'bi café |
|----------|--------------------|---------------------|--------------------------|---------------------------|--------------|------------------------|-------------------------------|--------------------------------------|
|          | Pack of 20         | Pack of 20          | 250g pack                | 250g pack                 | 250g pack    | 1 waterpipe            | 1 waterpipe                   | 1 waterpipe                          |
| Price    | 4, 000 L.L         | 750 L.L             | 13, 500 L.L              | 34, 500 L.L               | 45, 000 L.L  | 25, 250 L.L            | 22, 500 L.L                   | 7, 500 L.L                           |
| Quantity |                    |                     |                          |                           |              |                        |                               |                                      |

**C4. Think about the amount of arguileh and cigarette products you would purchase, based on the following prices:**

|          | Cigarettes premium | Cigarettes discount | Arguileh tobacco premium | Arguileh tobacco discount | Tombac Ajami | Arguileh home delivery | Arguileh café session premium | Arguileh café session at Sha'bi café |
|----------|--------------------|---------------------|--------------------------|---------------------------|--------------|------------------------|-------------------------------|--------------------------------------|
|          | Pack of 20         | Pack of 20          | 250g pack                | 250g pack                 | 250g pack    | 1 waterpipe            | 1 waterpipe                   | 1 waterpipe                          |
| Price    | 4, 000 L.L         | 1,750 L.L           | 13, 500 L.L              | 23, 000 L.L               | 45, 000 L.L  | 16, 750 L.L            | 33, 750 L.L                   | 16, 750 L.L                          |
| Quantity |                    |                     |                          |                           |              |                        |                               |                                      |

**C5. Think about the amount of arguileh and cigarette products you would purchase, based on the following prices:**

|                | Cigarettes premium | Cigarettes discount | Arguileh tobacco premium | Arguileh tobacco discount | Tombac Ajami | Arguileh home delivery | Arguileh café session premium | Arguileh café session at Sha'bi café |
|----------------|--------------------|---------------------|--------------------------|---------------------------|--------------|------------------------|-------------------------------|--------------------------------------|
|                | Pack of 20         | Pack of 20          | 250g pack                | 250g pack                 | 250g pack    | 1 waterpipe            | 1 waterpipe                   | 1 waterpipe                          |
| Price          | 5, 500 L.L         | 2, 500 L.L          | 30, 250 L.L              | 15, 250 L.L               | 45, 000 L.L  | 25, 250 L.L            | 15, 000 L.L                   | 11, 250 L.L                          |
| Enter quantity |                    |                     |                          |                           |              |                        |                               |                                      |

**C6. Think about the amount of arguileh and cigarette products you would purchase, based on the following prices:**

|                | Cigarettes premium | Cigarettes discount | Arguileh tobacco premium | Arguileh tobacco discount | Tombac Ajami | Arguileh home delivery | Arguileh café session premium | Arguileh café session at Sha'bi café |
|----------------|--------------------|---------------------|--------------------------|---------------------------|--------------|------------------------|-------------------------------|--------------------------------------|
|                | Pack of 20         | Pack of 20          | 250g pack                | 250g pack                 | 250g pack    | 1 waterpipe            | 1 waterpipe                   | 1 waterpipe                          |
| Price          | 5, 500 L.L         | 2, 500 L.L          | 45, 500 L.L              | 10, 250 L.L               | 30, 000 L.L  | 7, 500 L.L             | 33, 750 L.L                   | 25, 250 L.L                          |
| Enter quantity |                    |                     |                          |                           |              |                        |                               |                                      |

**C7. Think about the amount of arguileh and cigarette products you would purchase, based on the following prices:**

|          | Cigarettes premium | Cigarettes discount | Arguileh tobacco premium | Arguileh tobacco discount | Tombac Ajami | Arguileh home delivery | Arguileh café session premium | Arguileh café session at Sha'bi café |
|----------|--------------------|---------------------|--------------------------|---------------------------|--------------|------------------------|-------------------------------|--------------------------------------|
|          | Pack of 20         | Pack of 20          | 250g pack                | 250g pack                 | 250g pack    | 1 waterpipe            | 1 waterpipe                   | 1 waterpipe                          |
| Price    | 8,000 L.L          | 1,750 L.L           | 13,500 L.L               | 15,250 L.L                | 20,000 L.L   | 11,250 L.L             | 50,500 L.L                    | 16,750 L.L                           |
| Quantity |                    |                     |                          |                           |              |                        |                               |                                      |

**C8. Think about the amount of arguileh and cigarette products you would purchase, based on the following prices:**

|          | Cigarettes premium | Cigarettes discount | Arguileh tobacco premium | Arguileh tobacco discount | Tombac Ajami | Arguileh home delivery | Arguileh Café session premium | Waterpipe café session at Sha'bi café |
|----------|--------------------|---------------------|--------------------------|---------------------------|--------------|------------------------|-------------------------------|---------------------------------------|
|          | Pack of 20         | Pack of 20          | 250g pack                | 250g pack                 | 250g pack    | 1 waterpipe            | 1 waterpipe                   | 1 waterpipe                           |
| Price    | 8,000 L.L          | 1,750 L.L           | 20,250 L.L               | 10,250 L.L                | 67,500 L.L   | 16,750 L.L             | 22,500 L.L                    | 7,500 L.L                             |
| Quantity |                    |                     |                          |                           |              |                        |                               |                                       |

## VERSION 3

C1. Think about the amount of arguileh and cigarette products you would purchase, based on the following prices:

|          | Cigarettes premium | Cigarettes discount | Arguileh tobacco premium | Arguileh tobacco discount | Tombac Ajami | Arguileh home delivery | Arguileh café session premium | Arguileh café session at Sha'bi café |
|----------|--------------------|---------------------|--------------------------|---------------------------|--------------|------------------------|-------------------------------|--------------------------------------|
|          | Pack of 20         | Pack of 20          | 250g pack                | 250g pack                 | 250g pack    | 1 waterpipe            | 1 waterpipe                   | 1 waterpipe                          |
| Price    | 2, 500 L.L         | 1, 750 L.L          | 13, 500 L.L              | 23, 000 L.L               | 30, 000 L.L  | 25, 250 L.L            | 22, 500 L.L                   | 25, 250 LL                           |
| Quantity |                    |                     |                          |                           |              |                        |                               |                                      |

C2. Think about the amount of arguileh and cigarette products you would purchase, based on the following prices:

|          | Cigarettes premium | Cigarettes discount | Arguileh tobacco premium | Arguileh tobacco discount | Tombac Ajami | Arguileh home delivery | Arguileh café session premium | Arguileh café session at Sha'bi café |
|----------|--------------------|---------------------|--------------------------|---------------------------|--------------|------------------------|-------------------------------|--------------------------------------|
|          | Pack of 20         | Pack of 20          | 250g pack                | 250g pack                 | 250g pack    | 1 waterpipe            | 1 waterpipe                   | 1 waterpipe                          |
| Price    | 2, 500 L.L         | 1, 750 L.L          | 20, 250 L.L              | 34, 500 L.L               | 45, 000 L.L  | 7, 500 L.L             | 50, 500 L.L                   | 11, 250 L.L                          |
| Quantity |                    |                     |                          |                           |              |                        |                               |                                      |

**C3. Think about the amount of arguileh and cigarette products you would purchase, based on the following prices:**

|          | Cigarettes premium | Cigarettes discount | Arguileh tobacco premium | Arguileh tobacco discount | Tombac Ajami | Arguileh home delivery | Arguileh café session premium | Arguileh café session at Sha'bi café |
|----------|--------------------|---------------------|--------------------------|---------------------------|--------------|------------------------|-------------------------------|--------------------------------------|
|          | Pack of 20         | Pack of 20          | 250g pack                | 250g pack                 | 250g pack    | 1 waterpipe            | 1 waterpipe                   | 1 waterpipe                          |
| Price    | 4, 000 L.L         | 2, 500 L.L          | 30, 250 L.L              | 23, 000 L.L               | 67, 500 L.L  | 11, 250 L.L            | 33, 750 L.L                   | 7, 500 L.L                           |
| Quantity |                    |                     |                          |                           |              |                        |                               |                                      |

**C4. Think about the amount of arguileh and cigarette products you would purchase, based on the following prices:**

|          | Cigarettes premium | Cigarettes discount | Arguileh tobacco premium | Arguileh tobacco discount | Tombac Ajami | Arguileh home delivery | Arguileh café session premium | Arguileh café session at Sha'bi café |
|----------|--------------------|---------------------|--------------------------|---------------------------|--------------|------------------------|-------------------------------|--------------------------------------|
|          | Pack of 20         | Pack of 20          | 250g pack                | 250g pack                 | 250g pack    | 1 waterpipe            | 1 waterpipe                   | 1 waterpipe                          |
| Price    | 4, 000 L.L         | 2, 500 L.L          | 45, 500 L.L              | 34, 500 L.L               | 20, 000 L.L  | 16, 750 L.L            | 15, 000 L.L                   | 16, 750 L.L                          |
| Quantity |                    |                     |                          |                           |              |                        |                               |                                      |

C5. Think about the amount of arguileh and cigarette products you would purchase, based on the following prices:

|                | Cigarettes premium | Cigarettes discount | Arguileh tobacco premium | Arguileh tobacco discount | Tombac Ajami | Arguileh home delivery | Arguileh café session premium | Arguileh café session at Sha'bi café |
|----------------|--------------------|---------------------|--------------------------|---------------------------|--------------|------------------------|-------------------------------|--------------------------------------|
|                | Pack of 20         | Pack of 20          | 250g pack                | 250g pack                 | 250g pack    | 1 waterpipe            | 1 waterpipe                   | 1 waterpipe                          |
| Price          | 5, 500 L.L         | 750 L.L             | 13, 500 L.L              | 10, 250 L.L               | 67, 500 L.L  | 11, 250 L.L            | 50, 500 L.L                   | 11, 250 L.L                          |
| Enter quantity |                    |                     |                          |                           |              |                        |                               |                                      |

C6. Think about the amount of arguileh and cigarette products you would purchase, based on the following prices:

|                | Cigarettes premium | Cigarettes discount | Arguileh tobacco premium | Arguileh tobacco discount | Tombac Ajami | Arguileh home delivery | Arguileh café session premium | Arguileh café session at Sha'bi café |
|----------------|--------------------|---------------------|--------------------------|---------------------------|--------------|------------------------|-------------------------------|--------------------------------------|
|                | Pack of 20         | Pack of 20          | 250g pack                | 250g pack                 | 250g pack    | 1 waterpipe            | 1 waterpipe                   | 1 waterpipe                          |
| Price          | 5, 500 L.L         | 750 L.L             | 20, 250 L.L              | 15, 250 L.L               | 20, 000 L.L  | 16, 750 L.L            | 22, 500 L.L                   | 25, 250 L.L                          |
| Enter quantity |                    |                     |                          |                           |              |                        |                               |                                      |

**C7. Think about the amount of arguileh and cigarette products you would purchase, based on the following prices:**

|          | Cigarettes premium | Cigarettes discount | Arguileh tobacco premium | Arguileh tobacco discount | Tombac Ajami | Arguileh home delivery | Arguileh café session premium | Arguileh café session at Sha'bi café |
|----------|--------------------|---------------------|--------------------------|---------------------------|--------------|------------------------|-------------------------------|--------------------------------------|
|          | Pack of 20         | Pack of 20          | 250g pack                | 250g pack                 | 250g pack    | 1 waterpipe            | 1 waterpipe                   | 1 waterpipe                          |
| Price    | 8,000 L.L          | 1, 250 L.L          | 30, 250 L.L              | 10, 250 L.L               | 30, 000 L.L  | 25, 250 L.L            | 15, 000 L.L                   | 16, 750 L.L                          |
| Quantity |                    |                     |                          |                           |              |                        |                               |                                      |

**C8. Think about the amount of arguileh and cigarette products you would purchase, based on the following prices:**

|          | Cigarettes premium | Cigarettes discount | Arguileh tobacco premium | Arguileh tobacco discount | Tombac Ajami | Arguileh home delivery | Arguileh Café session premium | Waterpipe café session at Sha'bi café |
|----------|--------------------|---------------------|--------------------------|---------------------------|--------------|------------------------|-------------------------------|---------------------------------------|
|          | Pack of 20         | Pack of 20          | 250g pack                | 250g pack                 | 250g pack    | 1 waterpipe            | 1 waterpipe                   | 1 waterpipe                           |
| Price    | 8, 000 L.L         | 1, 250 L.L.         | 45, 500 L.L              | 15, 250 L.L               | 45, 000 L.L  | 7, 500 L.L             | 33, 750 L.L                   | 7, 500 L.L                            |
| Quantity |                    |                     |                          |                           |              |                        |                               |                                       |



## VERSION 4

C1. Think about the amount of arguileh and cigarette products you would purchase, based on the following prices:

|          | Cigarettes premium | Cigarettes discount | Arguileh tobacco premium | Arguileh tobacco discount | Tombac Ajami | Arguileh home delivery | Arguileh café session premium | Arguileh café session at Sha'bi café |
|----------|--------------------|---------------------|--------------------------|---------------------------|--------------|------------------------|-------------------------------|--------------------------------------|
|          | Pack of 20         | Pack of 20          | 250g pack                | 250g pack                 | 250g pack    | 1 waterpipe            | 1 waterpipe                   | 1 waterpipe                          |
| Price    | 2, 500 L.L         | 2, 500 L.L          | 30, 250 L.L              | 15, 250 L.L               | 30, 000 L.L  | 16, 750 L.L            | 50, 500 L.L                   | 7, 500 LL                            |
| Quantity |                    |                     |                          |                           |              |                        |                               |                                      |

C2. Think about the amount of arguileh and cigarette products you would purchase, based on the following prices:

|          | Cigarettes premium | Cigarettes discount | Arguileh tobacco premium | Arguileh tobacco discount | Tombac Ajami | Arguileh home delivery | Arguileh café session premium | Arguileh café session at Sha'bi café |
|----------|--------------------|---------------------|--------------------------|---------------------------|--------------|------------------------|-------------------------------|--------------------------------------|
|          | Pack of 20         | Pack of 20          | 250g pack                | 250g pack                 | 250g pack    | 1 waterpipe            | 1 waterpipe                   | 1 waterpipe                          |
| Price    | 2, 500 L.L         | 2, 500 L.L          | 45, 500 L.L              | 10, 250 L.L               | 45, 000 L.L  | 11, 250 L.L            | 22, 500 L.L                   | 16, 750 L.L                          |
| Quantity |                    |                     |                          |                           |              |                        |                               |                                      |

**C3. Think about the amount of arguileh and cigarette products you would purchase, based on the following prices:**

|          | Cigarettes premium | Cigarettes discount | Arguileh tobacco premium | Arguileh tobacco discount | Tombac Ajami | Arguileh home delivery | Arguileh café session premium | Arguileh café session at Sha'bi café |
|----------|--------------------|---------------------|--------------------------|---------------------------|--------------|------------------------|-------------------------------|--------------------------------------|
|          | Pack of 20         | Pack of 20          | 250g pack                | 250g pack                 | 250g pack    | 1 waterpipe            | 1 waterpipe                   | 1 waterpipe                          |
| Price    | 4, 000 L.L         | 1, 750 L.L          | 13, 500 L.L              | 15, 250 L.L               | 67, 500 L.L  | 7, 500 L.L             | 15, 000 L.L                   | 25, 250 L.L                          |
| Quantity |                    |                     |                          |                           |              |                        |                               |                                      |

**C4. Think about the amount of arguileh and cigarette products you would purchase, based on the following prices:**

|          | Cigarettes premium | Cigarettes discount | Arguileh tobacco premium | Arguileh tobacco discount | Tombac Ajami | Arguileh home delivery | Arguileh café session premium | Arguileh café session at Sha'bi café |
|----------|--------------------|---------------------|--------------------------|---------------------------|--------------|------------------------|-------------------------------|--------------------------------------|
|          | Pack of 20         | Pack of 20          | 250g pack                | 250g pack                 | 250g pack    | 1 waterpipe            | 1 waterpipe                   | 1 waterpipe                          |
| Price    | 4, 000 L.L         | 1, 750 L.L          | 20, 250 L.L              | 10, 250 L.L               | 20, 000 L.L  | 25, 250 L.L            | 33, 750 L.L                   | 11, 250 L.L                          |
| Quantity |                    |                     |                          |                           |              |                        |                               |                                      |

C5. Think about the amount of arguileh and cigarette products you would purchase, based on the following prices:

|                | Cigarettes premium | Cigarettes discount | Arguileh tobacco premium | Arguileh tobacco discount | Tombac Ajami | Arguileh home delivery | Arguileh café session premium | Arguileh café session at Sha'bi café |
|----------------|--------------------|---------------------|--------------------------|---------------------------|--------------|------------------------|-------------------------------|--------------------------------------|
|                | Pack of 20         | Pack of 20          | 250g pack                | 250g pack                 | 250g pack    | 1 waterpipe            | 1 waterpipe                   | 1 waterpipe                          |
| Price          | 5, 500 L.L         | 1, 250 L.L          | 30, 250 L.L              | 34, 500 L.L               | 67, 500 L.L  | 7, 500 L.L             | 22, 500 L.L                   | 16, 750 L.L                          |
| Enter quantity |                    |                     |                          |                           |              |                        |                               |                                      |

C6. Think about the amount of arguileh and cigarette products you would purchase, based on the following prices:

|                | Cigarettes premium | Cigarettes discount | Arguileh tobacco premium | Arguileh tobacco discount | Tombac Ajami | Arguileh home delivery | Arguileh café session premium | Arguileh café session at Sha'bi café |
|----------------|--------------------|---------------------|--------------------------|---------------------------|--------------|------------------------|-------------------------------|--------------------------------------|
|                | Pack of 20         | Pack of 20          | 250g pack                | 250g pack                 | 250g pack    | 1 waterpipe            | 1 waterpipe                   | 1 waterpipe                          |
| Price          | 5, 500 L.L         | 1, 250 L.L          | 45, 500 L.L              | 23, 000 L.L               | 20, 000 L.L  | 25, 250 L.L            | 50, 500 L.L                   | 7, 500 L.L                           |
| Enter quantity |                    |                     |                          |                           |              |                        |                               |                                      |

**C7. Think about the amount of arguileh and cigarette products you would purchase, based on the following prices:**

|          | Cigarettes premium | Cigarettes discount | Arguileh tobacco premium | Arguileh tobacco discount | Tombac Ajami | Arguileh home delivery | Arguileh café session premium | Arguileh café session at Sha'bi café |
|----------|--------------------|---------------------|--------------------------|---------------------------|--------------|------------------------|-------------------------------|--------------------------------------|
|          | Pack of 20         | Pack of 20          | 250g pack                | 250g pack                 | 250g pack    | 1 waterpipe            | 1 waterpipe                   | 1 waterpipe                          |
| Price    | 8,000 L.L          | 750 L.L             | 13,500 L.L               | 34,500 L.L                | 30,000 L.L   | 16,750 L.L             | 33,750 L.L                    | 11,250 L.L                           |
| Quantity |                    |                     |                          |                           |              |                        |                               |                                      |

**C8. Think about the amount of arguileh and cigarette products you would purchase, based on the following prices:**

|          | Cigarettes premium | Cigarettes discount | Arguileh tobacco premium | Arguileh tobacco discount | Tombac Ajami | Arguileh home delivery | Arguileh Café session premium | Waterpipe café session at Sha'bi café |
|----------|--------------------|---------------------|--------------------------|---------------------------|--------------|------------------------|-------------------------------|---------------------------------------|
|          | Pack of 20         | Pack of 20          | 250g pack                | 250g pack                 | 250g pack    | 1 waterpipe            | 1 waterpipe                   | 1 waterpipe                           |
| Price    | 8,000 L.L          | 750 L.L.            | 20,250 L.L               | 23,000 L.L                | 45,000 L.L   | 11,250 L.L             | 15,000 L.L                    | 25,250 L.L                            |
| Quantity |                    |                     |                          |                           |              |                        |                               |                                       |

For non-smokers only :

Interviewer: Fill this for non-smokers only. Choose the appropriate option.

- 1- The participant filled out the scenarios
- 2- The participant partially filled out the scenarios or the interviewer completed the scenarios.

STROBE Statement—Checklist of items that should be included in reports of *cross-sectional studies*

|                              | Item No | Recommendation                                                                                                                                                                                    | Page No |
|------------------------------|---------|---------------------------------------------------------------------------------------------------------------------------------------------------------------------------------------------------|---------|
| <b>Title and abstract</b>    | 1       | (a) Indicate the study's design with a commonly used term in the title or the abstract                                                                                                            | 1       |
|                              |         | (b) Provide in the abstract an informative and balanced summary of what was done and what was found                                                                                               | 2       |
| <b>Introduction</b>          |         |                                                                                                                                                                                                   |         |
| Background/rationale         | 2       | Explain the scientific background and rationale for the investigation being reported                                                                                                              | 3       |
| Objectives                   | 3       | State specific objectives, including any prespecified hypotheses                                                                                                                                  | 4       |
| <b>Methods</b>               |         |                                                                                                                                                                                                   |         |
| Study design                 | 4       | Present key elements of study design early in the paper                                                                                                                                           | 4       |
| Setting                      | 5       | Describe the setting, locations, and relevant dates, including periods of recruitment, exposure, follow-up, and data collection                                                                   | 4       |
| Participants                 | 6       | (a) Give the eligibility criteria, and the sources and methods of selection of participants                                                                                                       | 4       |
| Variables                    | 7       | Clearly define all outcomes, exposures, predictors, potential confounders, and effect modifiers. Give diagnostic criteria, if applicable                                                          | 5       |
| Data sources/<br>measurement | 8*      | For each variable of interest, give sources of data and details of methods of assessment (measurement). Describe comparability of assessment methods if there is more than one group              | 5       |
| Bias                         | 9       | Describe any efforts to address potential sources of bias                                                                                                                                         | 5       |
| Study size                   | 10      | Explain how the study size was arrived at                                                                                                                                                         | 4       |
| Quantitative variables       | 11      | Explain how quantitative variables were handled in the analyses. If applicable, describe which groupings were chosen and why                                                                      | 5       |
| Statistical methods          | 12      | (a) Describe all statistical methods, including those used to control for confounding                                                                                                             | 5       |
|                              |         | (b) Describe any methods used to examine subgroups and interactions                                                                                                                               | 5       |
|                              |         | (c) Explain how missing data were addressed                                                                                                                                                       | 5       |
|                              |         | (d) If applicable, describe analytical methods taking account of sampling strategy                                                                                                                | 5       |
|                              |         | (e) Describe any sensitivity analyses                                                                                                                                                             | 5       |
| <b>Results</b>               |         |                                                                                                                                                                                                   |         |
| Participants                 | 13*     | (a) Report numbers of individuals at each stage of study—eg numbers potentially eligible, examined for eligibility, confirmed eligible, included in the study, completing follow-up, and analysed | 4       |
|                              |         | (b) Give reasons for non-participation at each stage                                                                                                                                              |         |
|                              |         | (c) Consider use of a flow diagram                                                                                                                                                                |         |

|                                                                                  |                          |     |                                                                                                                                                                                                                                       |                               |                                                              |
|----------------------------------------------------------------------------------|--------------------------|-----|---------------------------------------------------------------------------------------------------------------------------------------------------------------------------------------------------------------------------------------|-------------------------------|--------------------------------------------------------------|
| 1<br>2<br>3<br>4<br>5<br>6<br>7                                                  | Descriptive data         | 14* | (a) Give characteristics of study participants (eg demographic, clinical, social) and information on exposures and potential confounders<br><hr/> (b) Indicate number of participants with missing data for each variable of interest | 5 – 6                         |                                                              |
| 8<br>9                                                                           | Outcome data             | 15* | Report numbers of outcome events or summary measures                                                                                                                                                                                  | 6-12                          |                                                              |
| 10<br>11<br>12<br>13<br>14<br>15<br>16<br>17<br>18<br>19                         | Main results             | 16  | (a) Give unadjusted estimates and, if applicable, confounder-adjusted estimates and their precision (eg, 95% confidence interval). Make clear which confounders were adjusted for and why they were included                          | 6-12                          |                                                              |
| 20<br>21<br>22                                                                   |                          |     | (b) Report category boundaries when continuous variables were categorized                                                                                                                                                             |                               | p.6 (table 1), p.8 (table 2), p.10 (table 3), p.12 (table 4) |
| 23<br>24                                                                         |                          |     | (c) If relevant, consider translating estimates of relative risk into absolute risk for a meaningful time period                                                                                                                      |                               |                                                              |
| 25<br>26<br>27<br>28<br>29<br>30<br>31<br>32<br>33<br>34<br>35<br>36<br>37       | Other analyses           | 17  | Report other analyses done—eg analyses of subgroups and interactions, and sensitivity analyses                                                                                                                                        | p.6 (table 1), p.8 (table 2), |                                                              |
| 38                                                                               | <b>Discussion</b>        |     |                                                                                                                                                                                                                                       |                               |                                                              |
| 39<br>40<br>41<br>42                                                             | Key results              | 18  | Summarise key results with reference to study objectives                                                                                                                                                                              | 13                            |                                                              |
| 43<br>44<br>45<br>46                                                             | Limitations              | 19  | Discuss limitations of the study, taking into account sources of potential bias or imprecision. Discuss both direction and magnitude of any potential bias                                                                            | 14                            |                                                              |
| 47<br>48<br>49<br>50<br>51<br>52<br>53<br>54<br>55<br>56<br>57<br>58<br>59<br>60 | Interpretation           | 20  | Give a cautious overall interpretation of results considering objectives, limitations, multiplicity of analyses, results from similar studies, and other relevant evidence                                                            | 13                            |                                                              |
|                                                                                  | Generalisability         | 21  | Discuss the generalisability (external validity) of the study results                                                                                                                                                                 | 13                            |                                                              |
|                                                                                  | <b>Other information</b> |     |                                                                                                                                                                                                                                       |                               |                                                              |
|                                                                                  | Funding                  | 22  | Give the source of funding and the role of the funders for the present study and, if applicable, for the original study on which the present article is based                                                                         | 15                            |                                                              |

\*Give information separately for exposed and unexposed groups.

**Note:** An Explanation and Elaboration article discusses each checklist item and gives methodological background and published examples of transparent reporting. The STROBE checklist is best used in conjunction with this article (freely available on the Web sites of PLoS Medicine at <http://www.plosmedicine.org/>, Annals of Internal Medicine at <http://www.annals.org/>, and Epidemiology at <http://www.epidem.com/>). Information on the STROBE Initiative is available at [www.strobe-statement.org](http://www.strobe-statement.org).
