# Supplementary material for: Prevalence of cigarette and waterpipe tobacco smoking among adults in three Eastern Mediterranean countries: a cross-sectional household survey
Source: PubMed Central journal article supplement — BMJ Open. 2022 Mar 4;12(3):e055201. doi: 10.1136/bmjopen-2021-055201 (PMC8900030; doi:10.1136/bmjopen-2021-055201), 2022-03-04
Supplement: bmjopen-2021-055201supp001.pdf [file bmjopen-2021-055201supp001.pdf]

ECON-WTS 2018

## HOUSEHOLD QUESTIONNAIRE

### Survey on the Economics of Waterpipe Smoking in Lebanon

| HOUSEHOLD INFORMATION PANEL                                                 |                                                                                                                                                                                                                                                                                                                                                                                                              |
|-----------------------------------------------------------------------------|--------------------------------------------------------------------------------------------------------------------------------------------------------------------------------------------------------------------------------------------------------------------------------------------------------------------------------------------------------------------------------------------------------------|
| <b>HH1.</b> Cluster number:                    ___ ___ ___                  | <b>HH2.</b> Household number:                    ___ ___                                                                                                                                                                                                                                                                                                                                                     |
| <b>HH3.</b> Interviewer's name:<br>Name _____<br>ID number: ___ ___         | <b>HH4.</b> Supervisor's name:<br>Name _____                                                                                                                                                                                                                                                                                                                                                                 |
| <b>HH5.</b> Day / Month / Year of interview:<br>___ ___ / ___ ___ / ___ ___ | <b>HH6B. Governorate:</b><br>BEIRUT: ..... <input type="checkbox"/> 1<br>MOUNT LEBANON: ..... <input type="checkbox"/> 2<br>NORTH: ..... <input type="checkbox"/> 3<br>AKKAR: ..... <input type="checkbox"/> 4<br>BEKAA: ..... <input type="checkbox"/> 5<br>SOUTH: ..... <input type="checkbox"/> 6<br>EL NABATIEH: ..... <input type="checkbox"/> 7<br>BAALBEK-EL HERMEL: ..... <input type="checkbox"/> 8 |
| <b>HH6A.</b> LOCALITY NAME: _____                                           |                                                                                                                                                                                                                                                                                                                                                                                                              |
| <b>HH7.</b> Respondent number: ___ ___ ___                                  |                                                                                                                                                                                                                                                                                                                                                                                                              |

HH.1

ECON-WTS 2018

| <b>SECTION A: BACKGROUND CHARACTERISTICS</b>                      |                                                                                                                                                                                                                                                                                                                                                                                                                                                                                                                                                                                                                                                                           |
|-------------------------------------------------------------------|---------------------------------------------------------------------------------------------------------------------------------------------------------------------------------------------------------------------------------------------------------------------------------------------------------------------------------------------------------------------------------------------------------------------------------------------------------------------------------------------------------------------------------------------------------------------------------------------------------------------------------------------------------------------------|
| <b>A1.</b> Gender                                                 | <p><i>Interviewer: State gender at sight.</i></p> <p>Male.....<input type="checkbox"/> 1</p> <p>Female.....<input type="checkbox"/> 2</p>                                                                                                                                                                                                                                                                                                                                                                                                                                                                                                                                 |
| <b>A2.</b> What is your age?                                      | <p>___ ___ ___ Years</p> <p><i>If the respondent is not sure, the respondent will estimate the age</i></p> <p><i>Interviewer: round to the nearest integer if necessary.</i></p>                                                                                                                                                                                                                                                                                                                                                                                                                                                                                          |
| <b>A3.</b> What is your marital status?                           | <p>Single.....<input type="checkbox"/> 1</p> <p>Engaged.....<input type="checkbox"/> 2</p> <p>Married.....<input type="checkbox"/> 3</p> <p>Separated.....<input type="checkbox"/> 4</p> <p>Divorced.....<input type="checkbox"/> 5</p> <p>Widow(er).....<input type="checkbox"/> 6</p> <p>No response.....<input type="checkbox"/> 777</p>                                                                                                                                                                                                                                                                                                                               |
| <b>A4.</b> What is the highest education level you have obtained? | <p><i>Interviewer: participant can choose one item only:</i></p> <p>No formal education.....<input type="checkbox"/> 1</p> <p>Completed primary school.....<input type="checkbox"/> 2</p> <p>Completed middle school.....<input type="checkbox"/> 3</p> <p>Completed high school/equivalent education.....<input type="checkbox"/> 4</p> <p>Completed 1-2-year post-secondary/vocational.....<input type="checkbox"/> 5</p> <p>Completed university/college.....<input type="checkbox"/> 6</p> <p>Completed postgraduate degree.....<input type="checkbox"/> 7</p> <p>Don't know.....<input type="checkbox"/> 999</p> <p>No response.....<input type="checkbox"/> 777</p> |

HH.2

ECON-WTS 2018

|                                                                                                                                                                                                                                                                                        |                                                                                                                                                                                                                                                                                                                                                                                                                                                                                                              |
|----------------------------------------------------------------------------------------------------------------------------------------------------------------------------------------------------------------------------------------------------------------------------------------|--------------------------------------------------------------------------------------------------------------------------------------------------------------------------------------------------------------------------------------------------------------------------------------------------------------------------------------------------------------------------------------------------------------------------------------------------------------------------------------------------------------|
| <p><b>A5.</b> What is your nationality?</p>                                                                                                                                                                                                                                            | <p><i>Interviewer: participant can choose more than one nationality</i></p> <p>Lebanese .....[] 1</p> <p>Syrian .....[]2</p> <p>Palestinian .....[]3</p> <p>Other: _____ ,..... []4</p>                                                                                                                                                                                                                                                                                                                      |
| <p><b>A6.</b> Which of the following best describe your employment status?</p>                                                                                                                                                                                                         | <p><i>Interviewer: Participant can choose all that apply</i></p> <p>Full-time employed in the workforce (including self-employed).....[] 1</p> <p>Part-time employed in the workforce (including self-employed).....[] 2</p> <p>Unemployed.....[] 3</p> <p>Retired or on a pension.....[] 4</p> <p>Full-time student.....[] 5</p> <p>Part-time student.....[] 6</p> <p>Housewife/ Home duties.....[] 7</p> <p>Other (specify) _____ .....[] 8</p> <p>Don't know.....[] 999</p> <p>No response.....[] 777</p> |
| <p><b>A7.</b> What is the best estimate of your <b>monthly household income</b>, that is, total income before taxes, or gross income, of all persons in your household combined. We ask this for statistical purposes. We assure your responses will remain strictly confidential.</p> | <p>Less than 800,000 L.L .....[] 1</p> <p>From 800,000 L.L to less than 1,500,000 L.L....[] 2</p> <p>From 1,500,000L.L to less than 3,000,000L.L ..[] 3</p> <p>3,000,000 L.L and more.....[] 4</p> <p>Don't know.....[] 999</p> <p>No response.....[] 777</p>                                                                                                                                                                                                                                                |
| <p><b>A8.</b> What is the best estimate of your <b>monthly individual income</b>, that is, your total income before taxes, or gross income. We ask this for statistical purposes. We assure your responses will remain strictly confidential.</p>                                      | <p>Less than 800,000 L.L .....[] 1</p> <p>From 800,000 L.L to less than 1,500,000 L.L....[] 2</p> <p>From 1,500,000L.L to less than 3,000,000L.L ..[] 3</p> <p>3,000,000 L.L and more.....[] 4</p> <p>No income .....[]5</p> <p>Don't know.....[] 999</p>                                                                                                                                                                                                                                                    |

HH.3

ECON-WTS 2018

|                                                                                                                                                                             |                                                                                                                                                                                                                                                             |
|-----------------------------------------------------------------------------------------------------------------------------------------------------------------------------|-------------------------------------------------------------------------------------------------------------------------------------------------------------------------------------------------------------------------------------------------------------|
|                                                                                                                                                                             | No response.....[] 777                                                                                                                                                                                                                                      |
| <b>A9.</b> In the last month, did you or anyone else in the household had to borrow money to pay any important bills on time, such as electricity, telephone or rent bills? | Yes.....[] 1<br>No.....[] 2<br>Don't know.....[] 999<br>No response.....[] 777                                                                                                                                                                              |
| <b>A10.</b> Who usually makes the decisions regarding the daily household purchases?<br>Daily household purchases include grocery or daily essentials etc..                 | Nobody .....[]1<br>Respondent alone .....[]2<br>Respondent and spouse/partner .....[]3<br>Respondent and other person .....[]4<br>Spouse /partner alone .....[]5<br>Someone else. Specify: _____.....[]6<br>Don't know.....[] 999<br>No response.....[] 777 |
| <b>A11.</b> Who usually makes the decisions regarding the large household purchases?<br>Large household purchases include furniture or a car etc...                         | Nobody .....[]1<br>Respondent alone .....[]2<br>Respondent and spouse/partner .....[]3<br>Respondent and other person .....[]4<br>Spouse/partner alone .....[]5<br>Someone else. Specify: _____.....[]6<br>Don't know.....[] 999<br>No response.....[] 777  |

HH.4

ECON-WTS 2018

| SECTION B: TOBACCO SMOKING                                                                                                         |                                                                                                                                                                                                                                                                                                                                                                                                                                                                                                                                                                                                                                                                                                                                                                                                                                                                                                                                                                                                                                                                                                                                                                                                                                                                                                                                            |           |            |           |            |              |  |  |  |        |  |  |  |                 |  |  |  |
|------------------------------------------------------------------------------------------------------------------------------------|--------------------------------------------------------------------------------------------------------------------------------------------------------------------------------------------------------------------------------------------------------------------------------------------------------------------------------------------------------------------------------------------------------------------------------------------------------------------------------------------------------------------------------------------------------------------------------------------------------------------------------------------------------------------------------------------------------------------------------------------------------------------------------------------------------------------------------------------------------------------------------------------------------------------------------------------------------------------------------------------------------------------------------------------------------------------------------------------------------------------------------------------------------------------------------------------------------------------------------------------------------------------------------------------------------------------------------------------|-----------|------------|-----------|------------|--------------|--|--|--|--------|--|--|--|-----------------|--|--|--|
| Tobacco Products                                                                                                                   |                                                                                                                                                                                                                                                                                                                                                                                                                                                                                                                                                                                                                                                                                                                                                                                                                                                                                                                                                                                                                                                                                                                                                                                                                                                                                                                                            |           |            |           |            |              |  |  |  |        |  |  |  |                 |  |  |  |
| <p><b>B1.</b> Do you currently use any tobacco products (cigarettes, arguileh, other tobacco products)?</p>                        | <p>Yes .....[]1<br/>                     No .....[]2<br/> <b>If answer is “no”, skip question B2-B35</b></p>                                                                                                                                                                                                                                                                                                                                                                                                                                                                                                                                                                                                                                                                                                                                                                                                                                                                                                                                                                                                                                                                                                                                                                                                                               |           |            |           |            |              |  |  |  |        |  |  |  |                 |  |  |  |
| <p><b>B2.</b> On average, how many of the following products do you <b>currently</b> smoke each (day/week/month)? (One option)</p> | <p><i>Interviewer: if respondent reports smoking the product but not every (day/week/month), enter 888</i></p> <p><b>Regular Cigarettes?</b><br/>                     _____ per day<br/>                     _____ per week<br/>                     _____ per month</p> <p><b>Number of arguileh sessions at home or someone else’s home?</b><br/>                     _____ per day<br/>                     _____ per week<br/>                     _____ per month</p> <p><b>Number of arguileh sessions in a café or restaurant?</b><br/>                     _____ per day<br/>                     _____ per week<br/>                     _____ per month</p> <p><b>Do you smoke any other tobacco products?</b><br/>                     Yes .....[]1<br/>                     No .....[]2<br/>                     If yes, specify:</p> <table border="1" style="width: 100%; border-collapse: collapse; margin-top: 10px;"> <thead> <tr> <th style="width: 60%;"></th> <th style="width: 15%;">Every day</th> <th style="width: 15%;">Some days</th> <th style="width: 10%;">Not at all</th> </tr> </thead> <tbody> <tr> <td>E-cigarettes</td> <td></td> <td></td> <td></td> </tr> <tr> <td>Cigars</td> <td></td> <td></td> <td></td> </tr> <tr> <td>Chewing Tobacco</td> <td></td> <td></td> <td></td> </tr> </tbody> </table> |           | Every day  | Some days | Not at all | E-cigarettes |  |  |  | Cigars |  |  |  | Chewing Tobacco |  |  |  |
|                                                                                                                                    | Every day                                                                                                                                                                                                                                                                                                                                                                                                                                                                                                                                                                                                                                                                                                                                                                                                                                                                                                                                                                                                                                                                                                                                                                                                                                                                                                                                  | Some days | Not at all |           |            |              |  |  |  |        |  |  |  |                 |  |  |  |
| E-cigarettes                                                                                                                       |                                                                                                                                                                                                                                                                                                                                                                                                                                                                                                                                                                                                                                                                                                                                                                                                                                                                                                                                                                                                                                                                                                                                                                                                                                                                                                                                            |           |            |           |            |              |  |  |  |        |  |  |  |                 |  |  |  |
| Cigars                                                                                                                             |                                                                                                                                                                                                                                                                                                                                                                                                                                                                                                                                                                                                                                                                                                                                                                                                                                                                                                                                                                                                                                                                                                                                                                                                                                                                                                                                            |           |            |           |            |              |  |  |  |        |  |  |  |                 |  |  |  |
| Chewing Tobacco                                                                                                                    |                                                                                                                                                                                                                                                                                                                                                                                                                                                                                                                                                                                                                                                                                                                                                                                                                                                                                                                                                                                                                                                                                                                                                                                                                                                                                                                                            |           |            |           |            |              |  |  |  |        |  |  |  |                 |  |  |  |

HH.5

ECON-WTS 2018

|                                                                                                       | <table border="1"> <tbody> <tr> <td>Midwakh/ Dokha</td> <td></td> <td></td> <td></td> </tr> <tr> <td>Roll your own cigarettes</td> <td></td> <td></td> <td></td> </tr> <tr> <td>Other. Specify</td> <td></td> <td></td> <td></td> </tr> <tr> <td>_____</td> <td></td> <td></td> <td></td> </tr> </tbody> </table>                                                                                | Midwakh/ Dokha      |                    |                     |                    | Roll your own cigarettes |             |  |  | Other. Specify                    |                                                 |  |  | _____ |  |  |  |
|-------------------------------------------------------------------------------------------------------|--------------------------------------------------------------------------------------------------------------------------------------------------------------------------------------------------------------------------------------------------------------------------------------------------------------------------------------------------------------------------------------------------|---------------------|--------------------|---------------------|--------------------|--------------------------|-------------|--|--|-----------------------------------|-------------------------------------------------|--|--|-------|--|--|--|
| Midwakh/ Dokha                                                                                        |                                                                                                                                                                                                                                                                                                                                                                                                  |                     |                    |                     |                    |                          |             |  |  |                                   |                                                 |  |  |       |  |  |  |
| Roll your own cigarettes                                                                              |                                                                                                                                                                                                                                                                                                                                                                                                  |                     |                    |                     |                    |                          |             |  |  |                                   |                                                 |  |  |       |  |  |  |
| Other. Specify                                                                                        |                                                                                                                                                                                                                                                                                                                                                                                                  |                     |                    |                     |                    |                          |             |  |  |                                   |                                                 |  |  |       |  |  |  |
| _____                                                                                                 |                                                                                                                                                                                                                                                                                                                                                                                                  |                     |                    |                     |                    |                          |             |  |  |                                   |                                                 |  |  |       |  |  |  |
| <b>B3.</b> Are you aware of an increase in the price of tobacco products recently?                    | <p>Yes ..... <input type="checkbox"/> 1</p> <p>No ..... <input type="checkbox"/> 2</p> <p>Specify:</p> <p>Cigarettes</p> <p>Waterpipe tobacco</p> <p>Both</p>                                                                                                                                                                                                                                    |                     |                    |                     |                    |                          |             |  |  |                                   |                                                 |  |  |       |  |  |  |
| <b>B4.</b> If yes, please report the before and after price of the products that you usually purchase | <table border="1"> <thead> <tr> <th><i>Product</i></th> <th><i>Unit</i></th> <th><i>Price Before</i></th> <th><i>Price After</i></th> </tr> </thead> <tbody> <tr> <td><i>Cigarettes</i></td> <td><i>Pack</i></td> <td></td> <td></td> </tr> <tr> <td><i>Waterpipe tobacco products</i></td> <td><i>Select unit: 50 g, 100g, 250g, 500g, 1kg</i></td> <td></td> <td></td> </tr> </tbody> </table> | <i>Product</i>      | <i>Unit</i>        | <i>Price Before</i> | <i>Price After</i> | <i>Cigarettes</i>        | <i>Pack</i> |  |  | <i>Waterpipe tobacco products</i> | <i>Select unit: 50 g, 100g, 250g, 500g, 1kg</i> |  |  |       |  |  |  |
| <i>Product</i>                                                                                        | <i>Unit</i>                                                                                                                                                                                                                                                                                                                                                                                      | <i>Price Before</i> | <i>Price After</i> |                     |                    |                          |             |  |  |                                   |                                                 |  |  |       |  |  |  |
| <i>Cigarettes</i>                                                                                     | <i>Pack</i>                                                                                                                                                                                                                                                                                                                                                                                      |                     |                    |                     |                    |                          |             |  |  |                                   |                                                 |  |  |       |  |  |  |
| <i>Waterpipe tobacco products</i>                                                                     | <i>Select unit: 50 g, 100g, 250g, 500g, 1kg</i>                                                                                                                                                                                                                                                                                                                                                  |                     |                    |                     |                    |                          |             |  |  |                                   |                                                 |  |  |       |  |  |  |
| <b>B5.</b> Did the price change affect your purchase patterns?                                        | <p>Yes ..... <input type="checkbox"/> 1</p> <p>No ..... <input type="checkbox"/> 2</p>                                                                                                                                                                                                                                                                                                           |                     |                    |                     |                    |                          |             |  |  |                                   |                                                 |  |  |       |  |  |  |
| <b>B6.</b> If yes, did it:                                                                            | <p>Increase your purchase patterns ..... <input type="checkbox"/> 1</p> <p>Decrease your purchase patterns ..... <input type="checkbox"/> 2</p>                                                                                                                                                                                                                                                  |                     |                    |                     |                    |                          |             |  |  |                                   |                                                 |  |  |       |  |  |  |
| <b>Regular Cigarettes</b>                                                                             |                                                                                                                                                                                                                                                                                                                                                                                                  |                     |                    |                     |                    |                          |             |  |  |                                   |                                                 |  |  |       |  |  |  |
| <b>B7.</b> Have you smoked at least 100 cigarettes in your entire life?                               | <p>Yes ..... <input type="checkbox"/> 1</p> <p>No..... <input type="checkbox"/> 2</p> <p>Don't know ..... <input type="checkbox"/> 999</p> <p>No response ..... <input type="checkbox"/> 777</p> <p><b>If answer is "no", skip question B4.</b></p>                                                                                                                                              |                     |                    |                     |                    |                          |             |  |  |                                   |                                                 |  |  |       |  |  |  |

HH.6

ECON-WTS 2018

|                                                                                                                             |                                                                                                                                                                                                                                                               |
|-----------------------------------------------------------------------------------------------------------------------------|---------------------------------------------------------------------------------------------------------------------------------------------------------------------------------------------------------------------------------------------------------------|
| <p><b>B8.</b> Do you <u>now</u> smoke cigarettes?</p>                                                                       | <p>Every day.....[] 1<br/> Some days .....[] 2<br/> Not at all .....[] 3<br/> Don't know .....[] 999<br/> No response .....[] 777<br/> <b>If the answer is “every day” or “somedays”, skip question B5.</b></p>                                               |
| <p><b>B9.</b> Do you think you might smoke cigarettes, even once, over the next year?</p>                                   | <p>Definitely yes ..... []1<br/> Probably yes .....[]2<br/> Probably no .....[]3<br/> Definitely no .....[]4<br/> <b>If answer is “probably no” or definitely no”, skip questions B6 – B10</b></p>                                                            |
| <p><b>B10.</b> The last time you bought cigarettes for yourself, how many cigarette packs did you buy?</p>                  | <p><i>Interviewer: record number /check unit</i><br/> ___ ___ ___<br/> Packs.....[] 2<br/> Carton.....[] 3<br/> Other (specify): _____.....[] 4<br/> Never bought cigarettes .....[] 5<br/> If answer is “never bought cigarettes”, skip questions B7-B10</p> |
| <p><b>B11.</b> In total, how much money did you pay for the last purchase?</p>                                              | <p><i>Interviewer: if participant doesn't know, enter 999</i><br/> ___ ___ ___ L.L.</p>                                                                                                                                                                       |
| <p><b>B12.</b> What was the cigarette pack brand name?</p>                                                                  | <p><i>Interviewer: record brand name</i><br/> _____</p>                                                                                                                                                                                                       |
| <p><b>B13.</b> Which of the following statements best describes your thinking about giving up <u>cigarette</u> smoking?</p> | <p>In the next 30 days ..... []1<br/> In the next 6 months .....[]2<br/> In the next year .....[]3<br/> More than one year from now .....[]4<br/> I don't want to quit .....[]5<br/> Don't know .....[] 999<br/> No response .....[] 777</p>                  |

HH.7

ECON-WTS 2018

|                                                                                                                                                                        |                                                                                                                                                                                           |
|------------------------------------------------------------------------------------------------------------------------------------------------------------------------|-------------------------------------------------------------------------------------------------------------------------------------------------------------------------------------------|
| <b>B14.</b> In the past 12 months, have you stopped smoking cigarettes for one day or longer because you were trying to quit?                                          | Yes .....[]1<br>No .....[]2<br>Don't know .....[] 999<br>No response .....[] 777                                                                                                          |
| <b>Arguileh</b>                                                                                                                                                        |                                                                                                                                                                                           |
| <b>B15.</b> Have you <u>ever</u> smoked tobacco in a arguileh even just a few puffs?                                                                                   | Yes .....[] 1<br>No.....[] 2<br>Don't know .....[] 999<br>No response .....[] 777<br><b>If answer is “no”, skip question B12</b>                                                          |
| <b>B16.</b> Do you <u>now</u> smoke tobacco in a waterpipe?                                                                                                            | Every day.....[] 1<br>Some days .....[] 2<br>Not at all .....[] 3<br>Don't know .....[] 999<br>No response .....[] 777<br><b>If answer is “everyday” or “somedays” skip question B13.</b> |
| <b>B17.</b> Do you think you might smoke waterpipe, even once, over the next year?                                                                                     | Definitely yes ..... []1<br>Probably yes .....[]2<br>Probably not .....[]3<br>Definitely not .....[]4<br><b>If answer is “probably not” or “definitely not”, skip questions B14 - B35</b> |
| <b>B18.</b> What flavor do you mostly prefer smoking?                                                                                                                  | Non-flavored .....[]1<br>Flavored. Insert flavor: _____ ....[]2                                                                                                                           |
| <b>B19.</b> The last time you smoked arguileh at a café/restaurant, how many arguileh smoking heads/rocks did you have and how much did you pay for these heads/rocks? | <i>Interviewer: record number and prices</i><br>Number: __ _ __<br><br>Price: __ _ __<br><br><b>If quantity is zero “0”, skip questions B16- B22</b>                                      |

HH.8



ECON-WTS 2018

|                                                                                                                                                                                                       |                                                                                                                                                                                                                   |
|-------------------------------------------------------------------------------------------------------------------------------------------------------------------------------------------------------|-------------------------------------------------------------------------------------------------------------------------------------------------------------------------------------------------------------------|
| <b>B20.</b> The last time you smoked arguileh at a café/restaurant, how much did you pay?                                                                                                             | <i>Interviewer: if participant doesn't know, enter 999</i><br>Record Price:<br>___ ___ ___ L.L.                                                                                                                   |
| <b>B21.</b> How many heads/rocks did they offer you for free?                                                                                                                                         | <i>Interviewer: Record number</i><br>___ ___ ___<br>Don't know .....[] 999<br>No response .....[] 777                                                                                                             |
| <b>B22.</b> Think of the last time you smoked arguileh at a café. Which of the following best describes the type of establishment?                                                                    | Café .....[]1<br>Baladi/ Sha'bi Café .....[]2<br>Internet café.....[]3<br>Restaurant .....[]4<br>Other _____.....[]5                                                                                              |
| <b>B23.</b> Does the establishment typically serve women?                                                                                                                                             | Yes.....[] 1<br>No .....[] 2<br>Don't know .....[] 999<br>No response .....[] 777                                                                                                                                 |
| <b>B24.</b> Approximately one year ago, how many arguileh smoking heads/rocks did you smoke during a typical arguileh café visit each month and how much did you pay for these heads/rocks per month? | <i>Interviewer: record number and prices if participant doesn't know the price, put 999</i><br>Number:___ ___ ___ per month<br>Price: :___ ___ ___ per month<br>Don't know .....[] 999<br>No response .....[] 777 |
| <b>B25.</b> Approximately one year ago, how much did you pay at a typical arguileh café visit each month?                                                                                             | <i>Interviewer: Record price</i><br>___ ___ ___ L.L. per month<br>Don't know .....[] 999<br>No response .....[] 777                                                                                               |
| <b>B26.</b> How many heads did they offer you for free?                                                                                                                                               | <i>Interviewer: Record number</i><br>___ ___ ___<br>Don't know .....[] 999<br>No response .....[] 777                                                                                                             |

HH.9

ECON-WTS 2018

|                                                                                                                                       |                                                                                                                                                                                                                                                                                                                                                                                                                                                                                                                                               |
|---------------------------------------------------------------------------------------------------------------------------------------|-----------------------------------------------------------------------------------------------------------------------------------------------------------------------------------------------------------------------------------------------------------------------------------------------------------------------------------------------------------------------------------------------------------------------------------------------------------------------------------------------------------------------------------------------|
| <p><b>B27.</b> The last time you bought arguileh tobacco pack for yourself from the store, how much arguileh tobacco did you buy?</p> | <p><i>Interviewer: record number and check unit</i></p> <p>___ ___ ___ 50 gram packs.....[] 1</p> <p>___ ___ ___ 100 gram packs.....[] 2</p> <p>___ ___ ___ 250 gram packs.....[] 3</p> <p>___ ___ ___ 500 gram packs.....[] 4</p> <p>___ ___ ___ 1 kilogram packs.....[] 5</p> <p>___ ___ ___ Other pack - specify weight: __.[] 6</p> <p>___ ___ ___ Bulk - specify weight: ____...[] 7</p> <p>Never bought arguileh tobacco from store ....[]8</p> <p><b>If the answer is “Never bought arguileh tobacco” skip questions B24 – B27</b></p> |
| <p><b>B28.</b> In total, how much did you pay for the purchase of arguileh tobacco from the store?</p>                                | <p><i>Interviewer: if participant doesn't know, enter 999</i></p> <p>___ ___ ___ L.L.</p>                                                                                                                                                                                                                                                                                                                                                                                                                                                     |
| <p><b>B29.</b> What was the arguileh tobacco brand name?</p>                                                                          | <p><i>Interviewer: record brand name</i></p> <p>_____</p>                                                                                                                                                                                                                                                                                                                                                                                                                                                                                     |
| <p><b>B30.</b> Approximately one year ago, how much arguileh tobacco did you buy from the store each month?</p>                       | <p><i>Interviewer: record number and check unit</i></p> <p>___ ___ ___ 50 gram packs.....[] 1</p> <p>___ ___ ___ 100 gram packs.....[] 2</p> <p>___ ___ ___ 250 gram packs.....[] 3</p> <p>___ ___ ___ 500 gram packs.....[] 4</p> <p>___ ___ ___ 1 kilogram packs.....[] 5</p> <p>___ ___ ___ Other pack - specify weight: __.[] 6</p> <p>___ ___ ___ Bulk - specify weight: ____...[] 7</p> <p>Never bought arguileh tobacco.....[] 8</p> <p>Don't know .....[] 999</p> <p>No response .....[] 777</p>                                      |

HH.10

ECON-WTS 2018

|                                                                                                                                                                                                          |                                                                                                                                                                                                                                                                                                                                                                                                                                                                                                  |
|----------------------------------------------------------------------------------------------------------------------------------------------------------------------------------------------------------|--------------------------------------------------------------------------------------------------------------------------------------------------------------------------------------------------------------------------------------------------------------------------------------------------------------------------------------------------------------------------------------------------------------------------------------------------------------------------------------------------|
| <p><b>B31.</b> Approximately one year ago, how much did you spend on arguileh tobacco purchases from stores each month ?</p>                                                                             | <p><i>Interviewer: if participant doesn't know, enter 999</i></p> <p>____ _ L.L. per month</p> <p>Don't know .....[] 999</p> <p>No response .....[] 777</p>                                                                                                                                                                                                                                                                                                                                      |
| <p><b>B32.</b> The last time you used arguileh delivery service, how many arguileh smoking heads/rocks did you buy and how much did you pay for these heads/rocks?</p>                                   | <p><i>Interviewer: record number and prices, if participant doesn't know, enter 999</i></p> <p>Number: ____ _</p> <p>Price: ____ _</p> <p><b>if the quantity is zero "0", skip questions B29–B33</b></p>                                                                                                                                                                                                                                                                                         |
| <p><b>B33.</b> The last time you used arguileh delivery service, how much did you pay?</p>                                                                                                               | <p><i>Interviewer: if participant doesn't know, enter 999</i></p> <p><i>Insert price:</i></p> <p>_____ L.L.</p>                                                                                                                                                                                                                                                                                                                                                                                  |
| <p><b>B34.</b> How many heads did they offer you for free?</p>                                                                                                                                           | <p><i>Interviewer: Record number</i></p> <p>_____</p> <p>Don't know .....[] 999</p> <p>No response .....[] 777</p>                                                                                                                                                                                                                                                                                                                                                                               |
| <p><b>B35.</b> Approximately one year ago, how many arguileh smoking heads/rocks did you order using arguileh delivery services each month and how much did you pay for these heads/rocks per month?</p> | <p><i>Interviewer: In case the participant expressed difficulty, ask him how many arguileh's does he order per month and typically how many heads come with the arguileh and then multiply them. For example, if on average you smoke 20 arguileh's per month and it comes with 2 heads, then your total is <math>20 \times 2 = 40</math>.</i></p> <p><i>Record number and prices, if participant doesn't know, enter 999</i></p> <p>Number: ____ _ per month</p> <p>Price: ____ _ per month</p> |

HH.11

ECON-WTS 2018

|                                                                                                                             |                                                                                                                                                                                                                           |
|-----------------------------------------------------------------------------------------------------------------------------|---------------------------------------------------------------------------------------------------------------------------------------------------------------------------------------------------------------------------|
|                                                                                                                             | Don't know .....[] 999<br>No response .....[] 777                                                                                                                                                                         |
| <b>B36.</b> Approximately one year ago, how much did you pay?                                                               | Appro<br><i>Interviewer: Record price. If participant doesn't know, put 999.</i><br>____ L.L. per month<br>Don't know .....[] 999<br>No response .....[] 777                                                              |
| <b>B37.</b> How many heads did they offer you for free?                                                                     | <i>Interviewer: record number</i><br>_____<br>Don't know .....[] 999<br>No response .....[] 777                                                                                                                           |
| <b>B38.</b> Which of the following statements best describes your thinking about giving up <u>arguileh</u> smoking?         | In the next 30 days ..... []1<br>In the next 6 months .....[]2<br>In the next year .....[]3<br>More than one year from now .....[]4<br>I don't want to quit .....[]5<br>Don't know .....[] 999<br>No response .....[] 777 |
| <b>B39.</b> In the past 12 months, have you stopped smoking arguileh for one day or longer because you were trying to quit? | Yes .....[]1<br>No .....[]2<br>Don't know .....[] 999<br>No response .....[] 777                                                                                                                                          |
| <b>B40.</b> In your opinion, is it acceptable for females to smoke waterpipe in general?                                    | Yes .....[]1<br>No .....[]2<br>Don't know .....[] 999<br>No response .....[] 777                                                                                                                                          |

Would you consider purchasing any tobacco products (cigarettes, arguileh tobacco, arguileh delivery, arguileh at a café,) at any time in the future?

Yes .....[]1

No.....[]2

If the answer is "No" the interviewer should skip the DCE scenarios.

HH.12

ECON-WTS 2018

**SECTION C: DISCRETE CHOICE EXPERIMENT*****Description:***

- In the next section, you will see 8 hypothetical choice scenarios about buying tobacco for yourself, the only difference between the scenarios is the price of the tobacco products
- Each scenario will present you with 8 different tobacco products that you may purchase:
  1. Premium cigarettes like Marlboro, Davidoff, and Gitanes
  2. Discount cigarettes like Byblos, Cedars, and Maestro
  3. Premium mouassal arguileh tobacco (250 g) like Al Fakher, Nakhla, and Mazaya
  4. Discount mouassal arguileh tobacco (250 g) like Ya layl, Al Tamayoz
  5. Ajami arguileh tobacco (250 g) like Al Zaeem, Al Bacha, and Tombac Asfahani

HH.13

ECON-WTS 2018

6. Home-delivery of prepared arguileh
7. Baladi/sha'bi arguileh cafes
8. Fancy arguileh cafes

- Each of the 8 product categories will have its own price, and the prices change in each scenario.
- You will be asked to imagine yourself buying your needs of arguileh and cigarette smoking products as you would typically in real life, and tell us how many items you would buy.
- You may choose to buy 1 or more items from some types and none (i.e. 0) from others. You may choose to buy nothing at all, in which case the answer will be 0 for all 8 tobacco products.
- Please seriously consider the prices at which each item is being offered when making your decision about the quantities. Make sure that the sum you spend on these products is in line with your budget for buying tobacco. Also, keep in mind that the money you spend on tobacco products will not be available for you to spend on other things.
- Here is an example of a choice scenario:

**. Think about the amount of arguileh and cigarette products you would purchase, based on the following prices:**

|          | Cigarettes premium | Cigarettes discount | Arguileh tobacco premium | Arguileh tobacco discount | Ajami      | Arguileh home delivery | Arguileh at fancy cafe | Arguileh session at Sha'bi cafe |
|----------|--------------------|---------------------|--------------------------|---------------------------|------------|------------------------|------------------------|---------------------------------|
|          | Pack of 20         | Pack of 20          | 250g pack                | 250g pack                 | 250g pack  | 1 waterpipe            | 1 waterpipe            | 1 waterpipe                     |
| Price    | 5,000 L.L          | 1,250 L.L           | 13,500 L.L               | 10,250 L.L                | 20,000 L.L | 7,500 L.L              | 15,000 L.L             | 7,500 L.L                       |
| Quantity | <i>1</i>           | <i>0</i>            | <i>2</i>                 | <i>0</i>                  | <i>0</i>   | <i>0</i>               | <i>1</i>               | <i>2</i>                        |

Now I leave you to complete the choice scenarios. [INTERVIEWER: LEAVE THE PARTICIPANT TO FILL IN THE CHOICE SETS]

VERSION 1

HH.14

ECON-WTS 2018

**C1. Think about the amount of arguileh and cigarette products you would purchase, based on the following prices:**

|          | Cigarettes premium | Cigarettes discount | Arguileh tobacco premium | Arguileh tobacco discount | Tombac Ajami | Arguileh home delivery | Arguileh café session premium | Arguileh café session at Sha'bi café |
|----------|--------------------|---------------------|--------------------------|---------------------------|--------------|------------------------|-------------------------------|--------------------------------------|
|          | Pack of 20         | Pack of 20          | 250g pack                | 250g pack                 | 250g pack    | 1 waterpipe            | 1 waterpipe                   | 1 waterpipe                          |
| Price    | 2, 500 L.L         | 750 L.L             | 13, 500 L.L              | 10, 250 L.L               | 20, 000 L.L  | 7, 500 L.L             | 15, 000 L.L                   | 7, 500 LL                            |
| Quantity |                    |                     |                          |                           |              |                        |                               |                                      |

**C2. Think about the amount of arguileh and cigarette products you would purchase, based on the following prices:**

|          | Cigarettes premium | Cigarettes discount | Arguileh tobacco premium | Arguileh tobacco discount | Arguileh tobacco non-flavored | Arguileh home delivery | Arguileh café session premium | Arguileh café session at Sha'bi café |
|----------|--------------------|---------------------|--------------------------|---------------------------|-------------------------------|------------------------|-------------------------------|--------------------------------------|
|          | Pack of 20         | Pack of 20          | 250g pack                | 250g pack                 | 250g pack                     | 1 waterpipe            | 1 waterpipe                   | 1 waterpipe                          |
| Price    | 2, 500 L.L         | 750 L.L             | 20, 250 L.L              | 15, 250 L.L               | 67, 500 L.L                   | 25, 250 L.L            | 33, 750 L.L                   | 16, 750 L.L                          |
| Quantity |                    |                     |                          |                           |                               |                        |                               |                                      |

HH.15

ECON-WTS 2018

**C3. Think about the amount of arguileh and cigarette products you would purchase, based on the following prices:**

|          | Cigarettes premium | Cigarettes discount | Arguileh tobacco premium | Arguileh tobacco discount | Tombac Ajami | Arguileh home delivery | Arguileh café session premium | Arguileh café session at Sha'bi café |
|----------|--------------------|---------------------|--------------------------|---------------------------|--------------|------------------------|-------------------------------|--------------------------------------|
|          | Pack of 20         | Pack of 20          | 250g pack                | 250g pack                 | 250g pack    | 1 waterpipe            | 1 waterpipe                   | 1 waterpipe                          |
| Price    | 4,000 L.L          | 1,250 L.L           | 30,250 L.L               | 10,250 L.L                | 45,000 L.L   | 16,750 L.L             | 50,500 L.L                    | 25,250 L.L                           |
| Quantity |                    |                     |                          |                           |              |                        |                               |                                      |

**C4. Think about the amount of arguileh and cigarette products you would purchase, based on the following prices:**

|          | Cigarettes premium | Cigarettes discount | Arguileh tobacco premium | Arguileh tobacco discount | Tombac Ajami | Arguileh home delivery | Arguileh café session premium | Arguileh café session at Sha'bi café |
|----------|--------------------|---------------------|--------------------------|---------------------------|--------------|------------------------|-------------------------------|--------------------------------------|
|          | Pack of 20         | Pack of 20          | 250g pack                | 250g pack                 | 250g pack    | 1 waterpipe            | 1 waterpipe                   | 1 waterpipe                          |
| Price    | 4,000 L.L          | 1,250 L.L           | 45,500 L.L               | 15,250 L.L                | 30,000 L.L   | 11,250 L.L             | 22,500 L.L                    | 11,250 L.L                           |
| Quantity |                    |                     |                          |                           |              |                        |                               |                                      |

HH.16



ECON-WTS 2018

**C5. Think about the amount of arguileh and cigarette products you would purchase, based on the following prices:**

|                | Cigarettes premium | Cigarettes discount | Arguileh tobacco premium | Arguileh tobacco discount | Tombac Ajami | Arguileh home delivery | Arguileh café session premium | Arguileh café session at Sha'bi café |
|----------------|--------------------|---------------------|--------------------------|---------------------------|--------------|------------------------|-------------------------------|--------------------------------------|
|                | Pack of 20         | Pack of 20          | 250g pack                | 250g pack                 | 250g pack    | 1 waterpipe            | 1 waterpipe                   | 1 waterpipe                          |
| Price          | 5, 500 L.L         | 1, 750 L.L          | 13, 500 L.L              | 23, 000 L.L               | 45, 000 L.L  | 16, 750 L.L            | 33, 750 L.L                   | 16, 750 L.L                          |
| Enter quantity |                    |                     |                          |                           |              |                        |                               |                                      |

**C6. Think about the amount of arguileh and cigarette products you would purchase, based on the following prices:**

|                | Cigarettes premium | Cigarettes discount | Arguileh tobacco premium | Arguileh tobacco discount | Tombac Ajami | Arguileh home delivery | Arguileh café session premium | Arguileh café session at Sha'bi café |
|----------------|--------------------|---------------------|--------------------------|---------------------------|--------------|------------------------|-------------------------------|--------------------------------------|
|                | Pack of 20         | Pack of 20          | 250g pack                | 250g pack                 | 250g pack    | 1 waterpipe            | 1 waterpipe                   | 1 waterpipe                          |
| Price          | 5, 500 L.L         | 1, 750 L.L          | 20, 250 L.L              | 34, 500 L.L               | 30, 000 L.L  | 11, 250 L.L            | 15, 000 L.L                   | 7, 500 L.L                           |
| Enter quantity |                    |                     |                          |                           |              |                        |                               |                                      |

HH.17

ECON-WTS 2018

**C7. Think about the amount of arguileh and cigarette products you would purchase, based on the following prices:**

|          | Cigarettes premium | Cigarettes discount | Arguileh tobacco premium | Arguileh tobacco discount | Tombac Ajami | Arguileh home delivery | Arguileh café session premium | Arguileh café session at Sha'bi café |
|----------|--------------------|---------------------|--------------------------|---------------------------|--------------|------------------------|-------------------------------|--------------------------------------|
|          | Pack of 20         | Pack of 20          | 250g pack                | 250g pack                 | 250g pack    | 1 waterpipe            | 1 waterpipe                   | 1 waterpipe                          |
| Price    | 8, 000 L.L         | 2, 500 L.L          | 30, 250 L.L              | 23, 000 L.L               | 20, 000 L.L  | 7, 500 L.L             | 22, 500 L.L                   | 11, 250 L.L                          |
| Quantity |                    |                     |                          |                           |              |                        |                               |                                      |

**C8. Think about the amount of arguileh and cigarette products you would purchase, based on the following prices:**

|          | Cigarettes premium | Cigarettes discount | Arguileh tobacco premium | Arguileh tobacco discount | Tombac Ajami | Arguileh home delivery | Arguileh Café session premium | Waterpipe café session at Sha'bi café |
|----------|--------------------|---------------------|--------------------------|---------------------------|--------------|------------------------|-------------------------------|---------------------------------------|
|          | Pack of 20         | Pack of 20          | 250g pack                | 250g pack                 | 250g pack    | 1 waterpipe            | 1 waterpipe                   | 1 waterpipe                           |
| Price    | 8, 000 L.L         | 2, 500 L.L.         | 45, 500 L.L              | 34, 500 L.L               | 67, 500 L.L  | 25, 250 L.L            | 50, 500 L.L                   | 25, 250 L.L                           |
| Quantity |                    |                     |                          |                           |              |                        |                               |                                       |

HH.18

ECON-WTS 2018

## VERSION 2

**C1. Think about the amount of arguileh and cigarette products you would purchase, based on the following prices:**

|          | Cigarettes premium | Cigarettes discount | Arguileh tobacco premium | Arguileh tobacco discount | Tombac Ajami | Arguileh home delivery | Arguileh café session premium | Arguileh café session at Sha'bi café |
|----------|--------------------|---------------------|--------------------------|---------------------------|--------------|------------------------|-------------------------------|--------------------------------------|
|          | Pack of 20         | Pack of 20          | 250g pack                | 250g pack                 | 250g pack    | 1 waterpipe            | 1 waterpipe                   | 1 waterpipe                          |
| Price    | 2, 500 L.L         | 1, 250 L.L          | 30, 250 L.L              | 34, 500 L.L               | 20, 000 L.L  | 11, 250 L.L            | 33, 750 L.L                   | 25, 250 LL                           |
| Quantity |                    |                     |                          |                           |              |                        |                               |                                      |

**C2. Think about the amount of arguileh and cigarette products you would purchase, based on the following prices:**

|          | Cigarettes premium | Cigarettes discount | Arguileh tobacco premium | Arguileh tobacco discount | Tombac Ajami | Arguileh home delivery | Arguileh café session premium | Arguileh café session at Sha'bi café |
|----------|--------------------|---------------------|--------------------------|---------------------------|--------------|------------------------|-------------------------------|--------------------------------------|
|          | Pack of 20         | Pack of 20          | 250g pack                | 250g pack                 | 250g pack    | 1 waterpipe            | 1 waterpipe                   | 1 waterpipe                          |
| Price    | 2, 500 L.L         | 1, 250 L.L          | 45, 500 L.L              | 23, 000 L.L               | 67, 500 L.L  | 16, 750 L.L            | 15, 000 L.L                   | 11, 250 L.L                          |
| Quantity |                    |                     |                          |                           |              |                        |                               |                                      |

HH.19

ECON-WTS 2018

**C3. Think about the amount of arguileh and cigarette products you would purchase, based on the following prices:**

|          | Cigarettes premium | Cigarettes discount | Arguileh tobacco premium | Arguileh tobacco discount | Tombac Ajami | Arguileh home delivery | Arguileh café session premium | Arguileh café session at Sha'bi café |
|----------|--------------------|---------------------|--------------------------|---------------------------|--------------|------------------------|-------------------------------|--------------------------------------|
|          | Pack of 20         | Pack of 20          | 250g pack                | 250g pack                 | 250g pack    | 1 waterpipe            | 1 waterpipe                   | 1 waterpipe                          |
| Price    | 4, 000 L.L         | 750 L.L             | 13, 500 L.L              | 34, 500 L.L               | 45, 000 L.L  | 25, 250 L.L            | 22, 500 L.L                   | 7, 500 L.L                           |
| Quantity |                    |                     |                          |                           |              |                        |                               |                                      |

**C4. Think about the amount of arguileh and cigarette products you would purchase, based on the following prices:**

|          | Cigarettes premium | Cigarettes discount | Arguileh tobacco premium | Arguileh tobacco discount | Tombac Ajami | Arguileh home delivery | Arguileh café session premium | Arguileh café session at Sha'bi café |
|----------|--------------------|---------------------|--------------------------|---------------------------|--------------|------------------------|-------------------------------|--------------------------------------|
|          | Pack of 20         | Pack of 20          | 250g pack                | 250g pack                 | 250g pack    | 1 waterpipe            | 1 waterpipe                   | 1 waterpipe                          |
| Price    | 4, 000 L.L         | 1,750 L.L           | 13, 500 L.L              | 23, 000 L.L               | 45, 000 L.L  | 16, 750 L.L            | 33, 750 L.L                   | 16, 750 L.L                          |
| Quantity |                    |                     |                          |                           |              |                        |                               |                                      |

HH.20

ECON-WTS 2018

**C5. Think about the amount of arguileh and cigarette products you would purchase, based on the following prices:**

|                | Cigarettes premium | Cigarettes discount | Arguileh tobacco premium | Arguileh tobacco discount | Tombac Ajami | Arguileh home delivery | Arguileh café session premium | Arguileh café session at Sha'bi café |
|----------------|--------------------|---------------------|--------------------------|---------------------------|--------------|------------------------|-------------------------------|--------------------------------------|
|                | Pack of 20         | Pack of 20          | 250g pack                | 250g pack                 | 250g pack    | 1 waterpipe            | 1 waterpipe                   | 1 waterpipe                          |
| Price          | 5, 500 L.L         | 2, 500 L.L          | 30, 250 L.L              | 15, 250 L.L               | 45, 000 L.L  | 25, 250 L.L            | 15, 000 L.L                   | 11, 250 L.L                          |
| Enter quantity |                    |                     |                          |                           |              |                        |                               |                                      |

**C6. Think about the amount of arguileh and cigarette products you would purchase, based on the following prices:**

|                | Cigarettes premium | Cigarettes discount | Arguileh tobacco premium | Arguileh tobacco discount | Tombac Ajami | Arguileh home delivery | Arguileh café session premium | Arguileh café session at Sha'bi café |
|----------------|--------------------|---------------------|--------------------------|---------------------------|--------------|------------------------|-------------------------------|--------------------------------------|
|                | Pack of 20         | Pack of 20          | 250g pack                | 250g pack                 | 250g pack    | 1 waterpipe            | 1 waterpipe                   | 1 waterpipe                          |
| Price          | 5, 500 L.L         | 2, 500 L.L          | 45, 500 L.L              | 10, 250 L.L               | 30, 000 L.L  | 7, 500 L.L             | 33, 750 L.L                   | 25, 250 L.L                          |
| Enter quantity |                    |                     |                          |                           |              |                        |                               |                                      |

HH.21

ECON-WTS 2018

**C7. Think about the amount of arguileh and cigarette products you would purchase, based on the following prices:**

|          | Cigarettes premium | Cigarettes discount | Arguileh tobacco premium | Arguileh tobacco discount | Tombac Ajami | Arguileh home delivery | Arguileh café session premium | Arguileh café session at Sha'bi café |
|----------|--------------------|---------------------|--------------------------|---------------------------|--------------|------------------------|-------------------------------|--------------------------------------|
|          | Pack of 20         | Pack of 20          | 250g pack                | 250g pack                 | 250g pack    | 1 waterpipe            | 1 waterpipe                   | 1 waterpipe                          |
| Price    | 8,000 L.L          | 1,750 L.L           | 13,500 L.L               | 15,250 L.L                | 20,000 L.L   | 11,250 L.L             | 50,500 L.L                    | 16,750 L.L                           |
| Quantity |                    |                     |                          |                           |              |                        |                               |                                      |

**C8. Think about the amount of arguileh and cigarette products you would purchase, based on the following prices:**

|          | Cigarettes premium | Cigarettes discount | Arguileh tobacco premium | Arguileh tobacco discount | Tombac Ajami | Arguileh home delivery | Arguileh Café session premium | Waterpipe café session at Sha'bi café |
|----------|--------------------|---------------------|--------------------------|---------------------------|--------------|------------------------|-------------------------------|---------------------------------------|
|          | Pack of 20         | Pack of 20          | 250g pack                | 250g pack                 | 250g pack    | 1 waterpipe            | 1 waterpipe                   | 1 waterpipe                           |
| Price    | 8,000 L.L          | 1,750 L.L.          | 20,250 L.L               | 10,250 L.L                | 67,500 L.L   | 16,750 L.L             | 22,500 L.L                    | 7,500 L.L                             |
| Quantity |                    |                     |                          |                           |              |                        |                               |                                       |

HH.22

ECON-WTS 2018

## VERSION 3

**C1. Think about the amount of arguileh and cigarette products you would purchase, based on the following prices:**

|          | Cigarettes premium | Cigarettes discount | Arguileh tobacco premium | Arguileh tobacco discount | Tombac Ajami | Arguileh home delivery | Arguileh café session premium | Arguileh café session at Sha'bi café |
|----------|--------------------|---------------------|--------------------------|---------------------------|--------------|------------------------|-------------------------------|--------------------------------------|
|          | Pack of 20         | Pack of 20          | 250g pack                | 250g pack                 | 250g pack    | 1 waterpipe            | 1 waterpipe                   | 1 waterpipe                          |
| Price    | 2, 500 L.L         | 1, 750 L.L          | 13, 500 L.L              | 23, 000 L.L               | 30, 000 L.L  | 25, 250 L.L            | 22, 500 L.L                   | 25, 250 LL                           |
| Quantity |                    |                     |                          |                           |              |                        |                               |                                      |

**C2. Think about the amount of arguileh and cigarette products you would purchase, based on the following prices:**

|          | Cigarettes premium | Cigarettes discount | Arguileh tobacco premium | Arguileh tobacco discount | Tombac Ajami | Arguileh home delivery | Arguileh café session premium | Arguileh café session at Sha'bi café |
|----------|--------------------|---------------------|--------------------------|---------------------------|--------------|------------------------|-------------------------------|--------------------------------------|
|          | Pack of 20         | Pack of 20          | 250g pack                | 250g pack                 | 250g pack    | 1 waterpipe            | 1 waterpipe                   | 1 waterpipe                          |
| Price    | 2, 500 L.L         | 1, 750 L.L          | 20, 250 L.L              | 34, 500 L.L               | 45, 000 L.L  | 7, 500 L.L             | 50, 500 L.L                   | 11, 250 L.L                          |
| Quantity |                    |                     |                          |                           |              |                        |                               |                                      |

HH.23

ECON-WTS 2018

**C3. Think about the amount of arguileh and cigarette products you would purchase, based on the following prices:**

|          | Cigarettes premium | Cigarettes discount | Arguileh tobacco premium | Arguileh tobacco discount | Tombac Ajami | Arguileh home delivery | Arguileh café session premium | Arguileh café session at Sha'bi café |
|----------|--------------------|---------------------|--------------------------|---------------------------|--------------|------------------------|-------------------------------|--------------------------------------|
|          | Pack of 20         | Pack of 20          | 250g pack                | 250g pack                 | 250g pack    | 1 waterpipe            | 1 waterpipe                   | 1 waterpipe                          |
| Price    | 4, 000 L.L         | 2, 500 L.L          | 30, 250 L.L              | 23, 000 L.L               | 67, 500 L.L  | 11, 250 L.L            | 33, 750 L.L                   | 7, 500 L.L                           |
| Quantity |                    |                     |                          |                           |              |                        |                               |                                      |

**C4. Think about the amount of arguileh and cigarette products you would purchase, based on the following prices:**

|          | Cigarettes premium | Cigarettes discount | Arguileh tobacco premium | Arguileh tobacco discount | Tombac Ajami | Arguileh home delivery | Arguileh café session premium | Arguileh café session at Sha'bi café |
|----------|--------------------|---------------------|--------------------------|---------------------------|--------------|------------------------|-------------------------------|--------------------------------------|
|          | Pack of 20         | Pack of 20          | 250g pack                | 250g pack                 | 250g pack    | 1 waterpipe            | 1 waterpipe                   | 1 waterpipe                          |
| Price    | 4, 000 L.L         | 2, 500 L.L          | 45, 500 L.L              | 34, 500 L.L               | 20, 000 L.L  | 16, 750 L.L            | 15, 000 L.L                   | 16, 750 L.L                          |
| Quantity |                    |                     |                          |                           |              |                        |                               |                                      |

HH.24



ECON-WTS 2018

**C5. Think about the amount of arguileh and cigarette products you would purchase, based on the following prices:**

|                | Cigarettes premium | Cigarettes discount | Arguileh tobacco premium | Arguileh tobacco discount | Tombac Ajami | Arguileh home delivery | Arguileh café session premium | Arguileh café session at Sha'bi café |
|----------------|--------------------|---------------------|--------------------------|---------------------------|--------------|------------------------|-------------------------------|--------------------------------------|
|                | Pack of 20         | Pack of 20          | 250g pack                | 250g pack                 | 250g pack    | 1 waterpipe            | 1 waterpipe                   | 1 waterpipe                          |
| Price          | 5, 500 L.L         | 750 L.L             | 13, 500 L.L              | 10, 250 L.L               | 67, 500 L.L  | 11, 250 L.L            | 50, 500 L.L                   | 11, 250 L.L                          |
| Enter quantity |                    |                     |                          |                           |              |                        |                               |                                      |

**C6. Think about the amount of arguileh and cigarette products you would purchase, based on the following prices:**

|                | Cigarettes premium | Cigarettes discount | Arguileh tobacco premium | Arguileh tobacco discount | Tombac Ajami | Arguileh home delivery | Arguileh café session premium | Arguileh café session at Sha'bi café |
|----------------|--------------------|---------------------|--------------------------|---------------------------|--------------|------------------------|-------------------------------|--------------------------------------|
|                | Pack of 20         | Pack of 20          | 250g pack                | 250g pack                 | 250g pack    | 1 waterpipe            | 1 waterpipe                   | 1 waterpipe                          |
| Price          | 5, 500 L.L         | 750 L.L             | 20, 250 L.L              | 15, 250 L.L               | 20, 000 L.L  | 16, 750 L.L            | 22, 500 L.L                   | 25, 250 L.L                          |
| Enter quantity |                    |                     |                          |                           |              |                        |                               |                                      |

HH.25

ECON-WTS 2018

**C7. Think about the amount of arguileh and cigarette products you would purchase, based on the following prices:**

|          | Cigarettes premium | Cigarettes discount | Arguileh tobacco premium | Arguileh tobacco discount | Tombac Ajami | Arguileh home delivery | Arguileh café session premium | Arguileh café session at Sha'bi café |
|----------|--------------------|---------------------|--------------------------|---------------------------|--------------|------------------------|-------------------------------|--------------------------------------|
|          | Pack of 20         | Pack of 20          | 250g pack                | 250g pack                 | 250g pack    | 1 waterpipe            | 1 waterpipe                   | 1 waterpipe                          |
| Price    | 8,000 L.L          | 1, 250 L.L          | 30, 250 L.L              | 10, 250 L.L               | 30, 000 L.L  | 25, 250 L.L            | 15, 000 L.L                   | 16, 750 L.L                          |
| Quantity |                    |                     |                          |                           |              |                        |                               |                                      |

**C8. Think about the amount of arguileh and cigarette products you would purchase, based on the following prices:**

|          | Cigarettes premium | Cigarettes discount | Arguileh tobacco premium | Arguileh tobacco discount | Tombac Ajami | Arguileh home delivery | Arguileh Café session premium | Waterpipe café session at Sha'bi café |
|----------|--------------------|---------------------|--------------------------|---------------------------|--------------|------------------------|-------------------------------|---------------------------------------|
|          | Pack of 20         | Pack of 20          | 250g pack                | 250g pack                 | 250g pack    | 1 waterpipe            | 1 waterpipe                   | 1 waterpipe                           |
| Price    | 8, 000 L.L         | 1, 250 L.L.         | 45, 500 L.L              | 15, 250 L.L               | 45, 000 L.L  | 7, 500 L.L             | 33, 750 L.L                   | 7, 500 L.L                            |
| Quantity |                    |                     |                          |                           |              |                        |                               |                                       |

HH.26

ECON-WTS 2018

## VERSION 4

**C1. Think about the amount of arguileh and cigarette products you would purchase, based on the following prices:**

|          | Cigarettes premium | Cigarettes discount | Arguileh tobacco premium | Arguileh tobacco discount | Tombac Ajami | Arguileh home delivery | Arguileh café session premium | Arguileh café session at Sha'bi café |
|----------|--------------------|---------------------|--------------------------|---------------------------|--------------|------------------------|-------------------------------|--------------------------------------|
|          | Pack of 20         | Pack of 20          | 250g pack                | 250g pack                 | 250g pack    | 1 waterpipe            | 1 waterpipe                   | 1 waterpipe                          |
| Price    | 2, 500 L.L         | 2, 500 L.L          | 30, 250 L.L              | 15, 250 L.L               | 30, 000 L.L  | 16, 750 L.L            | 50, 500 L.L                   | 7, 500 LL                            |
| Quantity |                    |                     |                          |                           |              |                        |                               |                                      |

**C2. Think about the amount of arguileh and cigarette products you would purchase, based on the following prices:**

|          | Cigarettes premium | Cigarettes discount | Arguileh tobacco premium | Arguileh tobacco discount | Tombac Ajami | Arguileh home delivery | Arguileh café session premium | Arguileh café session at Sha'bi café |
|----------|--------------------|---------------------|--------------------------|---------------------------|--------------|------------------------|-------------------------------|--------------------------------------|
|          | Pack of 20         | Pack of 20          | 250g pack                | 250g pack                 | 250g pack    | 1 waterpipe            | 1 waterpipe                   | 1 waterpipe                          |
| Price    | 2, 500 L.L         | 2, 500 L.L          | 45, 500 L.L              | 10, 250 L.L               | 45, 000 L.L  | 11, 250 L.L            | 22, 500 L.L                   | 16, 750 L.L                          |
| Quantity |                    |                     |                          |                           |              |                        |                               |                                      |

HH.27

ECON-WTS 2018

**C3. Think about the amount of arguileh and cigarette products you would purchase, based on the following prices:**

|          | Cigarettes premium | Cigarettes discount | Arguileh tobacco premium | Arguileh tobacco discount | Tombac Ajami | Arguileh home delivery | Arguileh café session premium | Arguileh café session at Sha'bi café |
|----------|--------------------|---------------------|--------------------------|---------------------------|--------------|------------------------|-------------------------------|--------------------------------------|
|          | Pack of 20         | Pack of 20          | 250g pack                | 250g pack                 | 250g pack    | 1 waterpipe            | 1 waterpipe                   | 1 waterpipe                          |
| Price    | 4, 000 L.L         | 1, 750 L.L          | 13, 500 L.L              | 15, 250 L.L               | 67, 500 L.L  | 7, 500 L.L             | 15, 000 L.L                   | 25, 250 L.L                          |
| Quantity |                    |                     |                          |                           |              |                        |                               |                                      |

**C4. Think about the amount of arguileh and cigarette products you would purchase, based on the following prices:**

|          | Cigarettes premium | Cigarettes discount | Arguileh tobacco premium | Arguileh tobacco discount | Tombac Ajami | Arguileh home delivery | Arguileh café session premium | Arguileh café session at Sha'bi café |
|----------|--------------------|---------------------|--------------------------|---------------------------|--------------|------------------------|-------------------------------|--------------------------------------|
|          | Pack of 20         | Pack of 20          | 250g pack                | 250g pack                 | 250g pack    | 1 waterpipe            | 1 waterpipe                   | 1 waterpipe                          |
| Price    | 4, 000 L.L         | 1, 750 L.L          | 20, 250 L.L              | 10, 250 L.L               | 20, 000 L.L  | 25, 250 L.L            | 33, 750 L.L                   | 11, 250 L.L                          |
| Quantity |                    |                     |                          |                           |              |                        |                               |                                      |

HH.28

ECON-WTS 2018

**C5. Think about the amount of arguileh and cigarette products you would purchase, based on the following prices:**

|                | Cigarettes premium | Cigarettes discount | Arguileh tobacco premium | Arguileh tobacco discount | Tombac Ajami | Arguileh home delivery | Arguileh café session premium | Arguileh café session at Sha'bi café |
|----------------|--------------------|---------------------|--------------------------|---------------------------|--------------|------------------------|-------------------------------|--------------------------------------|
|                | Pack of 20         | Pack of 20          | 250g pack                | 250g pack                 | 250g pack    | 1 waterpipe            | 1 waterpipe                   | 1 waterpipe                          |
| Price          | 5, 500 L.L         | 1, 250 L.L          | 30, 250 L.L              | 34, 500 L.L               | 67, 500 L.L  | 7, 500 L.L             | 22, 500 L.L                   | 16, 750 L.L                          |
| Enter quantity |                    |                     |                          |                           |              |                        |                               |                                      |

**C6. Think about the amount of arguileh and cigarette products you would purchase, based on the following prices:**

|                | Cigarettes premium | Cigarettes discount | Arguileh tobacco premium | Arguileh tobacco discount | Tombac Ajami | Arguileh home delivery | Arguileh café session premium | Arguileh café session at Sha'bi café |
|----------------|--------------------|---------------------|--------------------------|---------------------------|--------------|------------------------|-------------------------------|--------------------------------------|
|                | Pack of 20         | Pack of 20          | 250g pack                | 250g pack                 | 250g pack    | 1 waterpipe            | 1 waterpipe                   | 1 waterpipe                          |
| Price          | 5, 500 L.L         | 1, 250 L.L          | 45, 500 L.L              | 23, 000 L.L               | 20, 000 L.L  | 25, 250 L.L            | 50, 500 L.L                   | 7, 500 L.L                           |
| Enter quantity |                    |                     |                          |                           |              |                        |                               |                                      |

HH.29

ECON-WTS 2018

**C7. Think about the amount of arguileh and cigarette products you would purchase, based on the following prices:**

|          | Cigarettes premium | Cigarettes discount | Arguileh tobacco premium | Arguileh tobacco discount | Tombac Ajami | Arguileh home delivery | Arguileh café session premium | Arguileh café session at Sha'bi café |
|----------|--------------------|---------------------|--------------------------|---------------------------|--------------|------------------------|-------------------------------|--------------------------------------|
|          | Pack of 20         | Pack of 20          | 250g pack                | 250g pack                 | 250g pack    | 1 waterpipe            | 1 waterpipe                   | 1 waterpipe                          |
| Price    | 8,000 L.L          | 750 L.L             | 13,500 L.L               | 34,500 L.L                | 30,000 L.L   | 16,750 L.L             | 33,750 L.L                    | 11,250 L.L                           |
| Quantity |                    |                     |                          |                           |              |                        |                               |                                      |

**C8. Think about the amount of arguileh and cigarette products you would purchase, based on the following prices:**

|          | Cigarettes premium | Cigarettes discount | Arguileh tobacco premium | Arguileh tobacco discount | Tombac Ajami | Arguileh home delivery | Arguileh Café session premium | Waterpipe café session at Sha'bi café |
|----------|--------------------|---------------------|--------------------------|---------------------------|--------------|------------------------|-------------------------------|---------------------------------------|
|          | Pack of 20         | Pack of 20          | 250g pack                | 250g pack                 | 250g pack    | 1 waterpipe            | 1 waterpipe                   | 1 waterpipe                           |
| Price    | 8,000 L.L          | 750 L.L.            | 20,250 L.L               | 23,000 L.L                | 45,000 L.L   | 11,250 L.L             | 15,000 L.L                    | 25,250 L.L                            |
| Quantity |                    |                     |                          |                           |              |                        |                               |                                       |

For non-smokers only :

Interviewer: Fill this for non-smokers only. Choose the appropriate option.

- 1- The participant filled out the scenarios
- 2- The participant partially filled out the scenarios or the interviewer completed the scenarios.

HH.30
